# Supplementary material
Source: Research Square preprint supplement (doi:10.21203/rs.3.rs-9135254/v1)
Supplement: Supplementary file 1 [file e2a83f37bae0b505b9c818e4.docx]

**Supplementary Methods**

**Short-read sequence data analysis for *LILRA7* copy-number inference**

**Cohort definition and population labels**

We analysed short-read whole-genome sequencing (srWGS) data from the 1000 Genomes Project (1kGP) Phase 3. All population-level analyses were restricted to 2,504 individuals annotated as unrelated to avoid inflation of frequency estimates by family structure. Individuals were grouped into 26 populations and five superpopulations (AFR, AMR, EAS, EUR and SAS) using 1kGP metadata.

**NA19054-based validation of a diagnostic target for *LILRA7*-supporting short reads**

The leukocyte immunoglobulin-like receptor (LILR) cluster contains extensive sequence homology, which can complicate locus-resolved quantification from short reads. To empirically determine where *LILRA7*-supporting srWGS reads map within the standard 1kGP alignment framework (GRCh38/hs38DH, including decoy/alt contigs), we performed a validation using NA19054, for which an assembled centromeric sequence spanning the RPS9–LAIR1 interval (“LILR_centro”) was available.

High-coverage srWGS reads from NA19054 were aligned to the LILR_centro assembly, and read pairs overlapping predefined *LILRA7* intervals were selected. *LILRA7* windows on LILR_centro were defined as 102,000–107,500 and 108,000–113,500. To ensure high-confidence read selection, we retained only reads that were properly paired, had mapping quality (MAPQ) ≥60, and had template length ≤1,000 bp. Unique read names passing these filters were collected and recorded per sample.

To determine where these *LILRA7*-supporting reads align in the standard reference used by 1kGP, we extracted the corresponding read pairs from the original NA19054 alignment file (GRCh38/hs38DH), preserving the original alignment context including decoy and alternate contig mappings, and generated an indexed BAM for inspection. We then tallied the reference sequences to which the retrieved *LILRA7*-supporting reads aligned. This tracing analysis showed that *LILRA7*-supporting reads were strongly enriched among mappings to the decoy contig chrUn_JTFH01000276v1_decoy. Based on this empirical enrichment, we adopted mapped read depth on chrUn_JTFH01000276v1_decoy as a robust locus-level proxy for *LILRA7* gene content in cohort-scale analyses.

**Cohort-wide read-count quantification on chrUn_JTFH01000276v1_decoy**

Guided by the NA19054 validation, we quantified, for each of the 2,504 unrelated 1kGP individuals, the number of reads mapping to chrUn_JTFH01000276v1_decoy in GRCh38/hs38DH alignments under the same stringent constraints used in validation: properly paired reads, MAPQ ≥60, and template length ≤1,000 bp. The resulting per-sample mapped read count served as the single locus-level statistic for *LILRA7* copy-number inference.

**Diploid copy-number calling (CN0/CN1/CN2) from read counts**

We assigned diploid copy-number states for *LILRA7* from per-sample mapped read counts using a three-component Gaussian likelihood model representing CN0, CN1 and CN2. Properly paired reads were counted after applying mapping filters (mapping quality ≥60; template length ≤1,000 bp). The CN0 distribution was estimated empirically from near-zero counts (read count ≤5). The CN1 distribution was estimated from samples with counts >5 after trimming the upper 5% of values to reduce the influence of rare high-count outliers. The CN2 distribution was parameterised by fixing its mean to 2×mean(CN1) and its standard deviation to ×SD(CN1), consistent with a CN2 state reflecting the sum of two independent CN1-like contributions. For each sample, likelihoods under CN0/CN1/CN2 were computed and the diploid CN state maximizing likelihood was assigned.

**Haplotype-level (haploid) summaries derived from diploid calls**

To summarise allele-level (haplotype-level) presence/absence, diploid calls were decomposed into haploid counts under a biallelic gene-content model (absence versus presence of one copy per haplotype): CN0 → (CN0,CN1) = (2,0), CN1 → (1,1), and CN2 → (0,2). Haploid fractions were then aggregated by population and by superpopulation (AFR, AMR, EAS, EUR, SAS) for visualization and downstream comparisons.

**Visualization**

Five plots were generated for the main text in the following order: (i) the distribution of mapped read counts coloured by diploid CN call, (ii–iii) stacked-bar summaries of diploid CN fractions by superpopulation and by population, and (iv–v) stacked-bar summaries of haploid absence/presence fractions by superpopulation and by population.
