# Supplementary material
Source: Research Square preprint supplement (doi:10.21203/rs.3.rs-9135254/v1)
Supplement: Supplementary file 2 [file fb4d6fc15fa16a1f02b1a316.xlsx]

## Sheet: counts
sampleid	count	source	log1p_count	cn_call	cn_prob	popname	gpopname	sampleID	fatherID	motherID	sex	is_child	haploid_status	is_unrelated	related_status
HG00096	0	HG00096.LILRA7.tsv	0	0	1	GBR	EUR	HG00096	0	0	1	FALSE	haploid	TRUE	unrelated
HG00097	0	HG00097.LILRA7.tsv	0	0	1	GBR	EUR	HG00097	0	0	2	FALSE	haploid	TRUE	unrelated
HG00099	0	HG00099.LILRA7.tsv	0	0	1	GBR	EUR	HG00099	0	0	2	FALSE	haploid	TRUE	unrelated
HG00100	0	HG00100.LILRA7.tsv	0	0	1	GBR	EUR	HG00100	0	0	2	FALSE	haploid	TRUE	unrelated
HG00101	0	HG00101.LILRA7.tsv	0	0	1	GBR	EUR	HG00101	0	0	1	FALSE	haploid	TRUE	unrelated
HG00102	0	HG00102.LILRA7.tsv	0	0	1	GBR	EUR	HG00102	0	0	2	FALSE	haploid	TRUE	unrelated
HG00103	0	HG00103.LILRA7.tsv	0	0	1	GBR	EUR	HG00103	0	0	1	FALSE	haploid	TRUE	unrelated
HG00105	0	HG00105.LILRA7.tsv	0	0	1	GBR	EUR	HG00105	0	0	1	FALSE	haploid	TRUE	unrelated
HG00106	0	HG00106.LILRA7.tsv	0	0	1	GBR	EUR	HG00106	0	0	2	FALSE	haploid	TRUE	unrelated
HG00107	0	HG00107.LILRA7.tsv	0	0	1	GBR	EUR	HG00107	0	0	1	FALSE	haploid	TRUE	unrelated
HG00108	0	HG00108.LILRA7.tsv	0	0	1	GBR	EUR	HG00108	0	0	1	FALSE	haploid	TRUE	unrelated
HG00109	0	HG00109.LILRA7.tsv	0	0	1	GBR	EUR	HG00109	0	0	1	FALSE	haploid	TRUE	unrelated
HG00110	0	HG00110.LILRA7.tsv	0	0	1	GBR	EUR	HG00110	0	0	2	FALSE	haploid	TRUE	unrelated
HG00111	0	HG00111.LILRA7.tsv	0	0	1	GBR	EUR	HG00111	0	0	2	FALSE	haploid	TRUE	unrelated
HG00112	0	HG00112.LILRA7.tsv	0	0	1	GBR	EUR	HG00112	0	0	1	FALSE	haploid	TRUE	unrelated
HG00113	0	HG00113.LILRA7.tsv	0	0	1	GBR	EUR	HG00113	0	0	1	FALSE	haploid	TRUE	unrelated
HG00114	0	HG00114.LILRA7.tsv	0	0	1	GBR	EUR	HG00114	0	0	1	FALSE	haploid	TRUE	unrelated
HG00115	0	HG00115.LILRA7.tsv	0	0	1	GBR	EUR	HG00115	0	0	1	FALSE	haploid	TRUE	unrelated
HG00116	0	HG00116.LILRA7.tsv	0	0	1	GBR	EUR	HG00116	0	0	1	FALSE	haploid	TRUE	unrelated
HG00117	0	HG00117.LILRA7.tsv	0	0	1	GBR	EUR	HG00117	0	0	1	FALSE	haploid	TRUE	unrelated
HG00118	0	HG00118.LILRA7.tsv	0	0	1	GBR	EUR	HG00118	0	0	2	FALSE	haploid	TRUE	unrelated
HG00119	0	HG00119.LILRA7.tsv	0	0	1	GBR	EUR	HG00119	0	0	1	FALSE	haploid	TRUE	unrelated
HG00120	0	HG00120.LILRA7.tsv	0	0	1	GBR	EUR	HG00120	0	0	2	FALSE	haploid	TRUE	unrelated
HG00121	0	HG00121.LILRA7.tsv	0	0	1	GBR	EUR	HG00121	0	0	2	FALSE	haploid	TRUE	unrelated
HG00122	0	HG00122.LILRA7.tsv	0	0	1	GBR	EUR	HG00122	0	0	2	FALSE	haploid	TRUE	unrelated
HG00123	0	HG00123.LILRA7.tsv	0	0	1	GBR	EUR	HG00123	0	0	2	FALSE	haploid	TRUE	unrelated
HG00125	0	HG00125.LILRA7.tsv	0	0	1	GBR	EUR	HG00125	0	0	2	FALSE	haploid	TRUE	unrelated
HG00126	0	HG00126.LILRA7.tsv	0	0	1	GBR	EUR	HG00126	0	0	1	FALSE	haploid	TRUE	unrelated
HG00127	0	HG00127.LILRA7.tsv	0	0	1	GBR	EUR	HG00127	0	0	2	FALSE	haploid	TRUE	unrelated
HG00128	0	HG00128.LILRA7.tsv	0	0	1	GBR	EUR	HG00128	0	0	2	FALSE	haploid	TRUE	unrelated
HG00129	0	HG00129.LILRA7.tsv	0	0	1	GBR	EUR	HG00129	0	0	1	FALSE	haploid	TRUE	unrelated
HG00130	0	HG00130.LILRA7.tsv	0	0	1	GBR	EUR	HG00130	0	0	2	FALSE	haploid	TRUE	unrelated
HG00131	0	HG00131.LILRA7.tsv	0	0	1	GBR	EUR	HG00131	0	0	1	FALSE	haploid	TRUE	unrelated
HG00132	0	HG00132.LILRA7.tsv	0	0	1	GBR	EUR	HG00132	0	0	2	FALSE	haploid	TRUE	unrelated
HG00133	0	HG00133.LILRA7.tsv	0	0	1	GBR	EUR	HG00133	0	0	2	FALSE	haploid	TRUE	unrelated
HG00136	0	HG00136.LILRA7.tsv	0	0	1	GBR	EUR	HG00136	0	0	1	FALSE	haploid	TRUE	unrelated
HG00137	0	HG00137.LILRA7.tsv	0	0	1	GBR	EUR	HG00137	0	0	2	FALSE	haploid	TRUE	unrelated
HG00138	0	HG00138.LILRA7.tsv	0	0	1	GBR	EUR	HG00138	0	0	1	FALSE	haploid	TRUE	unrelated
HG00139	0	HG00139.LILRA7.tsv	0	0	1	GBR	EUR	HG00139	0	0	1	FALSE	haploid	TRUE	unrelated
HG00140	0	HG00140.LILRA7.tsv	0	0	1	GBR	EUR	HG00140	0	0	1	FALSE	haploid	TRUE	unrelated
HG00141	0	HG00141.LILRA7.tsv	0	0	1	GBR	EUR	HG00141	0	0	1	FALSE	haploid	TRUE	unrelated
HG00142	0	HG00142.LILRA7.tsv	0	0	1	GBR	EUR	HG00142	0	0	1	FALSE	haploid	TRUE	unrelated
HG00143	0	HG00143.LILRA7.tsv	0	0	1	GBR	EUR	HG00143	0	0	1	FALSE	haploid	TRUE	unrelated
HG00145	0	HG00145.LILRA7.tsv	0	0	1	GBR	EUR	HG00145	0	0	1	FALSE	haploid	TRUE	unrelated
HG00146	0	HG00146.LILRA7.tsv	0	0	1	GBR	EUR	HG00146	0	0	2	FALSE	haploid	TRUE	unrelated
HG00148	0	HG00148.LILRA7.tsv	0	0	1	GBR	EUR	HG00148	0	0	1	FALSE	haploid	TRUE	unrelated
HG00149	0	HG00149.LILRA7.tsv	0	0	1	GBR	EUR	HG00149	0	0	1	FALSE	haploid	TRUE	unrelated
HG00150	0	HG00150.LILRA7.tsv	0	0	1	GBR	EUR	HG00150	0	0	2	FALSE	haploid	TRUE	unrelated
HG00151	0	HG00151.LILRA7.tsv	0	0	1	GBR	EUR	HG00151	0	0	1	FALSE	haploid	TRUE	unrelated
HG00154	0	HG00154.LILRA7.tsv	0	0	1	GBR	EUR	HG00154	0	0	2	FALSE	haploid	TRUE	unrelated
HG00155	0	HG00155.LILRA7.tsv	0	0	1	GBR	EUR	HG00155	0	0	1	FALSE	haploid	TRUE	unrelated
HG00157	0	HG00157.LILRA7.tsv	0	0	1	GBR	EUR	HG00157	0	0	1	FALSE	haploid	TRUE	unrelated
HG00158	0	HG00158.LILRA7.tsv	0	0	1	GBR	EUR	HG00158	0	0	2	FALSE	haploid	TRUE	unrelated
HG00159	0	HG00159.LILRA7.tsv	0	0	1	GBR	EUR	HG00159	0	0	1	FALSE	haploid	TRUE	unrelated
HG00160	0	HG00160.LILRA7.tsv	0	0	1	GBR	EUR	HG00160	0	0	1	FALSE	haploid	TRUE	unrelated
HG00171	0	HG00171.LILRA7.tsv	0	0	1	FIN	EUR	HG00171	0	0	2	FALSE	haploid	TRUE	unrelated
HG00173	0	HG00173.LILRA7.tsv	0	0	1	FIN	EUR	HG00173	0	0	2	FALSE	haploid	TRUE	unrelated
HG00174	0	HG00174.LILRA7.tsv	0	0	1	FIN	EUR	HG00174	0	0	2	FALSE	haploid	TRUE	unrelated
HG00176	0	HG00176.LILRA7.tsv	0	0	1	FIN	EUR	HG00176	0	0	2	FALSE	haploid	TRUE	unrelated
HG00177	0	HG00177.LILRA7.tsv	0	0	1	FIN	EUR	HG00177	0	0	2	FALSE	haploid	TRUE	unrelated
HG00178	0	HG00178.LILRA7.tsv	0	0	1	FIN	EUR	HG00178	0	0	2	FALSE	haploid	TRUE	unrelated
HG00179	0	HG00179.LILRA7.tsv	0	0	1	FIN	EUR	HG00179	0	0	2	FALSE	haploid	TRUE	unrelated
HG00180	0	HG00180.LILRA7.tsv	0	0	1	FIN	EUR	HG00180	0	0	2	FALSE	haploid	TRUE	unrelated
HG00181	0	HG00181.LILRA7.tsv	0	0	1	FIN	EUR	HG00181	0	0	1	FALSE	haploid	TRUE	unrelated
HG00182	0	HG00182.LILRA7.tsv	0	0	1	FIN	EUR	HG00182	0	0	1	FALSE	haploid	TRUE	unrelated
HG00183	0	HG00183.LILRA7.tsv	0	0	1	FIN	EUR	HG00183	0	0	1	FALSE	haploid	TRUE	unrelated
HG00185	0	HG00185.LILRA7.tsv	0	0	1	FIN	EUR	HG00185	0	0	1	FALSE	haploid	TRUE	unrelated
HG00186	0	HG00186.LILRA7.tsv	0	0	1	FIN	EUR	HG00186	0	0	1	FALSE	haploid	TRUE	unrelated
HG00187	0	HG00187.LILRA7.tsv	0	0	1	FIN	EUR	HG00187	0	0	1	FALSE	haploid	TRUE	unrelated
HG00188	0	HG00188.LILRA7.tsv	0	0	1	FIN	EUR	HG00188	0	0	1	FALSE	haploid	TRUE	unrelated
HG00189	0	HG00189.LILRA7.tsv	0	0	1	FIN	EUR	HG00189	0	0	1	FALSE	haploid	TRUE	unrelated
HG00190	0	HG00190.LILRA7.tsv	0	0	1	FIN	EUR	HG00190	0	0	1	FALSE	haploid	TRUE	unrelated
HG00231	0	HG00231.LILRA7.tsv	0	0	1	GBR	EUR	HG00231	0	0	2	FALSE	haploid	TRUE	unrelated
HG00232	0	HG00232.LILRA7.tsv	0	0	1	GBR	EUR	HG00232	0	0	2	FALSE	haploid	TRUE	unrelated
HG00233	0	HG00233.LILRA7.tsv	0	0	1	GBR	EUR	HG00233	0	0	2	FALSE	haploid	TRUE	unrelated
HG00234	0	HG00234.LILRA7.tsv	0	0	1	GBR	EUR	HG00234	0	0	1	FALSE	haploid	TRUE	unrelated
HG00235	0	HG00235.LILRA7.tsv	0	0	1	GBR	EUR	HG00235	0	0	2	FALSE	haploid	TRUE	unrelated
HG00236	0	HG00236.LILRA7.tsv	0	0	1	GBR	EUR	HG00236	0	0	2	FALSE	haploid	TRUE	unrelated
HG00237	0	HG00237.LILRA7.tsv	0	0	1	GBR	EUR	HG00237	0	0	2	FALSE	haploid	TRUE	unrelated
HG00238	0	HG00238.LILRA7.tsv	0	0	1	GBR	EUR	HG00238	0	0	2	FALSE	haploid	TRUE	unrelated
HG00239	0	HG00239.LILRA7.tsv	0	0	1	GBR	EUR	HG00239	0	0	2	FALSE	haploid	TRUE	unrelated
HG00240	0	HG00240.LILRA7.tsv	0	0	1	GBR	EUR	HG00240	0	0	2	FALSE	haploid	TRUE	unrelated
HG00242	0	HG00242.LILRA7.tsv	0	0	1	GBR	EUR	HG00242	0	0	1	FALSE	haploid	TRUE	unrelated
HG00243	0	HG00243.LILRA7.tsv	0	0	1	GBR	EUR	HG00243	0	0	1	FALSE	haploid	TRUE	unrelated
HG00244	0	HG00244.LILRA7.tsv	0	0	1	GBR	EUR	HG00244	0	0	1	FALSE	haploid	TRUE	unrelated
HG00245	0	HG00245.LILRA7.tsv	0	0	1	GBR	EUR	HG00245	0	0	2	FALSE	haploid	TRUE	unrelated
HG00246	0	HG00246.LILRA7.tsv	0	0	1	GBR	EUR	HG00246	0	0	1	FALSE	haploid	TRUE	unrelated
HG00250	0	HG00250.LILRA7.tsv	0	0	1	GBR	EUR	HG00250	0	0	2	FALSE	haploid	TRUE	unrelated
HG00251	0	HG00251.LILRA7.tsv	0	0	1	GBR	EUR	HG00251	0	0	1	FALSE	haploid	TRUE	unrelated
HG00252	0	HG00252.LILRA7.tsv	0	0	1	GBR	EUR	HG00252	0	0	1	FALSE	haploid	TRUE	unrelated
HG00253	0	HG00253.LILRA7.tsv	0	0	1	GBR	EUR	HG00253	0	0	2	FALSE	haploid	TRUE	unrelated
HG00254	0	HG00254.LILRA7.tsv	0	0	1	GBR	EUR	HG00254	0	0	2	FALSE	haploid	TRUE	unrelated
HG00255	0	HG00255.LILRA7.tsv	0	0	1	GBR	EUR	HG00255	0	0	2	FALSE	haploid	TRUE	unrelated
HG00256	0	HG00256.LILRA7.tsv	0	0	1	GBR	EUR	HG00256	0	0	1	FALSE	haploid	TRUE	unrelated
HG00257	0	HG00257.LILRA7.tsv	0	0	1	GBR	EUR	HG00257	0	0	2	FALSE	haploid	TRUE	unrelated
HG00258	0	HG00258.LILRA7.tsv	0	0	1	GBR	EUR	HG00258	0	0	2	FALSE	haploid	TRUE	unrelated
HG00259	0	HG00259.LILRA7.tsv	0	0	1	GBR	EUR	HG00259	0	0	2	FALSE	haploid	TRUE	unrelated
HG00260	0	HG00260.LILRA7.tsv	0	0	1	GBR	EUR	HG00260	0	0	1	FALSE	haploid	TRUE	unrelated
HG00261	0	HG00261.LILRA7.tsv	0	0	1	GBR	EUR	HG00261	0	0	2	FALSE	haploid	TRUE	unrelated
HG00262	0	HG00262.LILRA7.tsv	0	0	1	GBR	EUR	HG00262	0	0	2	FALSE	haploid	TRUE	unrelated
HG00263	0	HG00263.LILRA7.tsv	0	0	1	GBR	EUR	HG00263	0	0	2	FALSE	haploid	TRUE	unrelated
HG00264	0	HG00264.LILRA7.tsv	0	0	1	GBR	EUR	HG00264	0	0	1	FALSE	haploid	TRUE	unrelated
HG00265	0	HG00265.LILRA7.tsv	0	0	1	GBR	EUR	HG00265	0	0	1	FALSE	haploid	TRUE	unrelated
HG00266	0	HG00266.LILRA7.tsv	0	0	1	FIN	EUR	HG00266	0	0	2	FALSE	haploid	TRUE	unrelated
HG00267	0	HG00267.LILRA7.tsv	0	0	1	FIN	EUR	HG00267	0	0	1	FALSE	haploid	TRUE	unrelated
HG00268	0	HG00268.LILRA7.tsv	0	0	1	FIN	EUR	HG00268	0	0	2	FALSE	haploid	TRUE	unrelated
HG00269	0	HG00269.LILRA7.tsv	0	0	1	FIN	EUR	HG00269	0	0	2	FALSE	haploid	TRUE	unrelated
HG00271	0	HG00271.LILRA7.tsv	0	0	1	FIN	EUR	HG00271	0	0	1	FALSE	haploid	TRUE	unrelated
HG00272	0	HG00272.LILRA7.tsv	0	0	1	FIN	EUR	HG00272	0	0	2	FALSE	haploid	TRUE	unrelated
HG00273	0	HG00273.LILRA7.tsv	0	0	1	FIN	EUR	HG00273	0	0	1	FALSE	haploid	TRUE	unrelated
HG00274	0	HG00274.LILRA7.tsv	0	0	1	FIN	EUR	HG00274	0	0	2	FALSE	haploid	TRUE	unrelated
HG00275	0	HG00275.LILRA7.tsv	0	0	1	FIN	EUR	HG00275	0	0	2	FALSE	haploid	TRUE	unrelated
HG00276	0	HG00276.LILRA7.tsv	0	0	1	FIN	EUR	HG00276	0	0	2	FALSE	haploid	TRUE	unrelated
HG00277	0	HG00277.LILRA7.tsv	0	0	1	FIN	EUR	HG00277	0	0	1	FALSE	haploid	TRUE	unrelated
HG00278	0	HG00278.LILRA7.tsv	0	0	1	FIN	EUR	HG00278	0	0	1	FALSE	haploid	TRUE	unrelated
HG00280	0	HG00280.LILRA7.tsv	0	0	1	FIN	EUR	HG00280	0	0	1	FALSE	haploid	TRUE	unrelated
HG00281	0	HG00281.LILRA7.tsv	0	0	1	FIN	EUR	HG00281	0	0	2	FALSE	haploid	TRUE	unrelated
HG00282	0	HG00282.LILRA7.tsv	0	0	1	FIN	EUR	HG00282	0	0	2	FALSE	haploid	TRUE	unrelated
HG00284	0	HG00284.LILRA7.tsv	0	0	1	FIN	EUR	HG00284	0	0	1	FALSE	haploid	TRUE	unrelated
HG00285	0	HG00285.LILRA7.tsv	0	0	1	FIN	EUR	HG00285	0	0	2	FALSE	haploid	TRUE	unrelated
HG00288	0	HG00288.LILRA7.tsv	0	0	1	FIN	EUR	HG00288	0	0	2	FALSE	haploid	TRUE	unrelated
HG00290	0	HG00290.LILRA7.tsv	0	0	1	FIN	EUR	HG00290	0	0	1	FALSE	haploid	TRUE	unrelated
HG00304	0	HG00304.LILRA7.tsv	0	0	1	FIN	EUR	HG00304	0	0	2	FALSE	haploid	TRUE	unrelated
HG00306	0	HG00306.LILRA7.tsv	0	0	1	FIN	EUR	HG00306	0	0	2	FALSE	haploid	TRUE	unrelated
HG00308	0	HG00308.LILRA7.tsv	0	0	1	FIN	EUR	HG00308	0	0	1	FALSE	haploid	TRUE	unrelated
HG00309	0	HG00309.LILRA7.tsv	0	0	1	FIN	EUR	HG00309	0	0	2	FALSE	haploid	TRUE	unrelated
HG00310	0	HG00310.LILRA7.tsv	0	0	1	FIN	EUR	HG00310	0	0	1	FALSE	haploid	TRUE	unrelated
HG00311	0	HG00311.LILRA7.tsv	0	0	1	FIN	EUR	HG00311	0	0	1	FALSE	haploid	TRUE	unrelated
HG00313	0	HG00313.LILRA7.tsv	0	0	1	FIN	EUR	HG00313	0	0	2	FALSE	haploid	TRUE	unrelated
HG00315	0	HG00315.LILRA7.tsv	0	0	1	FIN	EUR	HG00315	0	0	2	FALSE	haploid	TRUE	unrelated
HG00318	0	HG00318.LILRA7.tsv	0	0	1	FIN	EUR	HG00318	0	0	2	FALSE	haploid	TRUE	unrelated
HG00319	0	HG00319.LILRA7.tsv	0	0	1	FIN	EUR	HG00319	0	0	2	FALSE	haploid	TRUE	unrelated
HG00320	0	HG00320.LILRA7.tsv	0	0	1	FIN	EUR	HG00320	0	0	2	FALSE	haploid	TRUE	unrelated
HG00321	0	HG00321.LILRA7.tsv	0	0	1	FIN	EUR	HG00321	0	0	1	FALSE	haploid	TRUE	unrelated
HG00323	0	HG00323.LILRA7.tsv	0	0	1	FIN	EUR	HG00323	0	0	2	FALSE	haploid	TRUE	unrelated
HG00324	0	HG00324.LILRA7.tsv	0	0	1	FIN	EUR	HG00324	0	0	2	FALSE	haploid	TRUE	unrelated
HG00325	0	HG00325.LILRA7.tsv	0	0	1	FIN	EUR	HG00325	0	0	1	FALSE	haploid	TRUE	unrelated
HG00326	0	HG00326.LILRA7.tsv	0	0	1	FIN	EUR	HG00326	0	0	2	FALSE	haploid	TRUE	unrelated
HG00327	0	HG00327.LILRA7.tsv	0	0	1	FIN	EUR	HG00327	0	0	2	FALSE	haploid	TRUE	unrelated
HG00328	0	HG00328.LILRA7.tsv	0	0	1	FIN	EUR	HG00328	0	0	2	FALSE	haploid	TRUE	unrelated
HG00329	0	HG00329.LILRA7.tsv	0	0	1	FIN	EUR	HG00329	0	0	1	FALSE	haploid	TRUE	unrelated
HG00330	0	HG00330.LILRA7.tsv	0	0	1	FIN	EUR	HG00330	0	0	2	FALSE	haploid	TRUE	unrelated
HG00331	0	HG00331.LILRA7.tsv	0	0	1	FIN	EUR	HG00331	0	0	2	FALSE	haploid	TRUE	unrelated
HG00332	0	HG00332.LILRA7.tsv	0	0	1	FIN	EUR	HG00332	0	0	2	FALSE	haploid	TRUE	unrelated
HG00334	0	HG00334.LILRA7.tsv	0	0	1	FIN	EUR	HG00334	0	0	2	FALSE	haploid	TRUE	unrelated
HG00335	0	HG00335.LILRA7.tsv	0	0	1	FIN	EUR	HG00335	0	0	1	FALSE	haploid	TRUE	unrelated
HG00336	0	HG00336.LILRA7.tsv	0	0	1	FIN	EUR	HG00336	0	0	1	FALSE	haploid	TRUE	unrelated
HG00337	0	HG00337.LILRA7.tsv	0	0	1	FIN	EUR	HG00337	0	0	2	FALSE	haploid	TRUE	unrelated
HG00338	0	HG00338.LILRA7.tsv	0	0	1	FIN	EUR	HG00338	0	0	1	FALSE	haploid	TRUE	unrelated
HG00339	0	HG00339.LILRA7.tsv	0	0	1	FIN	EUR	HG00339	0	0	2	FALSE	haploid	TRUE	unrelated
HG00341	0	HG00341.LILRA7.tsv	0	0	1	FIN	EUR	HG00341	0	0	1	FALSE	haploid	TRUE	unrelated
HG00342	0	HG00342.LILRA7.tsv	0	0	1	FIN	EUR	HG00342	0	0	1	FALSE	haploid	TRUE	unrelated
HG00343	0	HG00343.LILRA7.tsv	0	0	1	FIN	EUR	HG00343	0	0	2	FALSE	haploid	TRUE	unrelated
HG00344	0	HG00344.LILRA7.tsv	0	0	1	FIN	EUR	HG00344	0	0	2	FALSE	haploid	TRUE	unrelated
HG00345	0	HG00345.LILRA7.tsv	0	0	1	FIN	EUR	HG00345	0	0	1	FALSE	haploid	TRUE	unrelated
HG00346	0	HG00346.LILRA7.tsv	0	0	1	FIN	EUR	HG00346	0	0	2	FALSE	haploid	TRUE	unrelated
HG00349	0	HG00349.LILRA7.tsv	0	0	1	FIN	EUR	HG00349	0	0	2	FALSE	haploid	TRUE	unrelated
HG00350	0	HG00350.LILRA7.tsv	0	0	1	FIN	EUR	HG00350	0	0	2	FALSE	haploid	TRUE	unrelated
HG00351	0	HG00351.LILRA7.tsv	0	0	1	FIN	EUR	HG00351	0	0	1	FALSE	haploid	TRUE	unrelated
HG00353	0	HG00353.LILRA7.tsv	0	0	1	FIN	EUR	HG00353	0	0	2	FALSE	haploid	TRUE	unrelated
HG00355	0	HG00355.LILRA7.tsv	0	0	1	FIN	EUR	HG00355	0	0	2	FALSE	haploid	TRUE	unrelated
HG00356	0	HG00356.LILRA7.tsv	0	0	1	FIN	EUR	HG00356	0	0	2	FALSE	haploid	TRUE	unrelated
HG00357	0	HG00357.LILRA7.tsv	0	0	1	FIN	EUR	HG00357	0	0	2	FALSE	haploid	TRUE	unrelated
HG00358	0	HG00358.LILRA7.tsv	0	0	1	FIN	EUR	HG00358	0	0	1	FALSE	haploid	TRUE	unrelated
HG00360	0	HG00360.LILRA7.tsv	0	0	1	FIN	EUR	HG00360	0	0	1	FALSE	haploid	TRUE	unrelated
HG00361	0	HG00361.LILRA7.tsv	0	0	1	FIN	EUR	HG00361	0	0	2	FALSE	haploid	TRUE	unrelated
HG00362	0	HG00362.LILRA7.tsv	0	0	1	FIN	EUR	HG00362	0	0	2	FALSE	haploid	TRUE	unrelated
HG00364	0	HG00364.LILRA7.tsv	0	0	1	FIN	EUR	HG00364	0	0	2	FALSE	haploid	TRUE	unrelated
HG00365	0	HG00365.LILRA7.tsv	0	0	1	FIN	EUR	HG00365	0	0	2	FALSE	haploid	TRUE	unrelated
HG00366	0	HG00366.LILRA7.tsv	0	0	1	FIN	EUR	HG00366	0	0	1	FALSE	haploid	TRUE	unrelated
HG00367	0	HG00367.LILRA7.tsv	0	0	1	FIN	EUR	HG00367	0	0	2	FALSE	haploid	TRUE	unrelated
HG00368	0	HG00368.LILRA7.tsv	0	0	1	FIN	EUR	HG00368	0	0	2	FALSE	haploid	TRUE	unrelated
HG00369	0	HG00369.LILRA7.tsv	0	0	1	FIN	EUR	HG00369	0	0	1	FALSE	haploid	TRUE	unrelated
HG00371	0	HG00371.LILRA7.tsv	0	0	1	FIN	EUR	HG00371	0	0	1	FALSE	haploid	TRUE	unrelated
HG00372	0	HG00372.LILRA7.tsv	0	0	1	FIN	EUR	HG00372	0	0	1	FALSE	haploid	TRUE	unrelated
HG00373	0	HG00373.LILRA7.tsv	0	0	1	FIN	EUR	HG00373	0	0	2	FALSE	haploid	TRUE	unrelated
HG00375	0	HG00375.LILRA7.tsv	0	0	1	FIN	EUR	HG00375	0	0	1	FALSE	haploid	TRUE	unrelated
HG00376	0	HG00376.LILRA7.tsv	0	0	1	FIN	EUR	HG00376	0	0	2	FALSE	haploid	TRUE	unrelated
HG00378	0	HG00378.LILRA7.tsv	0	0	1	FIN	EUR	HG00378	0	0	2	FALSE	haploid	TRUE	unrelated
HG00379	0	HG00379.LILRA7.tsv	0	0	1	FIN	EUR	HG00379	0	0	2	FALSE	haploid	TRUE	unrelated
HG00380	0	HG00380.LILRA7.tsv	0	0	1	FIN	EUR	HG00380	0	0	2	FALSE	haploid	TRUE	unrelated
HG00381	0	HG00381.LILRA7.tsv	0	0	1	FIN	EUR	HG00381	0	0	2	FALSE	haploid	TRUE	unrelated
HG00382	0	HG00382.LILRA7.tsv	0	0	1	FIN	EUR	HG00382	0	0	1	FALSE	haploid	TRUE	unrelated
HG00383	0	HG00383.LILRA7.tsv	0	0	1	FIN	EUR	HG00383	0	0	2	FALSE	haploid	TRUE	unrelated
HG00384	0	HG00384.LILRA7.tsv	0	0	1	FIN	EUR	HG00384	0	0	2	FALSE	haploid	TRUE	unrelated
HG00403	0	HG00403.LILRA7.tsv	0	0	1	CHS	EAS	HG00403	0	0	1	FALSE	haploid	TRUE	unrelated
HG00404	0	HG00404.LILRA7.tsv	0	0	1	CHS	EAS	HG00404	0	0	2	FALSE	haploid	TRUE	unrelated
HG00406	0	HG00406.LILRA7.tsv	0	0	1	CHS	EAS	HG00406	0	0	1	FALSE	haploid	TRUE	unrelated
HG00407	0	HG00407.LILRA7.tsv	0	0	1	CHS	EAS	HG00407	0	0	2	FALSE	haploid	TRUE	unrelated
HG00409	0	HG00409.LILRA7.tsv	0	0	1	CHS	EAS	HG00409	0	0	1	FALSE	haploid	TRUE	unrelated
HG00410	0	HG00410.LILRA7.tsv	0	0	1	CHS	EAS	HG00410	0	0	2	FALSE	haploid	TRUE	unrelated
HG00419	0	HG00419.LILRA7.tsv	0	0	1	CHS	EAS	HG00419	0	0	2	FALSE	haploid	TRUE	unrelated
HG00421	0	HG00421.LILRA7.tsv	0	0	1	CHS	EAS	HG00421	0	0	1	FALSE	haploid	TRUE	unrelated
HG00422	0	HG00422.LILRA7.tsv	0	0	1	CHS	EAS	HG00422	0	0	2	FALSE	haploid	TRUE	unrelated
HG00428	0	HG00428.LILRA7.tsv	0	0	1	CHS	EAS	HG00428	0	0	2	FALSE	haploid	TRUE	unrelated
HG00436	0	HG00436.LILRA7.tsv	0	0	1	CHS	EAS	HG00436	0	0	1	FALSE	haploid	TRUE	unrelated
HG00437	0	HG00437.LILRA7.tsv	0	0	1	CHS	EAS	HG00437	0	0	2	FALSE	haploid	TRUE	unrelated
HG00442	0	HG00442.LILRA7.tsv	0	0	1	CHS	EAS	HG00442	0	0	1	FALSE	haploid	TRUE	unrelated
HG00443	0	HG00443.LILRA7.tsv	0	0	1	CHS	EAS	HG00443	0	0	2	FALSE	haploid	TRUE	unrelated
HG00445	0	HG00445.LILRA7.tsv	0	0	1	CHS	EAS	HG00445	0	0	1	FALSE	haploid	TRUE	unrelated
HG00446	0	HG00446.LILRA7.tsv	0	0	1	CHS	EAS	HG00446	0	0	2	FALSE	haploid	TRUE	unrelated
HG00448	0	HG00448.LILRA7.tsv	0	0	1	CHS	EAS	HG00448	0	0	1	FALSE	haploid	TRUE	unrelated
HG00449	196	HG00449.LILRA7.tsv	5.2832	1	1	CHS	EAS	HG00449	0	0	2	FALSE	haploid	TRUE	unrelated
HG00451	0	HG00451.LILRA7.tsv	0	0	1	CHS	EAS	HG00451	0	0	1	FALSE	haploid	TRUE	unrelated
HG00452	0	HG00452.LILRA7.tsv	0	0	1	CHS	EAS	HG00452	0	0	2	FALSE	haploid	TRUE	unrelated
HG00457	0	HG00457.LILRA7.tsv	0	0	1	CHS	EAS	HG00457	0	0	1	FALSE	haploid	TRUE	unrelated
HG00458	0	HG00458.LILRA7.tsv	0	0	1	CHS	EAS	HG00458	0	0	2	FALSE	haploid	TRUE	unrelated
HG00463	0	HG00463.LILRA7.tsv	0	0	1	CHS	EAS	HG00463	0	0	1	FALSE	haploid	TRUE	unrelated
HG00464	0	HG00464.LILRA7.tsv	0	0	1	CHS	EAS	HG00464	0	0	2	FALSE	haploid	TRUE	unrelated
HG00472	0	HG00472.LILRA7.tsv	0	0	1	CHS	EAS	HG00472	0	0	1	FALSE	haploid	TRUE	unrelated
HG00473	0	HG00473.LILRA7.tsv	0	0	1	CHS	EAS	HG00473	0	0	2	FALSE	haploid	TRUE	unrelated
HG00475	0	HG00475.LILRA7.tsv	0	0	1	CHS	EAS	HG00475	0	0	1	FALSE	haploid	TRUE	unrelated
HG00476	0	HG00476.LILRA7.tsv	0	0	1	CHS	EAS	HG00476	0	0	2	FALSE	haploid	TRUE	unrelated
HG00478	0	HG00478.LILRA7.tsv	0	0	1	CHS	EAS	HG00478	0	0	1	FALSE	haploid	TRUE	unrelated
HG00479	0	HG00479.LILRA7.tsv	0	0	1	CHS	EAS	HG00479	0	0	2	FALSE	haploid	TRUE	unrelated
HG00500	0	HG00500.LILRA7.tsv	0	0	1	CHS	EAS	HG00500	0	0	1	FALSE	haploid	TRUE	unrelated
HG00513	0	HG00513.LILRA7.tsv	0	0	1	CHS	EAS	HG00513	0	0	2	FALSE	haploid	TRUE	unrelated
HG00524	0	HG00524.LILRA7.tsv	0	0	1	CHS	EAS	HG00524	0	0	1	FALSE	haploid	TRUE	unrelated
HG00525	0	HG00525.LILRA7.tsv	0	0	1	CHS	EAS	HG00525	0	0	2	FALSE	haploid	TRUE	unrelated
HG00530	0	HG00530.LILRA7.tsv	0	0	1	CHS	EAS	HG00530	0	0	1	FALSE	haploid	TRUE	unrelated
HG00531	0	HG00531.LILRA7.tsv	0	0	1	CHS	EAS	HG00531	0	0	2	FALSE	haploid	TRUE	unrelated
HG00533	0	HG00533.LILRA7.tsv	0	0	1	CHS	EAS	HG00533	0	0	1	FALSE	haploid	TRUE	unrelated
HG00534	266	HG00534.LILRA7.tsv	5.58725	1	0.999987	CHS	EAS	HG00534	0	0	2	FALSE	haploid	TRUE	unrelated
HG00536	0	HG00536.LILRA7.tsv	0	0	1	CHS	EAS	HG00536	0	0	1	FALSE	haploid	TRUE	unrelated
HG00537	0	HG00537.LILRA7.tsv	0	0	1	CHS	EAS	HG00537	0	0	2	FALSE	haploid	TRUE	unrelated
HG00542	0	HG00542.LILRA7.tsv	0	0	1	CHS	EAS	HG00542	0	0	1	FALSE	haploid	TRUE	unrelated
HG00543	0	HG00543.LILRA7.tsv	0	0	1	CHS	EAS	HG00543	0	0	2	FALSE	haploid	TRUE	unrelated
HG00551	0	HG00551.LILRA7.tsv	0	0	1	PUR	AMR	HG00551	0	0	2	FALSE	haploid	TRUE	unrelated
HG00553	0	HG00553.LILRA7.tsv	0	0	1	PUR	AMR	HG00553	0	0	1	FALSE	haploid	TRUE	unrelated
HG00554	0	HG00554.LILRA7.tsv	0	0	1	PUR	AMR	HG00554	0	0	2	FALSE	haploid	TRUE	unrelated
HG00556	0	HG00556.LILRA7.tsv	0	0	1	CHS	EAS	HG00556	0	0	1	FALSE	haploid	TRUE	unrelated
HG00557	0	HG00557.LILRA7.tsv	0	0	1	CHS	EAS	HG00557	0	0	2	FALSE	haploid	TRUE	unrelated
HG00559	0	HG00559.LILRA7.tsv	0	0	1	CHS	EAS	HG00559	0	0	1	FALSE	haploid	TRUE	unrelated
HG00560	0	HG00560.LILRA7.tsv	0	0	1	CHS	EAS	HG00560	0	0	2	FALSE	haploid	TRUE	unrelated
HG00565	0	HG00565.LILRA7.tsv	0	0	1	CHS	EAS	HG00565	0	0	1	FALSE	haploid	TRUE	unrelated
HG00566	0	HG00566.LILRA7.tsv	0	0	1	CHS	EAS	HG00566	0	0	2	FALSE	haploid	TRUE	unrelated
HG00580	0	HG00580.LILRA7.tsv	0	0	1	CHS	EAS	HG00580	0	0	1	FALSE	haploid	TRUE	unrelated
HG00581	0	HG00581.LILRA7.tsv	0	0	1	CHS	EAS	HG00581	0	0	2	FALSE	haploid	TRUE	unrelated
HG00583	0	HG00583.LILRA7.tsv	0	0	1	CHS	EAS	HG00583	0	0	1	FALSE	haploid	TRUE	unrelated
HG00584	0	HG00584.LILRA7.tsv	0	0	1	CHS	EAS	HG00584	0	0	2	FALSE	haploid	TRUE	unrelated
HG00589	0	HG00589.LILRA7.tsv	0	0	1	CHS	EAS	HG00589	0	0	1	FALSE	haploid	TRUE	unrelated
HG00590	0	HG00590.LILRA7.tsv	0	0	1	CHS	EAS	HG00590	0	0	2	FALSE	haploid	TRUE	unrelated
HG00592	0	HG00592.LILRA7.tsv	0	0	1	CHS	EAS	HG00592	0	0	1	FALSE	haploid	TRUE	unrelated
HG00593	0	HG00593.LILRA7.tsv	0	0	1	CHS	EAS	HG00593	0	0	2	FALSE	haploid	TRUE	unrelated
HG00595	0	HG00595.LILRA7.tsv	0	0	1	CHS	EAS	HG00595	0	0	1	FALSE	haploid	TRUE	unrelated
HG00596	0	HG00596.LILRA7.tsv	0	0	1	CHS	EAS	HG00596	0	0	2	FALSE	haploid	TRUE	unrelated
HG00598	0	HG00598.LILRA7.tsv	0	0	1	CHS	EAS	HG00598	0	0	1	FALSE	haploid	TRUE	unrelated
HG00599	0	HG00599.LILRA7.tsv	0	0	1	CHS	EAS	HG00599	0	0	2	FALSE	haploid	TRUE	unrelated
HG00607	0	HG00607.LILRA7.tsv	0	0	1	CHS	EAS	HG00607	0	0	1	FALSE	haploid	TRUE	unrelated
HG00608	0	HG00608.LILRA7.tsv	0	0	1	CHS	EAS	HG00608	0	0	2	FALSE	haploid	TRUE	unrelated
HG00610	0	HG00610.LILRA7.tsv	0	0	1	CHS	EAS	HG00610	0	0	1	FALSE	haploid	TRUE	unrelated
HG00611	0	HG00611.LILRA7.tsv	0	0	1	CHS	EAS	HG00611	0	0	2	FALSE	haploid	TRUE	unrelated
HG00613	0	HG00613.LILRA7.tsv	0	0	1	CHS	EAS	HG00613	0	0	1	FALSE	haploid	TRUE	unrelated
HG00614	0	HG00614.LILRA7.tsv	0	0	1	CHS	EAS	HG00614	0	0	2	FALSE	haploid	TRUE	unrelated
HG00619	0	HG00619.LILRA7.tsv	0	0	1	CHS	EAS	HG00619	0	0	1	FALSE	haploid	TRUE	unrelated
HG00620	512	HG00620.LILRA7.tsv	6.24028	2	0.985869	CHS	EAS	HG00620	0	0	2	FALSE	diploid	TRUE	unrelated
HG00622	0	HG00622.LILRA7.tsv	0	0	1	CHS	EAS	HG00622	0	0	1	FALSE	haploid	TRUE	unrelated
HG00623	0	HG00623.LILRA7.tsv	0	0	1	CHS	EAS	HG00623	0	0	2	FALSE	haploid	TRUE	unrelated
HG00625	0	HG00625.LILRA7.tsv	0	0	1	CHS	EAS	HG00625	0	0	1	FALSE	haploid	TRUE	unrelated
HG00626	0	HG00626.LILRA7.tsv	0	0	1	CHS	EAS	HG00626	0	0	2	FALSE	haploid	TRUE	unrelated
HG00628	0	HG00628.LILRA7.tsv	0	0	1	CHS	EAS	HG00628	0	0	1	FALSE	haploid	TRUE	unrelated
HG00629	0	HG00629.LILRA7.tsv	0	0	1	CHS	EAS	HG00629	0	0	2	FALSE	haploid	TRUE	unrelated
HG00631	0	HG00631.LILRA7.tsv	0	0	1	CHS	EAS	HG00631	0	0	1	FALSE	haploid	TRUE	unrelated
HG00632	0	HG00632.LILRA7.tsv	0	0	1	CHS	EAS	HG00632	0	0	2	FALSE	haploid	TRUE	unrelated
HG00634	0	HG00634.LILRA7.tsv	0	0	1	CHS	EAS	HG00634	0	0	1	FALSE	haploid	TRUE	unrelated
HG00637	0	HG00637.LILRA7.tsv	0	0	1	PUR	AMR	HG00637	0	0	1	FALSE	haploid	TRUE	unrelated
HG00638	0	HG00638.LILRA7.tsv	0	0	1	PUR	AMR	HG00638	0	0	2	FALSE	haploid	TRUE	unrelated
HG00640	0	HG00640.LILRA7.tsv	0	0	1	PUR	AMR	HG00640	0	0	1	FALSE	haploid	TRUE	unrelated
HG00641	0	HG00641.LILRA7.tsv	0	0	1	PUR	AMR	HG00641	0	0	2	FALSE	haploid	TRUE	unrelated
HG00650	0	HG00650.LILRA7.tsv	0	0	1	CHS	EAS	HG00650	0	0	1	FALSE	haploid	TRUE	unrelated
HG00651	0	HG00651.LILRA7.tsv	0	0	1	CHS	EAS	HG00651	0	0	2	FALSE	haploid	TRUE	unrelated
HG00653	0	HG00653.LILRA7.tsv	0	0	1	CHS	EAS	HG00653	0	0	1	FALSE	haploid	TRUE	unrelated
HG00654	0	HG00654.LILRA7.tsv	0	0	1	CHS	EAS	HG00654	0	0	2	FALSE	haploid	TRUE	unrelated
HG00656	0	HG00656.LILRA7.tsv	0	0	1	CHS	EAS	HG00656	0	0	1	FALSE	haploid	TRUE	unrelated
HG00657	0	HG00657.LILRA7.tsv	0	0	1	CHS	EAS	HG00657	0	0	2	FALSE	haploid	TRUE	unrelated
HG00662	0	HG00662.LILRA7.tsv	0	0	1	CHS	EAS	HG00662	0	0	1	FALSE	haploid	TRUE	unrelated
HG00663	0	HG00663.LILRA7.tsv	0	0	1	CHS	EAS	HG00663	0	0	2	FALSE	haploid	TRUE	unrelated
HG00671	0	HG00671.LILRA7.tsv	0	0	1	CHS	EAS	HG00671	0	0	1	FALSE	haploid	TRUE	unrelated
HG00672	0	HG00672.LILRA7.tsv	0	0	1	CHS	EAS	HG00672	0	0	2	FALSE	haploid	TRUE	unrelated
HG00674	0	HG00674.LILRA7.tsv	0	0	1	CHS	EAS	HG00674	0	0	1	FALSE	haploid	TRUE	unrelated
HG00675	0	HG00675.LILRA7.tsv	0	0	1	CHS	EAS	HG00675	0	0	2	FALSE	haploid	TRUE	unrelated
HG00683	0	HG00683.LILRA7.tsv	0	0	1	CHS	EAS	HG00683	0	0	1	FALSE	haploid	TRUE	unrelated
HG00684	0	HG00684.LILRA7.tsv	0	0	1	CHS	EAS	HG00684	0	0	2	FALSE	haploid	TRUE	unrelated
HG00689	0	HG00689.LILRA7.tsv	0	0	1	CHS	EAS	HG00689	0	0	1	FALSE	haploid	TRUE	unrelated
HG00690	0	HG00690.LILRA7.tsv	0	0	1	CHS	EAS	HG00690	0	0	2	FALSE	haploid	TRUE	unrelated
HG00692	0	HG00692.LILRA7.tsv	0	0	1	CHS	EAS	HG00692	0	0	1	FALSE	haploid	TRUE	unrelated
HG00693	0	HG00693.LILRA7.tsv	0	0	1	CHS	EAS	HG00693	0	0	2	FALSE	haploid	TRUE	unrelated
HG00698	0	HG00698.LILRA7.tsv	0	0	1	CHS	EAS	HG00698	0	0	1	FALSE	haploid	TRUE	unrelated
HG00699	0	HG00699.LILRA7.tsv	0	0	1	CHS	EAS	HG00699	0	0	2	FALSE	haploid	TRUE	unrelated
HG00701	0	HG00701.LILRA7.tsv	0	0	1	CHS	EAS	HG00701	0	0	1	FALSE	haploid	TRUE	unrelated
HG00704	0	HG00704.LILRA7.tsv	0	0	1	CHS	EAS	HG00704	0	0	1	FALSE	haploid	TRUE	unrelated
HG00705	0	HG00705.LILRA7.tsv	0	0	1	CHS	EAS	HG00705	0	0	2	FALSE	haploid	TRUE	unrelated
HG00707	0	HG00707.LILRA7.tsv	0	0	1	CHS	EAS	HG00707	0	0	1	FALSE	haploid	TRUE	unrelated
HG00708	0	HG00708.LILRA7.tsv	0	0	1	CHS	EAS	HG00708	0	0	2	FALSE	haploid	TRUE	unrelated
HG00717	0	HG00717.LILRA7.tsv	0	0	1	CHS	EAS	HG00717	0	0	2	FALSE	haploid	TRUE	unrelated
HG00728	0	HG00728.LILRA7.tsv	0	0	1	CHS	EAS	HG00728	0	0	1	FALSE	haploid	TRUE	unrelated
HG00729	0	HG00729.LILRA7.tsv	0	0	1	CHS	EAS	HG00729	0	0	2	FALSE	haploid	TRUE	unrelated
HG00731	0	HG00731.LILRA7.tsv	0	0	1	PUR	AMR	HG00731	0	0	1	FALSE	haploid	TRUE	unrelated
HG00732	0	HG00732.LILRA7.tsv	0	0	1	PUR	AMR	HG00732	0	0	2	FALSE	haploid	TRUE	unrelated
HG00734	0	HG00734.LILRA7.tsv	0	0	1	PUR	AMR	HG00734	0	0	2	FALSE	haploid	TRUE	unrelated
HG00736	0	HG00736.LILRA7.tsv	0	0	1	PUR	AMR	HG00736	0	0	1	FALSE	haploid	TRUE	unrelated
HG00737	0	HG00737.LILRA7.tsv	0	0	1	PUR	AMR	HG00737	0	0	2	FALSE	haploid	TRUE	unrelated
HG00739	0	HG00739.LILRA7.tsv	0	0	1	PUR	AMR	HG00739	0	0	1	FALSE	haploid	TRUE	unrelated
HG00740	0	HG00740.LILRA7.tsv	0	0	1	PUR	AMR	HG00740	0	0	2	FALSE	haploid	TRUE	unrelated
HG00742	0	HG00742.LILRA7.tsv	0	0	1	PUR	AMR	HG00742	0	0	1	FALSE	haploid	TRUE	unrelated
HG00743	0	HG00743.LILRA7.tsv	0	0	1	PUR	AMR	HG00743	0	0	2	FALSE	haploid	TRUE	unrelated
HG00759	0	HG00759.LILRA7.tsv	0	0	1	CDX	EAS	HG00759	0	0	2	FALSE	haploid	TRUE	unrelated
HG00766	0	HG00766.LILRA7.tsv	0	0	1	CDX	EAS	HG00766	0	0	2	FALSE	haploid	TRUE	unrelated
HG00844	0	HG00844.LILRA7.tsv	0	0	1	CDX	EAS	HG00844	0	0	1	FALSE	haploid	TRUE	unrelated
HG00851	0	HG00851.LILRA7.tsv	0	0	1	CDX	EAS	HG00851	0	0	2	FALSE	haploid	TRUE	unrelated
HG00864	0	HG00864.LILRA7.tsv	0	0	1	CDX	EAS	HG00864	0	0	2	FALSE	haploid	TRUE	unrelated
HG00867	0	HG00867.LILRA7.tsv	0	0	1	CDX	EAS	HG00867	0	0	2	FALSE	haploid	TRUE	unrelated
HG00879	0	HG00879.LILRA7.tsv	0	0	1	CDX	EAS	HG00879	0	0	2	FALSE	haploid	TRUE	unrelated
HG00881	0	HG00881.LILRA7.tsv	0	0	1	CDX	EAS	HG00881	0	0	1	FALSE	haploid	TRUE	unrelated
HG00956	0	HG00956.LILRA7.tsv	0	0	1	CDX	EAS	HG00956	0	0	2	FALSE	haploid	TRUE	unrelated
HG00978	0	HG00978.LILRA7.tsv	0	0	1	CDX	EAS	HG00978	0	0	2	FALSE	haploid	TRUE	unrelated
HG00982	0	HG00982.LILRA7.tsv	0	0	1	CDX	EAS	HG00982	0	0	1	FALSE	haploid	TRUE	unrelated
HG01028	0	HG01028.LILRA7.tsv	0	0	1	CDX	EAS	HG01028	0	0	1	FALSE	haploid	TRUE	unrelated
HG01029	0	HG01029.LILRA7.tsv	0	0	1	CDX	EAS	HG01029	0	0	2	FALSE	haploid	TRUE	unrelated
HG01031	0	HG01031.LILRA7.tsv	0	0	1	CDX	EAS	HG01031	0	0	1	FALSE	haploid	TRUE	unrelated
HG01046	234	HG01046.LILRA7.tsv	5.45959	1	0.999998	CDX	EAS	HG01046	0	0	2	FALSE	haploid	TRUE	unrelated
HG01047	0	HG01047.LILRA7.tsv	0	0	1	PUR	AMR	HG01047	0	0	1	FALSE	haploid	TRUE	unrelated
HG01048	0	HG01048.LILRA7.tsv	0	0	1	PUR	AMR	HG01048	0	0	1	FALSE	haploid	TRUE	unrelated
HG01049	0	HG01049.LILRA7.tsv	0	0	1	PUR	AMR	HG01049	0	0	2	FALSE	haploid	TRUE	unrelated
HG01051	0	HG01051.LILRA7.tsv	0	0	1	PUR	AMR	HG01051	0	0	1	FALSE	haploid	TRUE	unrelated
HG01052	0	HG01052.LILRA7.tsv	0	0	1	PUR	AMR	HG01052	0	0	2	FALSE	haploid	TRUE	unrelated
HG01054	0	HG01054.LILRA7.tsv	0	0	1	PUR	AMR	HG01054	0	0	1	FALSE	haploid	TRUE	unrelated
HG01055	0	HG01055.LILRA7.tsv	0	0	1	PUR	AMR	HG01055	0	0	2	FALSE	haploid	TRUE	unrelated
HG01058	0	HG01058.LILRA7.tsv	0	0	1	PUR	AMR	HG01058	0	0	2	FALSE	haploid	TRUE	unrelated
HG01060	0	HG01060.LILRA7.tsv	0	0	1	PUR	AMR	HG01060	0	0	1	FALSE	haploid	TRUE	unrelated
HG01061	0	HG01061.LILRA7.tsv	0	0	1	PUR	AMR	HG01061	0	0	2	FALSE	haploid	TRUE	unrelated
HG01063	0	HG01063.LILRA7.tsv	0	0	1	PUR	AMR	HG01063	0	0	1	FALSE	haploid	TRUE	unrelated
HG01064	0	HG01064.LILRA7.tsv	0	0	1	PUR	AMR	HG01064	0	0	2	FALSE	haploid	TRUE	unrelated
HG01066	0	HG01066.LILRA7.tsv	0	0	1	PUR	AMR	HG01066	0	0	1	FALSE	haploid	TRUE	unrelated
HG01067	0	HG01067.LILRA7.tsv	0	0	1	PUR	AMR	HG01067	0	0	2	FALSE	haploid	TRUE	unrelated
HG01069	0	HG01069.LILRA7.tsv	0	0	1	PUR	AMR	HG01069	0	0	1	FALSE	haploid	TRUE	unrelated
HG01070	0	HG01070.LILRA7.tsv	0	0	1	PUR	AMR	HG01070	0	0	2	FALSE	haploid	TRUE	unrelated
HG01072	0	HG01072.LILRA7.tsv	0	0	1	PUR	AMR	HG01072	0	0	1	FALSE	haploid	TRUE	unrelated
HG01073	0	HG01073.LILRA7.tsv	0	0	1	PUR	AMR	HG01073	0	0	2	FALSE	haploid	TRUE	unrelated
HG01075	0	HG01075.LILRA7.tsv	0	0	1	PUR	AMR	HG01075	0	0	1	FALSE	haploid	TRUE	unrelated
HG01077	0	HG01077.LILRA7.tsv	0	0	1	PUR	AMR	HG01077	0	0	2	FALSE	haploid	TRUE	unrelated
HG01079	0	HG01079.LILRA7.tsv	0	0	1	PUR	AMR	HG01079	0	0	1	FALSE	haploid	TRUE	unrelated
HG01080	0	HG01080.LILRA7.tsv	0	0	1	PUR	AMR	HG01080	0	0	2	FALSE	haploid	TRUE	unrelated
HG01082	0	HG01082.LILRA7.tsv	0	0	1	PUR	AMR	HG01082	0	0	1	FALSE	haploid	TRUE	unrelated
HG01083	0	HG01083.LILRA7.tsv	0	0	1	PUR	AMR	HG01083	0	0	2	FALSE	haploid	TRUE	unrelated
HG01085	0	HG01085.LILRA7.tsv	0	0	1	PUR	AMR	HG01085	0	0	1	FALSE	haploid	TRUE	unrelated
HG01086	0	HG01086.LILRA7.tsv	0	0	1	PUR	AMR	HG01086	0	0	2	FALSE	haploid	TRUE	unrelated
HG01088	0	HG01088.LILRA7.tsv	0	0	1	PUR	AMR	HG01088	0	0	1	FALSE	haploid	TRUE	unrelated
HG01089	0	HG01089.LILRA7.tsv	0	0	1	PUR	AMR	HG01089	0	0	2	FALSE	haploid	TRUE	unrelated
HG01092	0	HG01092.LILRA7.tsv	0	0	1	PUR	AMR	HG01092	0	0	2	FALSE	haploid	TRUE	unrelated
HG01094	0	HG01094.LILRA7.tsv	0	0	1	PUR	AMR	HG01094	0	0	1	FALSE	haploid	TRUE	unrelated
HG01095	0	HG01095.LILRA7.tsv	0	0	1	PUR	AMR	HG01095	0	0	2	FALSE	haploid	TRUE	unrelated
HG01097	0	HG01097.LILRA7.tsv	0	0	1	PUR	AMR	HG01097	0	0	1	FALSE	haploid	TRUE	unrelated
HG01098	0	HG01098.LILRA7.tsv	0	0	1	PUR	AMR	HG01098	0	0	2	FALSE	haploid	TRUE	unrelated
HG01101	0	HG01101.LILRA7.tsv	0	0	1	PUR	AMR	HG01101	0	0	1	FALSE	haploid	TRUE	unrelated
HG01102	0	HG01102.LILRA7.tsv	0	0	1	PUR	AMR	HG01102	0	0	2	FALSE	haploid	TRUE	unrelated
HG01104	0	HG01104.LILRA7.tsv	0	0	1	PUR	AMR	HG01104	0	0	1	FALSE	haploid	TRUE	unrelated
HG01105	0	HG01105.LILRA7.tsv	0	0	1	PUR	AMR	HG01105	0	0	2	FALSE	haploid	TRUE	unrelated
HG01107	0	HG01107.LILRA7.tsv	0	0	1	PUR	AMR	HG01107	0	0	1	FALSE	haploid	TRUE	unrelated
HG01108	0	HG01108.LILRA7.tsv	0	0	1	PUR	AMR	HG01108	0	0	2	FALSE	haploid	TRUE	unrelated
HG01110	0	HG01110.LILRA7.tsv	0	0	1	PUR	AMR	HG01110	0	0	1	FALSE	haploid	TRUE	unrelated
HG01111	0	HG01111.LILRA7.tsv	0	0	1	PUR	AMR	HG01111	0	0	2	FALSE	haploid	TRUE	unrelated
HG01112	0	HG01112.LILRA7.tsv	0	0	1	CLM	AMR	HG01112	0	0	1	FALSE	haploid	TRUE	unrelated
HG01113	0	HG01113.LILRA7.tsv	0	0	1	CLM	AMR	HG01113	0	0	2	FALSE	haploid	TRUE	unrelated
HG01119	0	HG01119.LILRA7.tsv	0	0	1	CLM	AMR	HG01119	0	0	2	FALSE	haploid	TRUE	unrelated
HG01121	0	HG01121.LILRA7.tsv	0	0	1	CLM	AMR	HG01121	0	0	1	FALSE	haploid	TRUE	unrelated
HG01122	0	HG01122.LILRA7.tsv	0	0	1	CLM	AMR	HG01122	0	0	2	FALSE	haploid	TRUE	unrelated
HG01124	0	HG01124.LILRA7.tsv	0	0	1	CLM	AMR	HG01124	0	0	1	FALSE	haploid	TRUE	unrelated
HG01125	0	HG01125.LILRA7.tsv	0	0	1	CLM	AMR	HG01125	0	0	2	FALSE	haploid	TRUE	unrelated
HG01130	0	HG01130.LILRA7.tsv	0	0	1	CLM	AMR	HG01130	0	0	1	FALSE	haploid	TRUE	unrelated
HG01131	0	HG01131.LILRA7.tsv	0	0	1	CLM	AMR	HG01131	0	0	2	FALSE	haploid	TRUE	unrelated
HG01133	0	HG01133.LILRA7.tsv	0	0	1	CLM	AMR	HG01133	0	0	1	FALSE	haploid	TRUE	unrelated
HG01134	0	HG01134.LILRA7.tsv	0	0	1	CLM	AMR	HG01134	0	0	2	FALSE	haploid	TRUE	unrelated
HG01136	0	HG01136.LILRA7.tsv	0	0	1	CLM	AMR	HG01136	0	0	1	FALSE	haploid	TRUE	unrelated
HG01137	0	HG01137.LILRA7.tsv	0	0	1	CLM	AMR	HG01137	0	0	2	FALSE	haploid	TRUE	unrelated
HG01139	0	HG01139.LILRA7.tsv	0	0	1	CLM	AMR	HG01139	0	0	1	FALSE	haploid	TRUE	unrelated
HG01140	0	HG01140.LILRA7.tsv	0	0	1	CLM	AMR	HG01140	0	0	2	FALSE	haploid	TRUE	unrelated
HG01142	0	HG01142.LILRA7.tsv	0	0	1	CLM	AMR	HG01142	0	0	1	FALSE	haploid	TRUE	unrelated
HG01148	0	HG01148.LILRA7.tsv	0	0	1	CLM	AMR	HG01148	0	0	1	FALSE	haploid	TRUE	unrelated
HG01149	0	HG01149.LILRA7.tsv	0	0	1	CLM	AMR	HG01149	0	0	2	FALSE	haploid	TRUE	unrelated
HG01161	0	HG01161.LILRA7.tsv	0	0	1	PUR	AMR	HG01161	0	0	1	FALSE	haploid	TRUE	unrelated
HG01162	0	HG01162.LILRA7.tsv	0	0	1	PUR	AMR	HG01162	0	0	2	FALSE	haploid	TRUE	unrelated
HG01164	0	HG01164.LILRA7.tsv	0	0	1	PUR	AMR	HG01164	0	0	1	FALSE	haploid	TRUE	unrelated
HG01167	0	HG01167.LILRA7.tsv	0	0	1	PUR	AMR	HG01167	0	0	1	FALSE	haploid	TRUE	unrelated
HG01168	0	HG01168.LILRA7.tsv	0	0	1	PUR	AMR	HG01168	0	0	2	FALSE	haploid	TRUE	unrelated
HG01170	0	HG01170.LILRA7.tsv	0	0	1	PUR	AMR	HG01170	0	0	1	FALSE	haploid	TRUE	unrelated
HG01171	0	HG01171.LILRA7.tsv	0	0	1	PUR	AMR	HG01171	0	0	2	FALSE	haploid	TRUE	unrelated
HG01173	0	HG01173.LILRA7.tsv	0	0	1	PUR	AMR	HG01173	0	0	1	FALSE	haploid	TRUE	unrelated
HG01174	0	HG01174.LILRA7.tsv	0	0	1	PUR	AMR	HG01174	0	0	2	FALSE	haploid	TRUE	unrelated
HG01176	0	HG01176.LILRA7.tsv	0	0	1	PUR	AMR	HG01176	0	0	1	FALSE	haploid	TRUE	unrelated
HG01177	0	HG01177.LILRA7.tsv	0	0	1	PUR	AMR	HG01177	0	0	2	FALSE	haploid	TRUE	unrelated
HG01182	0	HG01182.LILRA7.tsv	0	0	1	PUR	AMR	HG01182	0	0	1	FALSE	haploid	TRUE	unrelated
HG01183	0	HG01183.LILRA7.tsv	0	0	1	PUR	AMR	HG01183	0	0	2	FALSE	haploid	TRUE	unrelated
HG01187	0	HG01187.LILRA7.tsv	0	0	1	PUR	AMR	HG01187	0	0	1	FALSE	haploid	TRUE	unrelated
HG01188	0	HG01188.LILRA7.tsv	0	0	1	PUR	AMR	HG01188	0	0	2	FALSE	haploid	TRUE	unrelated
HG01190	0	HG01190.LILRA7.tsv	0	0	1	PUR	AMR	HG01190	0	0	1	FALSE	haploid	TRUE	unrelated
HG01191	0	HG01191.LILRA7.tsv	0	0	1	PUR	AMR	HG01191	0	0	2	FALSE	haploid	TRUE	unrelated
HG01197	0	HG01197.LILRA7.tsv	0	0	1	PUR	AMR	HG01197	0	0	1	FALSE	haploid	TRUE	unrelated
HG01198	0	HG01198.LILRA7.tsv	0	0	1	PUR	AMR	HG01198	0	0	2	FALSE	haploid	TRUE	unrelated
HG01200	0	HG01200.LILRA7.tsv	0	0	1	PUR	AMR	HG01200	0	0	1	FALSE	haploid	TRUE	unrelated
HG01204	0	HG01204.LILRA7.tsv	0	0	1	PUR	AMR	HG01204	0	0	1	FALSE	haploid	TRUE	unrelated
HG01205	0	HG01205.LILRA7.tsv	0	0	1	PUR	AMR	HG01205	0	0	2	FALSE	haploid	TRUE	unrelated
HG01241	0	HG01241.LILRA7.tsv	0	0	1	PUR	AMR	HG01241	0	0	1	FALSE	haploid	TRUE	unrelated
HG01242	0	HG01242.LILRA7.tsv	0	0	1	PUR	AMR	HG01242	0	0	2	FALSE	haploid	TRUE	unrelated
HG01247	0	HG01247.LILRA7.tsv	0	0	1	PUR	AMR	HG01247	0	0	1	FALSE	haploid	TRUE	unrelated
HG01248	0	HG01248.LILRA7.tsv	0	0	1	PUR	AMR	HG01248	0	0	2	FALSE	haploid	TRUE	unrelated
HG01250	0	HG01250.LILRA7.tsv	0	0	1	CLM	AMR	HG01250	0	0	1	FALSE	haploid	TRUE	unrelated
HG01251	0	HG01251.LILRA7.tsv	0	0	1	CLM	AMR	HG01251	0	0	2	FALSE	haploid	TRUE	unrelated
HG01253	0	HG01253.LILRA7.tsv	0	0	1	CLM	AMR	HG01253	0	0	1	FALSE	haploid	TRUE	unrelated
HG01254	0	HG01254.LILRA7.tsv	0	0	1	CLM	AMR	HG01254	0	0	2	FALSE	haploid	TRUE	unrelated
HG01256	0	HG01256.LILRA7.tsv	0	0	1	CLM	AMR	HG01256	0	0	1	FALSE	haploid	TRUE	unrelated
HG01257	0	HG01257.LILRA7.tsv	0	0	1	CLM	AMR	HG01257	0	0	2	FALSE	haploid	TRUE	unrelated
HG01259	0	HG01259.LILRA7.tsv	0	0	1	CLM	AMR	HG01259	0	0	1	FALSE	haploid	TRUE	unrelated
HG01260	0	HG01260.LILRA7.tsv	0	0	1	CLM	AMR	HG01260	0	0	2	FALSE	haploid	TRUE	unrelated
HG01269	0	HG01269.LILRA7.tsv	0	0	1	CLM	AMR	HG01269	0	0	2	FALSE	haploid	TRUE	unrelated
HG01271	0	HG01271.LILRA7.tsv	0	0	1	CLM	AMR	HG01271	0	0	1	FALSE	haploid	TRUE	unrelated
HG01272	0	HG01272.LILRA7.tsv	0	0	1	CLM	AMR	HG01272	0	0	2	FALSE	haploid	TRUE	unrelated
HG01275	0	HG01275.LILRA7.tsv	0	0	1	CLM	AMR	HG01275	0	0	2	FALSE	haploid	TRUE	unrelated
HG01277	0	HG01277.LILRA7.tsv	0	0	1	CLM	AMR	HG01277	0	0	1	FALSE	haploid	TRUE	unrelated
HG01280	0	HG01280.LILRA7.tsv	0	0	1	CLM	AMR	HG01280	0	0	1	FALSE	haploid	TRUE	unrelated
HG01281	0	HG01281.LILRA7.tsv	0	0	1	CLM	AMR	HG01281	0	0	2	FALSE	haploid	TRUE	unrelated
HG01284	0	HG01284.LILRA7.tsv	0	0	1	CLM	AMR	HG01284	0	0	2	FALSE	haploid	TRUE	unrelated
HG01286	0	HG01286.LILRA7.tsv	0	0	1	PUR	AMR	HG01286	0	0	1	FALSE	haploid	TRUE	unrelated
HG01302	0	HG01302.LILRA7.tsv	0	0	1	PUR	AMR	HG01302	0	0	1	FALSE	haploid	TRUE	unrelated
HG01303	0	HG01303.LILRA7.tsv	0	0	1	PUR	AMR	HG01303	0	0	2	FALSE	haploid	TRUE	unrelated
HG01305	0	HG01305.LILRA7.tsv	0	0	1	PUR	AMR	HG01305	0	0	1	FALSE	haploid	TRUE	unrelated
HG01308	0	HG01308.LILRA7.tsv	0	0	1	PUR	AMR	HG01308	0	0	1	FALSE	haploid	TRUE	unrelated
HG01311	0	HG01311.LILRA7.tsv	0	0	1	PUR	AMR	HG01311	0	0	1	FALSE	haploid	TRUE	unrelated
HG01312	0	HG01312.LILRA7.tsv	0	0	1	PUR	AMR	HG01312	0	0	2	FALSE	haploid	TRUE	unrelated
HG01323	0	HG01323.LILRA7.tsv	0	0	1	PUR	AMR	HG01323	0	0	2	FALSE	haploid	TRUE	unrelated
HG01325	0	HG01325.LILRA7.tsv	0	0	1	PUR	AMR	HG01325	0	0	1	FALSE	haploid	TRUE	unrelated
HG01326	0	HG01326.LILRA7.tsv	0	0	1	PUR	AMR	HG01326	0	0	2	FALSE	haploid	TRUE	unrelated
HG01334	0	HG01334.LILRA7.tsv	0	0	1	GBR	EUR	HG01334	0	0	1	FALSE	haploid	TRUE	unrelated
HG01341	0	HG01341.LILRA7.tsv	0	0	1	CLM	AMR	HG01341	0	0	1	FALSE	haploid	TRUE	unrelated
HG01342	0	HG01342.LILRA7.tsv	0	0	1	CLM	AMR	HG01342	0	0	2	FALSE	haploid	TRUE	unrelated
HG01344	0	HG01344.LILRA7.tsv	0	0	1	CLM	AMR	HG01344	0	0	1	FALSE	haploid	TRUE	unrelated
HG01345	0	HG01345.LILRA7.tsv	0	0	1	CLM	AMR	HG01345	0	0	2	FALSE	haploid	TRUE	unrelated
HG01348	0	HG01348.LILRA7.tsv	0	0	1	CLM	AMR	HG01348	0	0	2	FALSE	haploid	TRUE	unrelated
HG01350	0	HG01350.LILRA7.tsv	0	0	1	CLM	AMR	HG01350	0	0	1	FALSE	haploid	TRUE	unrelated
HG01351	0	HG01351.LILRA7.tsv	0	0	1	CLM	AMR	HG01351	0	0	2	FALSE	haploid	TRUE	unrelated
HG01353	0	HG01353.LILRA7.tsv	0	0	1	CLM	AMR	HG01353	0	0	1	FALSE	haploid	TRUE	unrelated
HG01354	0	HG01354.LILRA7.tsv	0	0	1	CLM	AMR	HG01354	0	0	2	FALSE	haploid	TRUE	unrelated
HG01356	0	HG01356.LILRA7.tsv	0	0	1	CLM	AMR	HG01356	0	0	1	FALSE	haploid	TRUE	unrelated
HG01357	0	HG01357.LILRA7.tsv	0	0	1	CLM	AMR	HG01357	0	0	2	FALSE	haploid	TRUE	unrelated
HG01359	0	HG01359.LILRA7.tsv	0	0	1	CLM	AMR	HG01359	0	0	1	FALSE	haploid	TRUE	unrelated
HG01360	0	HG01360.LILRA7.tsv	0	0	1	CLM	AMR	HG01360	0	0	2	FALSE	haploid	TRUE	unrelated
HG01362	0	HG01362.LILRA7.tsv	0	0	1	CLM	AMR	HG01362	0	0	1	FALSE	haploid	TRUE	unrelated
HG01363	0	HG01363.LILRA7.tsv	0	0	1	CLM	AMR	HG01363	0	0	2	FALSE	haploid	TRUE	unrelated
HG01365	0	HG01365.LILRA7.tsv	0	0	1	CLM	AMR	HG01365	0	0	1	FALSE	haploid	TRUE	unrelated
HG01366	0	HG01366.LILRA7.tsv	0	0	1	CLM	AMR	HG01366	0	0	2	FALSE	haploid	TRUE	unrelated
HG01369	0	HG01369.LILRA7.tsv	0	0	1	CLM	AMR	HG01369	0	0	2	FALSE	haploid	TRUE	unrelated
HG01372	0	HG01372.LILRA7.tsv	0	0	1	CLM	AMR	HG01372	0	0	2	FALSE	haploid	TRUE	unrelated
HG01374	0	HG01374.LILRA7.tsv	0	0	1	CLM	AMR	HG01374	0	0	1	FALSE	haploid	TRUE	unrelated
HG01375	0	HG01375.LILRA7.tsv	0	0	1	CLM	AMR	HG01375	0	0	2	FALSE	haploid	TRUE	unrelated
HG01377	0	HG01377.LILRA7.tsv	0	0	1	CLM	AMR	HG01377	0	0	1	FALSE	haploid	TRUE	unrelated
HG01378	0	HG01378.LILRA7.tsv	0	0	1	CLM	AMR	HG01378	0	0	2	FALSE	haploid	TRUE	unrelated
HG01383	0	HG01383.LILRA7.tsv	0	0	1	CLM	AMR	HG01383	0	0	1	FALSE	haploid	TRUE	unrelated
HG01384	0	HG01384.LILRA7.tsv	0	0	1	CLM	AMR	HG01384	0	0	2	FALSE	haploid	TRUE	unrelated
HG01389	0	HG01389.LILRA7.tsv	0	0	1	CLM	AMR	HG01389	0	0	1	FALSE	haploid	TRUE	unrelated
HG01390	0	HG01390.LILRA7.tsv	0	0	1	CLM	AMR	HG01390	0	0	2	FALSE	haploid	TRUE	unrelated
HG01392	0	HG01392.LILRA7.tsv	0	0	1	PUR	AMR	HG01392	0	0	1	FALSE	haploid	TRUE	unrelated
HG01393	0	HG01393.LILRA7.tsv	0	0	1	PUR	AMR	HG01393	0	0	2	FALSE	haploid	TRUE	unrelated
HG01395	0	HG01395.LILRA7.tsv	0	0	1	PUR	AMR	HG01395	0	0	1	FALSE	haploid	TRUE	unrelated
HG01396	0	HG01396.LILRA7.tsv	0	0	1	PUR	AMR	HG01396	0	0	2	FALSE	haploid	TRUE	unrelated
HG01398	0	HG01398.LILRA7.tsv	0	0	1	PUR	AMR	HG01398	0	0	1	FALSE	haploid	TRUE	unrelated
HG01402	0	HG01402.LILRA7.tsv	0	0	1	PUR	AMR	HG01402	0	0	1	FALSE	haploid	TRUE	unrelated
HG01403	0	HG01403.LILRA7.tsv	0	0	1	PUR	AMR	HG01403	0	0	2	FALSE	haploid	TRUE	unrelated
HG01405	0	HG01405.LILRA7.tsv	0	0	1	PUR	AMR	HG01405	0	0	1	FALSE	haploid	TRUE	unrelated
HG01412	0	HG01412.LILRA7.tsv	0	0	1	PUR	AMR	HG01412	0	0	1	FALSE	haploid	TRUE	unrelated
HG01413	0	HG01413.LILRA7.tsv	0	0	1	PUR	AMR	HG01413	0	0	1	FALSE	haploid	TRUE	unrelated
HG01414	0	HG01414.LILRA7.tsv	0	0	1	PUR	AMR	HG01414	0	0	2	FALSE	haploid	TRUE	unrelated
HG01431	0	HG01431.LILRA7.tsv	0	0	1	CLM	AMR	HG01431	0	0	1	FALSE	haploid	TRUE	unrelated
HG01432	0	HG01432.LILRA7.tsv	0	0	1	CLM	AMR	HG01432	0	0	2	FALSE	haploid	TRUE	unrelated
HG01435	0	HG01435.LILRA7.tsv	0	0	1	CLM	AMR	HG01435	0	0	2	FALSE	haploid	TRUE	unrelated
HG01437	0	HG01437.LILRA7.tsv	0	0	1	CLM	AMR	HG01437	0	0	1	FALSE	haploid	TRUE	unrelated
HG01438	0	HG01438.LILRA7.tsv	0	0	1	CLM	AMR	HG01438	0	0	2	FALSE	haploid	TRUE	unrelated
HG01440	0	HG01440.LILRA7.tsv	0	0	1	CLM	AMR	HG01440	0	0	1	FALSE	haploid	TRUE	unrelated
HG01441	0	HG01441.LILRA7.tsv	0	0	1	CLM	AMR	HG01441	0	0	2	FALSE	haploid	TRUE	unrelated
HG01443	0	HG01443.LILRA7.tsv	0	0	1	CLM	AMR	HG01443	0	0	1	FALSE	haploid	TRUE	unrelated
HG01444	0	HG01444.LILRA7.tsv	0	0	1	CLM	AMR	HG01444	0	0	2	FALSE	haploid	TRUE	unrelated
HG01447	0	HG01447.LILRA7.tsv	0	0	1	CLM	AMR	HG01447	0	0	2	FALSE	haploid	TRUE	unrelated
HG01455	0	HG01455.LILRA7.tsv	0	0	1	CLM	AMR	HG01455	0	0	1	FALSE	haploid	TRUE	unrelated
HG01456	0	HG01456.LILRA7.tsv	0	0	1	CLM	AMR	HG01456	0	0	2	FALSE	haploid	TRUE	unrelated
HG01459	0	HG01459.LILRA7.tsv	0	0	1	CLM	AMR	HG01459	0	0	2	FALSE	haploid	TRUE	unrelated
HG01461	0	HG01461.LILRA7.tsv	0	0	1	CLM	AMR	HG01461	0	0	1	FALSE	haploid	TRUE	unrelated
HG01462	0	HG01462.LILRA7.tsv	0	0	1	CLM	AMR	HG01462	0	0	2	FALSE	haploid	TRUE	unrelated
HG01464	0	HG01464.LILRA7.tsv	0	0	1	CLM	AMR	HG01464	0	0	1	FALSE	haploid	TRUE	unrelated
HG01465	0	HG01465.LILRA7.tsv	0	0	1	CLM	AMR	HG01465	0	0	2	FALSE	haploid	TRUE	unrelated
HG01468	0	HG01468.LILRA7.tsv	0	0	1	CLM	AMR	HG01468	0	0	2	FALSE	haploid	TRUE	unrelated
HG01474	0	HG01474.LILRA7.tsv	0	0	1	CLM	AMR	HG01474	0	0	2	FALSE	haploid	TRUE	unrelated
HG01479	0	HG01479.LILRA7.tsv	0	0	1	CLM	AMR	HG01479	0	0	1	FALSE	haploid	TRUE	unrelated
HG01485	0	HG01485.LILRA7.tsv	0	0	1	CLM	AMR	HG01485	0	0	1	FALSE	haploid	TRUE	unrelated
HG01486	0	HG01486.LILRA7.tsv	0	0	1	CLM	AMR	HG01486	0	0	2	FALSE	haploid	TRUE	unrelated
HG01488	0	HG01488.LILRA7.tsv	0	0	1	CLM	AMR	HG01488	0	0	1	FALSE	haploid	TRUE	unrelated
HG01489	0	HG01489.LILRA7.tsv	0	0	1	CLM	AMR	HG01489	0	0	2	FALSE	haploid	TRUE	unrelated
HG01491	0	HG01491.LILRA7.tsv	0	0	1	CLM	AMR	HG01491	0	0	1	FALSE	haploid	TRUE	unrelated
HG01492	0	HG01492.LILRA7.tsv	0	0	1	CLM	AMR	HG01492	0	0	2	FALSE	haploid	TRUE	unrelated
HG01494	0	HG01494.LILRA7.tsv	0	0	1	CLM	AMR	HG01494	0	0	1	FALSE	haploid	TRUE	unrelated
HG01495	0	HG01495.LILRA7.tsv	0	0	1	CLM	AMR	HG01495	0	0	2	FALSE	haploid	TRUE	unrelated
HG01497	0	HG01497.LILRA7.tsv	0	0	1	CLM	AMR	HG01497	0	0	1	FALSE	haploid	TRUE	unrelated
HG01498	0	HG01498.LILRA7.tsv	0	0	1	CLM	AMR	HG01498	0	0	2	FALSE	haploid	TRUE	unrelated
HG01500	0	HG01500.LILRA7.tsv	0	0	1	IBS	EUR	HG01500	0	0	1	FALSE	haploid	TRUE	unrelated
HG01501	0	HG01501.LILRA7.tsv	0	0	1	IBS	EUR	HG01501	0	0	2	FALSE	haploid	TRUE	unrelated
HG01503	0	HG01503.LILRA7.tsv	0	0	1	IBS	EUR	HG01503	0	0	1	FALSE	haploid	TRUE	unrelated
HG01504	0	HG01504.LILRA7.tsv	0	0	1	IBS	EUR	HG01504	0	0	2	FALSE	haploid	TRUE	unrelated
HG01506	0	HG01506.LILRA7.tsv	0	0	1	IBS	EUR	HG01506	0	0	1	FALSE	haploid	TRUE	unrelated
HG01507	0	HG01507.LILRA7.tsv	0	0	1	IBS	EUR	HG01507	0	0	2	FALSE	haploid	TRUE	unrelated
HG01509	0	HG01509.LILRA7.tsv	0	0	1	IBS	EUR	HG01509	0	0	1	FALSE	haploid	TRUE	unrelated
HG01510	0	HG01510.LILRA7.tsv	0	0	1	IBS	EUR	HG01510	0	0	2	FALSE	haploid	TRUE	unrelated
HG01512	0	HG01512.LILRA7.tsv	0	0	1	IBS	EUR	HG01512	0	0	1	FALSE	haploid	TRUE	unrelated
HG01513	0	HG01513.LILRA7.tsv	0	0	1	IBS	EUR	HG01513	0	0	2	FALSE	haploid	TRUE	unrelated
HG01515	0	HG01515.LILRA7.tsv	0	0	1	IBS	EUR	HG01515	0	0	1	FALSE	haploid	TRUE	unrelated
HG01516	0	HG01516.LILRA7.tsv	0	0	1	IBS	EUR	HG01516	0	0	2	FALSE	haploid	TRUE	unrelated
HG01518	0	HG01518.LILRA7.tsv	0	0	1	IBS	EUR	HG01518	0	0	1	FALSE	haploid	TRUE	unrelated
HG01519	0	HG01519.LILRA7.tsv	0	0	1	IBS	EUR	HG01519	0	0	2	FALSE	haploid	TRUE	unrelated
HG01521	0	HG01521.LILRA7.tsv	0	0	1	IBS	EUR	HG01521	0	0	1	FALSE	haploid	TRUE	unrelated
HG01522	0	HG01522.LILRA7.tsv	0	0	1	IBS	EUR	HG01522	0	0	2	FALSE	haploid	TRUE	unrelated
HG01524	0	HG01524.LILRA7.tsv	0	0	1	IBS	EUR	HG01524	0	0	1	FALSE	haploid	TRUE	unrelated
HG01525	0	HG01525.LILRA7.tsv	0	0	1	IBS	EUR	HG01525	0	0	2	FALSE	haploid	TRUE	unrelated
HG01527	0	HG01527.LILRA7.tsv	0	0	1	IBS	EUR	HG01527	0	0	1	FALSE	haploid	TRUE	unrelated
HG01528	0	HG01528.LILRA7.tsv	0	0	1	IBS	EUR	HG01528	0	0	2	FALSE	haploid	TRUE	unrelated
HG01530	0	HG01530.LILRA7.tsv	0	0	1	IBS	EUR	HG01530	0	0	1	FALSE	haploid	TRUE	unrelated
HG01531	0	HG01531.LILRA7.tsv	0	0	1	IBS	EUR	HG01531	0	0	2	FALSE	haploid	TRUE	unrelated
HG01536	0	HG01536.LILRA7.tsv	0	0	1	IBS	EUR	HG01536	0	0	1	FALSE	haploid	TRUE	unrelated
HG01537	0	HG01537.LILRA7.tsv	0	0	1	IBS	EUR	HG01537	0	0	2	FALSE	haploid	TRUE	unrelated
HG01550	0	HG01550.LILRA7.tsv	0	0	1	CLM	AMR	HG01550	0	0	1	FALSE	haploid	TRUE	unrelated
HG01551	0	HG01551.LILRA7.tsv	0	0	1	CLM	AMR	HG01551	0	0	2	FALSE	haploid	TRUE	unrelated
HG01556	0	HG01556.LILRA7.tsv	0	0	1	CLM	AMR	HG01556	0	0	1	FALSE	haploid	TRUE	unrelated
HG01565	0	HG01565.LILRA7.tsv	0	0	1	PEL	AMR	HG01565	0	0	1	FALSE	haploid	TRUE	unrelated
HG01566	0	HG01566.LILRA7.tsv	0	0	1	PEL	AMR	HG01566	0	0	2	FALSE	haploid	TRUE	unrelated
HG01571	0	HG01571.LILRA7.tsv	0	0	1	PEL	AMR	HG01571	0	0	1	FALSE	haploid	TRUE	unrelated
HG01572	0	HG01572.LILRA7.tsv	0	0	1	PEL	AMR	HG01572	0	0	2	FALSE	haploid	TRUE	unrelated
HG01577	0	HG01577.LILRA7.tsv	0	0	1	PEL	AMR	HG01577	0	0	1	FALSE	haploid	TRUE	unrelated
HG01578	0	HG01578.LILRA7.tsv	0	0	1	PEL	AMR	HG01578	0	0	2	FALSE	haploid	TRUE	unrelated
HG01583	0	HG01583.LILRA7.tsv	0	0	1	PJL	SAS	HG01583	0	0	1	FALSE	haploid	TRUE	unrelated
HG01586	0	HG01586.LILRA7.tsv	0	0	1	PJL	SAS	HG01586	0	0	1	FALSE	haploid	TRUE	unrelated
HG01589	0	HG01589.LILRA7.tsv	0	0	1	PJL	SAS	HG01589	0	0	1	FALSE	haploid	TRUE	unrelated
HG01593	0	HG01593.LILRA7.tsv	0	0	1	PJL	SAS	HG01593	0	0	2	FALSE	haploid	TRUE	unrelated
HG01595	0	HG01595.LILRA7.tsv	0	0	1	KHV	EAS	HG01595	0	0	2	FALSE	haploid	TRUE	unrelated
HG01596	0	HG01596.LILRA7.tsv	0	0	1	KHV	EAS	HG01596	0	0	1	FALSE	haploid	TRUE	unrelated
HG01597	0	HG01597.LILRA7.tsv	0	0	1	KHV	EAS	HG01597	0	0	2	FALSE	haploid	TRUE	unrelated
HG01598	0	HG01598.LILRA7.tsv	0	0	1	KHV	EAS	HG01598	0	0	2	FALSE	haploid	TRUE	unrelated
HG01599	0	HG01599.LILRA7.tsv	0	0	1	KHV	EAS	HG01599	0	0	2	FALSE	haploid	TRUE	unrelated
HG01600	0	HG01600.LILRA7.tsv	0	0	1	KHV	EAS	HG01600	0	0	2	FALSE	haploid	TRUE	unrelated
HG01602	0	HG01602.LILRA7.tsv	0	0	1	IBS	EUR	HG01602	0	0	2	FALSE	haploid	TRUE	unrelated
HG01603	0	HG01603.LILRA7.tsv	0	0	1	IBS	EUR	HG01603	0	0	1	FALSE	haploid	TRUE	unrelated
HG01605	0	HG01605.LILRA7.tsv	0	0	1	IBS	EUR	HG01605	0	0	2	FALSE	haploid	TRUE	unrelated
HG01606	0	HG01606.LILRA7.tsv	0	0	1	IBS	EUR	HG01606	0	0	1	FALSE	haploid	TRUE	unrelated
HG01607	0	HG01607.LILRA7.tsv	0	0	1	IBS	EUR	HG01607	0	0	2	FALSE	haploid	TRUE	unrelated
HG01608	0	HG01608.LILRA7.tsv	0	0	1	IBS	EUR	HG01608	0	0	1	FALSE	haploid	TRUE	unrelated
HG01610	0	HG01610.LILRA7.tsv	0	0	1	IBS	EUR	HG01610	0	0	1	FALSE	haploid	TRUE	unrelated
HG01612	0	HG01612.LILRA7.tsv	0	0	1	IBS	EUR	HG01612	0	0	2	FALSE	haploid	TRUE	unrelated
HG01613	0	HG01613.LILRA7.tsv	0	0	1	IBS	EUR	HG01613	0	0	2	FALSE	haploid	TRUE	unrelated
HG01615	0	HG01615.LILRA7.tsv	0	0	1	IBS	EUR	HG01615	0	0	1	FALSE	haploid	TRUE	unrelated
HG01617	0	HG01617.LILRA7.tsv	0	0	1	IBS	EUR	HG01617	0	0	1	FALSE	haploid	TRUE	unrelated
HG01618	0	HG01618.LILRA7.tsv	0	0	1	IBS	EUR	HG01618	0	0	2	FALSE	haploid	TRUE	unrelated
HG01619	0	HG01619.LILRA7.tsv	0	0	1	IBS	EUR	HG01619	0	0	1	FALSE	haploid	TRUE	unrelated
HG01620	0	HG01620.LILRA7.tsv	0	0	1	IBS	EUR	HG01620	0	0	2	FALSE	haploid	TRUE	unrelated
HG01623	0	HG01623.LILRA7.tsv	0	0	1	IBS	EUR	HG01623	0	0	2	FALSE	haploid	TRUE	unrelated
HG01624	0	HG01624.LILRA7.tsv	0	0	1	IBS	EUR	HG01624	0	0	1	FALSE	haploid	TRUE	unrelated
HG01625	0	HG01625.LILRA7.tsv	0	0	1	IBS	EUR	HG01625	0	0	1	FALSE	haploid	TRUE	unrelated
HG01626	0	HG01626.LILRA7.tsv	0	0	1	IBS	EUR	HG01626	0	0	2	FALSE	haploid	TRUE	unrelated
HG01628	0	HG01628.LILRA7.tsv	0	0	1	IBS	EUR	HG01628	0	0	2	FALSE	haploid	TRUE	unrelated
HG01630	0	HG01630.LILRA7.tsv	0	0	1	IBS	EUR	HG01630	0	0	1	FALSE	haploid	TRUE	unrelated
HG01631	0	HG01631.LILRA7.tsv	0	0	1	IBS	EUR	HG01631	0	0	1	FALSE	haploid	TRUE	unrelated
HG01632	0	HG01632.LILRA7.tsv	0	0	1	IBS	EUR	HG01632	0	0	2	FALSE	haploid	TRUE	unrelated
HG01668	0	HG01668.LILRA7.tsv	0	0	1	IBS	EUR	HG01668	0	0	2	FALSE	haploid	TRUE	unrelated
HG01669	0	HG01669.LILRA7.tsv	0	0	1	IBS	EUR	HG01669	0	0	1	FALSE	haploid	TRUE	unrelated
HG01670	0	HG01670.LILRA7.tsv	0	0	1	IBS	EUR	HG01670	0	0	2	FALSE	haploid	TRUE	unrelated
HG01672	0	HG01672.LILRA7.tsv	0	0	1	IBS	EUR	HG01672	0	0	1	FALSE	haploid	TRUE	unrelated
HG01673	0	HG01673.LILRA7.tsv	0	0	1	IBS	EUR	HG01673	0	0	2	FALSE	haploid	TRUE	unrelated
HG01675	0	HG01675.LILRA7.tsv	0	0	1	IBS	EUR	HG01675	0	0	1	FALSE	haploid	TRUE	unrelated
HG01676	0	HG01676.LILRA7.tsv	0	0	1	IBS	EUR	HG01676	0	0	2	FALSE	haploid	TRUE	unrelated
HG01678	1	HG01678.LILRA7.tsv	0.693147	0	0.999999	IBS	EUR	HG01678	0	0	1	FALSE	haploid	TRUE	unrelated
HG01679	0	HG01679.LILRA7.tsv	0	0	1	IBS	EUR	HG01679	0	0	2	FALSE	haploid	TRUE	unrelated
HG01680	0	HG01680.LILRA7.tsv	0	0	1	IBS	EUR	HG01680	0	0	1	FALSE	haploid	TRUE	unrelated
HG01682	0	HG01682.LILRA7.tsv	0	0	1	IBS	EUR	HG01682	0	0	1	FALSE	haploid	TRUE	unrelated
HG01684	0	HG01684.LILRA7.tsv	0	0	1	IBS	EUR	HG01684	0	0	2	FALSE	haploid	TRUE	unrelated
HG01685	0	HG01685.LILRA7.tsv	0	0	1	IBS	EUR	HG01685	0	0	2	FALSE	haploid	TRUE	unrelated
HG01686	0	HG01686.LILRA7.tsv	0	0	1	IBS	EUR	HG01686	0	0	1	FALSE	haploid	TRUE	unrelated
HG01694	0	HG01694.LILRA7.tsv	0	0	1	IBS	EUR	HG01694	0	0	1	FALSE	haploid	TRUE	unrelated
HG01695	0	HG01695.LILRA7.tsv	0	0	1	IBS	EUR	HG01695	0	0	2	FALSE	haploid	TRUE	unrelated
HG01697	0	HG01697.LILRA7.tsv	0	0	1	IBS	EUR	HG01697	0	0	2	FALSE	haploid	TRUE	unrelated
HG01699	0	HG01699.LILRA7.tsv	0	0	1	IBS	EUR	HG01699	0	0	1	FALSE	haploid	TRUE	unrelated
HG01700	0	HG01700.LILRA7.tsv	0	0	1	IBS	EUR	HG01700	0	0	1	FALSE	haploid	TRUE	unrelated
HG01702	0	HG01702.LILRA7.tsv	0	0	1	IBS	EUR	HG01702	0	0	2	FALSE	haploid	TRUE	unrelated
HG01704	0	HG01704.LILRA7.tsv	0	0	1	IBS	EUR	HG01704	0	0	2	FALSE	haploid	TRUE	unrelated
HG01705	0	HG01705.LILRA7.tsv	0	0	1	IBS	EUR	HG01705	0	0	1	FALSE	haploid	TRUE	unrelated
HG01707	0	HG01707.LILRA7.tsv	0	0	1	IBS	EUR	HG01707	0	0	2	FALSE	haploid	TRUE	unrelated
HG01708	0	HG01708.LILRA7.tsv	0	0	1	IBS	EUR	HG01708	0	0	1	FALSE	haploid	TRUE	unrelated
HG01709	0	HG01709.LILRA7.tsv	0	0	1	IBS	EUR	HG01709	0	0	1	FALSE	haploid	TRUE	unrelated
HG01710	0	HG01710.LILRA7.tsv	0	0	1	IBS	EUR	HG01710	0	0	2	FALSE	haploid	TRUE	unrelated
HG01746	0	HG01746.LILRA7.tsv	0	0	1	IBS	EUR	HG01746	0	0	2	FALSE	haploid	TRUE	unrelated
HG01747	0	HG01747.LILRA7.tsv	0	0	1	IBS	EUR	HG01747	0	0	1	FALSE	haploid	TRUE	unrelated
HG01756	0	HG01756.LILRA7.tsv	0	0	1	IBS	EUR	HG01756	0	0	1	FALSE	haploid	TRUE	unrelated
HG01757	0	HG01757.LILRA7.tsv	0	0	1	IBS	EUR	HG01757	0	0	2	FALSE	haploid	TRUE	unrelated
HG01761	0	HG01761.LILRA7.tsv	0	0	1	IBS	EUR	HG01761	0	0	1	FALSE	haploid	TRUE	unrelated
HG01762	0	HG01762.LILRA7.tsv	0	0	1	IBS	EUR	HG01762	0	0	2	FALSE	haploid	TRUE	unrelated
HG01765	0	HG01765.LILRA7.tsv	0	0	1	IBS	EUR	HG01765	0	0	1	FALSE	haploid	TRUE	unrelated
HG01766	0	HG01766.LILRA7.tsv	0	0	1	IBS	EUR	HG01766	0	0	2	FALSE	haploid	TRUE	unrelated
HG01767	0	HG01767.LILRA7.tsv	0	0	1	IBS	EUR	HG01767	0	0	1	FALSE	haploid	TRUE	unrelated
HG01768	0	HG01768.LILRA7.tsv	0	0	1	IBS	EUR	HG01768	0	0	2	FALSE	haploid	TRUE	unrelated
HG01770	0	HG01770.LILRA7.tsv	0	0	1	IBS	EUR	HG01770	0	0	2	FALSE	haploid	TRUE	unrelated
HG01771	0	HG01771.LILRA7.tsv	0	0	1	IBS	EUR	HG01771	0	0	1	FALSE	haploid	TRUE	unrelated
HG01773	0	HG01773.LILRA7.tsv	0	0	1	IBS	EUR	HG01773	0	0	2	FALSE	haploid	TRUE	unrelated
HG01775	0	HG01775.LILRA7.tsv	0	0	1	IBS	EUR	HG01775	0	0	1	FALSE	haploid	TRUE	unrelated
HG01776	0	HG01776.LILRA7.tsv	0	0	1	IBS	EUR	HG01776	0	0	2	FALSE	haploid	TRUE	unrelated
HG01777	0	HG01777.LILRA7.tsv	0	0	1	IBS	EUR	HG01777	0	0	1	FALSE	haploid	TRUE	unrelated
HG01779	0	HG01779.LILRA7.tsv	0	0	1	IBS	EUR	HG01779	0	0	2	FALSE	haploid	TRUE	unrelated
HG01781	0	HG01781.LILRA7.tsv	0	0	1	IBS	EUR	HG01781	0	0	1	FALSE	haploid	TRUE	unrelated
HG01783	0	HG01783.LILRA7.tsv	0	0	1	IBS	EUR	HG01783	0	0	1	FALSE	haploid	TRUE	unrelated
HG01784	0	HG01784.LILRA7.tsv	0	0	1	IBS	EUR	HG01784	0	0	2	FALSE	haploid	TRUE	unrelated
HG01785	0	HG01785.LILRA7.tsv	0	0	1	IBS	EUR	HG01785	0	0	1	FALSE	haploid	TRUE	unrelated
HG01786	0	HG01786.LILRA7.tsv	0	0	1	IBS	EUR	HG01786	0	0	2	FALSE	haploid	TRUE	unrelated
HG01789	0	HG01789.LILRA7.tsv	0	0	1	GBR	EUR	HG01789	0	0	1	FALSE	haploid	TRUE	unrelated
HG01790	0	HG01790.LILRA7.tsv	0	0	1	GBR	EUR	HG01790	0	0	2	FALSE	haploid	TRUE	unrelated
HG01791	0	HG01791.LILRA7.tsv	0	0	1	GBR	EUR	HG01791	0	0	1	FALSE	haploid	TRUE	unrelated
HG01794	0	HG01794.LILRA7.tsv	0	0	1	CDX	EAS	HG01794	0	0	2	FALSE	haploid	TRUE	unrelated
HG01795	0	HG01795.LILRA7.tsv	0	0	1	CDX	EAS	HG01795	0	0	2	FALSE	haploid	TRUE	unrelated
HG01796	0	HG01796.LILRA7.tsv	0	0	1	CDX	EAS	HG01796	0	0	2	FALSE	haploid	TRUE	unrelated
HG01797	0	HG01797.LILRA7.tsv	0	0	1	CDX	EAS	HG01797	0	0	2	FALSE	haploid	TRUE	unrelated
HG01798	0	HG01798.LILRA7.tsv	0	0	1	CDX	EAS	HG01798	0	0	2	FALSE	haploid	TRUE	unrelated
HG01799	0	HG01799.LILRA7.tsv	0	0	1	CDX	EAS	HG01799	0	0	2	FALSE	haploid	TRUE	unrelated
HG01800	0	HG01800.LILRA7.tsv	0	0	1	CDX	EAS	HG01800	0	0	2	FALSE	haploid	TRUE	unrelated
HG01801	0	HG01801.LILRA7.tsv	0	0	1	CDX	EAS	HG01801	0	0	2	FALSE	haploid	TRUE	unrelated
HG01802	0	HG01802.LILRA7.tsv	0	0	1	CDX	EAS	HG01802	0	0	2	FALSE	haploid	TRUE	unrelated
HG01804	0	HG01804.LILRA7.tsv	0	0	1	CDX	EAS	HG01804	0	0	2	FALSE	haploid	TRUE	unrelated
HG01805	0	HG01805.LILRA7.tsv	0	0	1	CDX	EAS	HG01805	0	0	2	FALSE	haploid	TRUE	unrelated
HG01806	0	HG01806.LILRA7.tsv	0	0	1	CDX	EAS	HG01806	0	0	2	FALSE	haploid	TRUE	unrelated
HG01807	0	HG01807.LILRA7.tsv	0	0	1	CDX	EAS	HG01807	0	0	2	FALSE	haploid	TRUE	unrelated
HG01808	0	HG01808.LILRA7.tsv	0	0	1	CDX	EAS	HG01808	0	0	2	FALSE	haploid	TRUE	unrelated
HG01809	0	HG01809.LILRA7.tsv	0	0	1	CDX	EAS	HG01809	0	0	2	FALSE	haploid	TRUE	unrelated
HG01810	0	HG01810.LILRA7.tsv	0	0	1	CDX	EAS	HG01810	0	0	1	FALSE	haploid	TRUE	unrelated
HG01811	0	HG01811.LILRA7.tsv	0	0	1	CDX	EAS	HG01811	0	0	1	FALSE	haploid	TRUE	unrelated
HG01812	0	HG01812.LILRA7.tsv	0	0	1	CDX	EAS	HG01812	0	0	2	FALSE	haploid	TRUE	unrelated
HG01813	0	HG01813.LILRA7.tsv	0	0	1	CDX	EAS	HG01813	0	0	2	FALSE	haploid	TRUE	unrelated
HG01815	0	HG01815.LILRA7.tsv	0	0	1	CDX	EAS	HG01815	0	0	2	FALSE	haploid	TRUE	unrelated
HG01816	0	HG01816.LILRA7.tsv	0	0	1	CDX	EAS	HG01816	0	0	1	FALSE	haploid	TRUE	unrelated
HG01817	0	HG01817.LILRA7.tsv	0	0	1	CDX	EAS	HG01817	0	0	2	FALSE	haploid	TRUE	unrelated
HG01840	0	HG01840.LILRA7.tsv	0	0	1	KHV	EAS	HG01840	0	0	1	FALSE	haploid	TRUE	unrelated
HG01841	0	HG01841.LILRA7.tsv	0	0	1	KHV	EAS	HG01841	0	0	2	FALSE	haploid	TRUE	unrelated
HG01842	0	HG01842.LILRA7.tsv	0	0	1	KHV	EAS	HG01842	0	0	1	FALSE	haploid	TRUE	unrelated
HG01843	0	HG01843.LILRA7.tsv	0	0	1	KHV	EAS	HG01843	0	0	2	FALSE	haploid	TRUE	unrelated
HG01844	0	HG01844.LILRA7.tsv	0	0	1	KHV	EAS	HG01844	0	0	1	FALSE	haploid	TRUE	unrelated
HG01845	0	HG01845.LILRA7.tsv	0	0	1	KHV	EAS	HG01845	0	0	2	FALSE	haploid	TRUE	unrelated
HG01846	0	HG01846.LILRA7.tsv	0	0	1	KHV	EAS	HG01846	0	0	1	FALSE	haploid	TRUE	unrelated
HG01847	0	HG01847.LILRA7.tsv	0	0	1	KHV	EAS	HG01847	0	0	2	FALSE	haploid	TRUE	unrelated
HG01848	0	HG01848.LILRA7.tsv	0	0	1	KHV	EAS	HG01848	0	0	2	FALSE	haploid	TRUE	unrelated
HG01849	0	HG01849.LILRA7.tsv	0	0	1	KHV	EAS	HG01849	0	0	1	FALSE	haploid	TRUE	unrelated
HG01850	0	HG01850.LILRA7.tsv	0	0	1	KHV	EAS	HG01850	0	0	2	FALSE	haploid	TRUE	unrelated
HG01851	0	HG01851.LILRA7.tsv	0	0	1	KHV	EAS	HG01851	0	0	2	FALSE	haploid	TRUE	unrelated
HG01852	0	HG01852.LILRA7.tsv	0	0	1	KHV	EAS	HG01852	0	0	1	FALSE	haploid	TRUE	unrelated
HG01853	0	HG01853.LILRA7.tsv	0	0	1	KHV	EAS	HG01853	0	0	2	FALSE	haploid	TRUE	unrelated
HG01855	0	HG01855.LILRA7.tsv	0	0	1	KHV	EAS	HG01855	0	0	2	FALSE	haploid	TRUE	unrelated
HG01857	0	HG01857.LILRA7.tsv	0	0	1	KHV	EAS	HG01857	0	0	2	FALSE	haploid	TRUE	unrelated
HG01858	0	HG01858.LILRA7.tsv	0	0	1	KHV	EAS	HG01858	0	0	2	FALSE	haploid	TRUE	unrelated
HG01859	0	HG01859.LILRA7.tsv	0	0	1	KHV	EAS	HG01859	0	0	2	FALSE	haploid	TRUE	unrelated
HG01860	0	HG01860.LILRA7.tsv	0	0	1	KHV	EAS	HG01860	0	0	1	FALSE	haploid	TRUE	unrelated
HG01861	0	HG01861.LILRA7.tsv	0	0	1	KHV	EAS	HG01861	0	0	1	FALSE	haploid	TRUE	unrelated
HG01862	0	HG01862.LILRA7.tsv	0	0	1	KHV	EAS	HG01862	0	0	2	FALSE	haploid	TRUE	unrelated
HG01863	0	HG01863.LILRA7.tsv	0	0	1	KHV	EAS	HG01863	0	0	2	FALSE	haploid	TRUE	unrelated
HG01864	0	HG01864.LILRA7.tsv	0	0	1	KHV	EAS	HG01864	0	0	1	FALSE	haploid	TRUE	unrelated
HG01865	0	HG01865.LILRA7.tsv	0	0	1	KHV	EAS	HG01865	0	0	1	FALSE	haploid	TRUE	unrelated
HG01866	0	HG01866.LILRA7.tsv	0	0	1	KHV	EAS	HG01866	0	0	1	FALSE	haploid	TRUE	unrelated
HG01867	0	HG01867.LILRA7.tsv	0	0	1	KHV	EAS	HG01867	0	0	1	FALSE	haploid	TRUE	unrelated
HG01868	0	HG01868.LILRA7.tsv	0	0	1	KHV	EAS	HG01868	0	0	2	FALSE	haploid	TRUE	unrelated
HG01869	0	HG01869.LILRA7.tsv	0	0	1	KHV	EAS	HG01869	0	0	2	FALSE	haploid	TRUE	unrelated
HG01870	0	HG01870.LILRA7.tsv	0	0	1	KHV	EAS	HG01870	0	0	2	FALSE	haploid	TRUE	unrelated
HG01871	0	HG01871.LILRA7.tsv	0	0	1	KHV	EAS	HG01871	0	0	2	FALSE	haploid	TRUE	unrelated
HG01872	0	HG01872.LILRA7.tsv	0	0	1	KHV	EAS	HG01872	0	0	1	FALSE	haploid	TRUE	unrelated
HG01873	0	HG01873.LILRA7.tsv	0	0	1	KHV	EAS	HG01873	0	0	1	FALSE	haploid	TRUE	unrelated
HG01874	0	HG01874.LILRA7.tsv	0	0	1	KHV	EAS	HG01874	0	0	2	FALSE	haploid	TRUE	unrelated
HG01878	0	HG01878.LILRA7.tsv	0	0	1	KHV	EAS	HG01878	0	0	2	FALSE	haploid	TRUE	unrelated
HG01879	0	HG01879.LILRA7.tsv	0	0	1	ACB	AFR	HG01879	0	0	1	FALSE	haploid	TRUE	unrelated
HG01880	0	HG01880.LILRA7.tsv	0	0	1	ACB	AFR	HG01880	0	0	2	FALSE	haploid	TRUE	unrelated
HG01882	0	HG01882.LILRA7.tsv	0	0	1	ACB	AFR	HG01882	0	0	1	FALSE	haploid	TRUE	unrelated
HG01883	0	HG01883.LILRA7.tsv	0	0	1	ACB	AFR	HG01883	0	0	2	FALSE	haploid	TRUE	unrelated
HG01885	0	HG01885.LILRA7.tsv	0	0	1	ACB	AFR	HG01885	0	0	1	FALSE	haploid	TRUE	unrelated
HG01886	0	HG01886.LILRA7.tsv	0	0	1	ACB	AFR	HG01886	0	0	2	FALSE	haploid	TRUE	unrelated
HG01889	0	HG01889.LILRA7.tsv	0	0	1	ACB	AFR	HG01889	0	0	2	FALSE	haploid	TRUE	unrelated
HG01890	0	HG01890.LILRA7.tsv	0	0	1	ACB	AFR	HG01890	0	0	1	FALSE	haploid	TRUE	unrelated
HG01892	0	HG01892.LILRA7.tsv	0	0	1	PEL	AMR	HG01892	0	0	1	FALSE	haploid	TRUE	unrelated
HG01893	0	HG01893.LILRA7.tsv	0	0	1	PEL	AMR	HG01893	0	0	2	FALSE	haploid	TRUE	unrelated
HG01894	0	HG01894.LILRA7.tsv	0	0	1	ACB	AFR	HG01894	0	0	2	FALSE	haploid	TRUE	unrelated
HG01896	0	HG01896.LILRA7.tsv	0	0	1	ACB	AFR	HG01896	0	0	2	FALSE	haploid	TRUE	unrelated
HG01912	0	HG01912.LILRA7.tsv	0	0	1	ACB	AFR	HG01912	0	0	1	FALSE	haploid	TRUE	unrelated
HG01914	0	HG01914.LILRA7.tsv	0	0	1	ACB	AFR	HG01914	0	0	1	FALSE	haploid	TRUE	unrelated
HG01915	0	HG01915.LILRA7.tsv	0	0	1	ACB	AFR	HG01915	0	0	2	FALSE	haploid	TRUE	unrelated
HG01917	0	HG01917.LILRA7.tsv	0	0	1	PEL	AMR	HG01917	0	0	1	FALSE	haploid	TRUE	unrelated
HG01918	0	HG01918.LILRA7.tsv	0	0	1	PEL	AMR	HG01918	0	0	2	FALSE	haploid	TRUE	unrelated
HG01920	0	HG01920.LILRA7.tsv	0	0	1	PEL	AMR	HG01920	0	0	1	FALSE	haploid	TRUE	unrelated
HG01921	0	HG01921.LILRA7.tsv	0	0	1	PEL	AMR	HG01921	0	0	2	FALSE	haploid	TRUE	unrelated
HG01923	0	HG01923.LILRA7.tsv	0	0	1	PEL	AMR	HG01923	0	0	1	FALSE	haploid	TRUE	unrelated
HG01924	0	HG01924.LILRA7.tsv	0	0	1	PEL	AMR	HG01924	0	0	2	FALSE	haploid	TRUE	unrelated
HG01926	0	HG01926.LILRA7.tsv	0	0	1	PEL	AMR	HG01926	0	0	1	FALSE	haploid	TRUE	unrelated
HG01927	0	HG01927.LILRA7.tsv	0	0	1	PEL	AMR	HG01927	0	0	2	FALSE	haploid	TRUE	unrelated
HG01932	0	HG01932.LILRA7.tsv	0	0	1	PEL	AMR	HG01932	0	0	1	FALSE	haploid	TRUE	unrelated
HG01933	0	HG01933.LILRA7.tsv	0	0	1	PEL	AMR	HG01933	0	0	2	FALSE	haploid	TRUE	unrelated
HG01935	0	HG01935.LILRA7.tsv	0	0	1	PEL	AMR	HG01935	0	0	1	FALSE	haploid	TRUE	unrelated
HG01936	0	HG01936.LILRA7.tsv	0	0	1	PEL	AMR	HG01936	0	0	2	FALSE	haploid	TRUE	unrelated
HG01938	0	HG01938.LILRA7.tsv	0	0	1	PEL	AMR	HG01938	0	0	1	FALSE	haploid	TRUE	unrelated
HG01939	0	HG01939.LILRA7.tsv	0	0	1	PEL	AMR	HG01939	0	0	2	FALSE	haploid	TRUE	unrelated
HG01941	0	HG01941.LILRA7.tsv	0	0	1	PEL	AMR	HG01941	0	0	1	FALSE	haploid	TRUE	unrelated
HG01942	0	HG01942.LILRA7.tsv	0	0	1	PEL	AMR	HG01942	0	0	2	FALSE	haploid	TRUE	unrelated
HG01944	0	HG01944.LILRA7.tsv	0	0	1	PEL	AMR	HG01944	0	0	1	FALSE	haploid	TRUE	unrelated
HG01945	0	HG01945.LILRA7.tsv	0	0	1	PEL	AMR	HG01945	0	0	2	FALSE	haploid	TRUE	unrelated
HG01947	0	HG01947.LILRA7.tsv	0	0	1	PEL	AMR	HG01947	0	0	1	FALSE	haploid	TRUE	unrelated
HG01948	0	HG01948.LILRA7.tsv	0	0	1	PEL	AMR	HG01948	0	0	2	FALSE	haploid	TRUE	unrelated
HG01950	0	HG01950.LILRA7.tsv	0	0	1	PEL	AMR	HG01950	0	0	1	FALSE	haploid	TRUE	unrelated
HG01951	0	HG01951.LILRA7.tsv	0	0	1	PEL	AMR	HG01951	0	0	2	FALSE	haploid	TRUE	unrelated
HG01953	0	HG01953.LILRA7.tsv	0	0	1	PEL	AMR	HG01953	0	0	1	FALSE	haploid	TRUE	unrelated
HG01954	0	HG01954.LILRA7.tsv	0	0	1	PEL	AMR	HG01954	0	0	2	FALSE	haploid	TRUE	unrelated
HG01956	0	HG01956.LILRA7.tsv	0	0	1	ACB	AFR	HG01956	0	0	2	FALSE	haploid	TRUE	unrelated
HG01958	0	HG01958.LILRA7.tsv	0	0	1	ACB	AFR	HG01958	0	0	2	FALSE	haploid	TRUE	unrelated
HG01961	0	HG01961.LILRA7.tsv	0	0	1	PEL	AMR	HG01961	0	0	1	FALSE	haploid	TRUE	unrelated
HG01965	0	HG01965.LILRA7.tsv	0	0	1	PEL	AMR	HG01965	0	0	2	FALSE	haploid	TRUE	unrelated
HG01967	0	HG01967.LILRA7.tsv	0	0	1	PEL	AMR	HG01967	0	0	1	FALSE	haploid	TRUE	unrelated
HG01968	0	HG01968.LILRA7.tsv	0	0	1	PEL	AMR	HG01968	0	0	2	FALSE	haploid	TRUE	unrelated
HG01970	0	HG01970.LILRA7.tsv	0	0	1	PEL	AMR	HG01970	0	0	1	FALSE	haploid	TRUE	unrelated
HG01971	0	HG01971.LILRA7.tsv	0	0	1	PEL	AMR	HG01971	0	0	2	FALSE	haploid	TRUE	unrelated
HG01973	0	HG01973.LILRA7.tsv	0	0	1	PEL	AMR	HG01973	0	0	2	FALSE	haploid	TRUE	unrelated
HG01974	0	HG01974.LILRA7.tsv	0	0	1	PEL	AMR	HG01974	0	0	1	FALSE	haploid	TRUE	unrelated
HG01976	0	HG01976.LILRA7.tsv	0	0	1	PEL	AMR	HG01976	0	0	2	FALSE	haploid	TRUE	unrelated
HG01977	0	HG01977.LILRA7.tsv	0	0	1	PEL	AMR	HG01977	0	0	1	FALSE	haploid	TRUE	unrelated
HG01979	0	HG01979.LILRA7.tsv	0	0	1	PEL	AMR	HG01979	0	0	1	FALSE	haploid	TRUE	unrelated
HG01980	0	HG01980.LILRA7.tsv	0	0	1	PEL	AMR	HG01980	0	0	2	FALSE	haploid	TRUE	unrelated
HG01982	0	HG01982.LILRA7.tsv	0	0	1	PEL	AMR	HG01982	0	0	1	FALSE	haploid	TRUE	unrelated
HG01985	0	HG01985.LILRA7.tsv	0	0	1	ACB	AFR	HG01985	0	0	2	FALSE	haploid	TRUE	unrelated
HG01986	0	HG01986.LILRA7.tsv	0	0	1	ACB	AFR	HG01986	0	0	1	FALSE	haploid	TRUE	unrelated
HG01988	0	HG01988.LILRA7.tsv	0	0	1	ACB	AFR	HG01988	0	0	1	FALSE	haploid	TRUE	unrelated
HG01989	0	HG01989.LILRA7.tsv	0	0	1	ACB	AFR	HG01989	0	0	2	FALSE	haploid	TRUE	unrelated
HG01990	0	HG01990.LILRA7.tsv	0	0	1	ACB	AFR	HG01990	0	0	1	FALSE	haploid	TRUE	unrelated
HG01991	0	HG01991.LILRA7.tsv	0	0	1	PEL	AMR	HG01991	0	0	1	FALSE	haploid	TRUE	unrelated
HG01992	0	HG01992.LILRA7.tsv	0	0	1	PEL	AMR	HG01992	0	0	2	FALSE	haploid	TRUE	unrelated
HG01997	0	HG01997.LILRA7.tsv	0	0	1	PEL	AMR	HG01997	0	0	2	FALSE	haploid	TRUE	unrelated
HG02002	0	HG02002.LILRA7.tsv	0	0	1	PEL	AMR	HG02002	0	0	1	FALSE	haploid	TRUE	unrelated
HG02003	0	HG02003.LILRA7.tsv	0	0	1	PEL	AMR	HG02003	0	0	2	FALSE	haploid	TRUE	unrelated
HG02006	0	HG02006.LILRA7.tsv	0	0	1	PEL	AMR	HG02006	0	0	2	FALSE	haploid	TRUE	unrelated
HG02008	0	HG02008.LILRA7.tsv	0	0	1	PEL	AMR	HG02008	0	0	1	FALSE	haploid	TRUE	unrelated
HG02009	0	HG02009.LILRA7.tsv	0	0	1	ACB	AFR	HG02009	0	0	1	FALSE	haploid	TRUE	unrelated
HG02010	0	HG02010.LILRA7.tsv	0	0	1	ACB	AFR	HG02010	0	0	2	FALSE	haploid	TRUE	unrelated
HG02012	0	HG02012.LILRA7.tsv	0	0	1	ACB	AFR	HG02012	0	0	2	FALSE	haploid	TRUE	unrelated
HG02013	0	HG02013.LILRA7.tsv	0	0	1	ACB	AFR	HG02013	0	0	1	FALSE	haploid	TRUE	unrelated
HG02014	0	HG02014.LILRA7.tsv	0	0	1	ACB	AFR	HG02014	0	0	1	FALSE	haploid	TRUE	unrelated
HG02016	0	HG02016.LILRA7.tsv	0	0	1	KHV	EAS	HG02016	0	0	2	FALSE	haploid	TRUE	unrelated
HG02017	0	HG02017.LILRA7.tsv	0	0	1	KHV	EAS	HG02017	0	0	1	FALSE	haploid	TRUE	unrelated
HG02019	0	HG02019.LILRA7.tsv	0	0	1	KHV	EAS	HG02019	0	0	2	FALSE	haploid	TRUE	unrelated
HG02020	0	HG02020.LILRA7.tsv	0	0	1	KHV	EAS	HG02020	0	0	1	FALSE	haploid	TRUE	unrelated
HG02023	0	HG02023.LILRA7.tsv	0	0	1	KHV	EAS	HG02023	0	0	1	FALSE	haploid	TRUE	unrelated
HG02025	0	HG02025.LILRA7.tsv	0	0	1	KHV	EAS	HG02025	0	0	2	FALSE	haploid	TRUE	unrelated
HG02026	0	HG02026.LILRA7.tsv	0	0	1	KHV	EAS	HG02026	0	0	1	FALSE	haploid	TRUE	unrelated
HG02028	0	HG02028.LILRA7.tsv	0	0	1	KHV	EAS	HG02028	0	0	2	FALSE	haploid	TRUE	unrelated
HG02029	0	HG02029.LILRA7.tsv	0	0	1	KHV	EAS	HG02029	0	0	1	FALSE	haploid	TRUE	unrelated
HG02031	0	HG02031.LILRA7.tsv	0	0	1	KHV	EAS	HG02031	0	0	2	FALSE	haploid	TRUE	unrelated
HG02032	0	HG02032.LILRA7.tsv	0	0	1	KHV	EAS	HG02032	0	0	1	FALSE	haploid	TRUE	unrelated
HG02035	0	HG02035.LILRA7.tsv	0	0	1	KHV	EAS	HG02035	0	0	1	FALSE	haploid	TRUE	unrelated
HG02040	0	HG02040.LILRA7.tsv	0	0	1	KHV	EAS	HG02040	0	0	1	FALSE	haploid	TRUE	unrelated
HG02047	0	HG02047.LILRA7.tsv	0	0	1	KHV	EAS	HG02047	0	0	1	FALSE	haploid	TRUE	unrelated
HG02048	0	HG02048.LILRA7.tsv	0	0	1	KHV	EAS	HG02048	0	0	2	FALSE	haploid	TRUE	unrelated
HG02049	0	HG02049.LILRA7.tsv	0	0	1	KHV	EAS	HG02049	0	0	2	FALSE	haploid	TRUE	unrelated
HG02050	0	HG02050.LILRA7.tsv	0	0	1	KHV	EAS	HG02050	0	0	1	FALSE	haploid	TRUE	unrelated
HG02051	0	HG02051.LILRA7.tsv	0	0	1	ACB	AFR	HG02051	0	0	1	FALSE	haploid	TRUE	unrelated
HG02052	0	HG02052.LILRA7.tsv	0	0	1	ACB	AFR	HG02052	0	0	2	FALSE	haploid	TRUE	unrelated
HG02053	0	HG02053.LILRA7.tsv	0	0	1	ACB	AFR	HG02053	0	0	1	FALSE	haploid	TRUE	unrelated
HG02054	0	HG02054.LILRA7.tsv	0	0	1	ACB	AFR	HG02054	0	0	2	FALSE	haploid	TRUE	unrelated
HG02057	0	HG02057.LILRA7.tsv	0	0	1	KHV	EAS	HG02057	0	0	2	FALSE	haploid	TRUE	unrelated
HG02058	0	HG02058.LILRA7.tsv	0	0	1	KHV	EAS	HG02058	0	0	1	FALSE	haploid	TRUE	unrelated
HG02060	0	HG02060.LILRA7.tsv	0	0	1	KHV	EAS	HG02060	0	0	2	FALSE	haploid	TRUE	unrelated
HG02061	0	HG02061.LILRA7.tsv	0	0	1	KHV	EAS	HG02061	0	0	1	FALSE	haploid	TRUE	unrelated
HG02064	0	HG02064.LILRA7.tsv	0	0	1	KHV	EAS	HG02064	0	0	1	FALSE	haploid	TRUE	unrelated
HG02067	0	HG02067.LILRA7.tsv	0	0	1	KHV	EAS	HG02067	0	0	1	FALSE	haploid	TRUE	unrelated
HG02069	0	HG02069.LILRA7.tsv	0	0	1	KHV	EAS	HG02069	0	0	2	FALSE	haploid	TRUE	unrelated
HG02070	0	HG02070.LILRA7.tsv	0	0	1	KHV	EAS	HG02070	0	0	1	FALSE	haploid	TRUE	unrelated
HG02072	0	HG02072.LILRA7.tsv	0	0	1	KHV	EAS	HG02072	0	0	2	FALSE	haploid	TRUE	unrelated
HG02073	0	HG02073.LILRA7.tsv	0	0	1	KHV	EAS	HG02073	0	0	1	FALSE	haploid	TRUE	unrelated
HG02075	0	HG02075.LILRA7.tsv	0	0	1	KHV	EAS	HG02075	0	0	2	FALSE	haploid	TRUE	unrelated
HG02076	0	HG02076.LILRA7.tsv	0	0	1	KHV	EAS	HG02076	0	0	1	FALSE	haploid	TRUE	unrelated
HG02078	0	HG02078.LILRA7.tsv	0	0	1	KHV	EAS	HG02078	0	0	2	FALSE	haploid	TRUE	unrelated
HG02079	0	HG02079.LILRA7.tsv	0	0	1	KHV	EAS	HG02079	0	0	1	FALSE	haploid	TRUE	unrelated
HG02081	0	HG02081.LILRA7.tsv	0	0	1	KHV	EAS	HG02081	0	0	2	FALSE	haploid	TRUE	unrelated
HG02082	0	HG02082.LILRA7.tsv	0	0	1	KHV	EAS	HG02082	0	0	1	FALSE	haploid	TRUE	unrelated
HG02084	0	HG02084.LILRA7.tsv	0	0	1	KHV	EAS	HG02084	0	0	2	FALSE	haploid	TRUE	unrelated
HG02085	0	HG02085.LILRA7.tsv	0	0	1	KHV	EAS	HG02085	0	0	1	FALSE	haploid	TRUE	unrelated
HG02086	0	HG02086.LILRA7.tsv	0	0	1	KHV	EAS	HG02086	0	0	2	FALSE	haploid	TRUE	unrelated
HG02087	0	HG02087.LILRA7.tsv	0	0	1	KHV	EAS	HG02087	0	0	2	FALSE	haploid	TRUE	unrelated
HG02088	0	HG02088.LILRA7.tsv	0	0	1	KHV	EAS	HG02088	0	0	1	FALSE	haploid	TRUE	unrelated
HG02089	0	HG02089.LILRA7.tsv	0	0	1	PEL	AMR	HG02089	0	0	2	FALSE	haploid	TRUE	unrelated
HG02090	0	HG02090.LILRA7.tsv	0	0	1	PEL	AMR	HG02090	0	0	1	FALSE	haploid	TRUE	unrelated
HG02095	0	HG02095.LILRA7.tsv	0	0	1	ACB	AFR	HG02095	0	0	2	FALSE	haploid	TRUE	unrelated
HG02102	0	HG02102.LILRA7.tsv	0	0	1	PEL	AMR	HG02102	0	0	2	FALSE	haploid	TRUE	unrelated
HG02104	0	HG02104.LILRA7.tsv	0	0	1	PEL	AMR	HG02104	0	0	1	FALSE	haploid	TRUE	unrelated
HG02105	0	HG02105.LILRA7.tsv	0	0	1	PEL	AMR	HG02105	0	0	2	FALSE	haploid	TRUE	unrelated
HG02107	0	HG02107.LILRA7.tsv	0	0	1	ACB	AFR	HG02107	0	0	1	FALSE	haploid	TRUE	unrelated
HG02108	0	HG02108.LILRA7.tsv	0	0	1	ACB	AFR	HG02108	0	0	2	FALSE	haploid	TRUE	unrelated
HG02111	0	HG02111.LILRA7.tsv	0	0	1	ACB	AFR	HG02111	0	0	2	FALSE	haploid	TRUE	unrelated
HG02113	0	HG02113.LILRA7.tsv	0	0	1	KHV	EAS	HG02113	0	0	2	FALSE	haploid	TRUE	unrelated
HG02116	0	HG02116.LILRA7.tsv	0	0	1	KHV	EAS	HG02116	0	0	1	FALSE	haploid	TRUE	unrelated
HG02121	0	HG02121.LILRA7.tsv	0	0	1	KHV	EAS	HG02121	0	0	2	FALSE	haploid	TRUE	unrelated
HG02122	0	HG02122.LILRA7.tsv	0	0	1	KHV	EAS	HG02122	0	0	1	FALSE	haploid	TRUE	unrelated
HG02127	0	HG02127.LILRA7.tsv	0	0	1	KHV	EAS	HG02127	0	0	2	FALSE	haploid	TRUE	unrelated
HG02128	0	HG02128.LILRA7.tsv	0	0	1	KHV	EAS	HG02128	0	0	1	FALSE	haploid	TRUE	unrelated
HG02130	0	HG02130.LILRA7.tsv	0	0	1	KHV	EAS	HG02130	0	0	2	FALSE	haploid	TRUE	unrelated
HG02131	0	HG02131.LILRA7.tsv	0	0	1	KHV	EAS	HG02131	0	0	1	FALSE	haploid	TRUE	unrelated
HG02133	0	HG02133.LILRA7.tsv	0	0	1	KHV	EAS	HG02133	0	0	2	FALSE	haploid	TRUE	unrelated
HG02134	0	HG02134.LILRA7.tsv	0	0	1	KHV	EAS	HG02134	0	0	1	FALSE	haploid	TRUE	unrelated
HG02136	0	HG02136.LILRA7.tsv	0	0	1	KHV	EAS	HG02136	0	0	2	FALSE	haploid	TRUE	unrelated
HG02137	0	HG02137.LILRA7.tsv	0	0	1	KHV	EAS	HG02137	0	0	1	FALSE	haploid	TRUE	unrelated
HG02138	0	HG02138.LILRA7.tsv	0	0	1	KHV	EAS	HG02138	0	0	1	FALSE	haploid	TRUE	unrelated
HG02139	0	HG02139.LILRA7.tsv	0	0	1	KHV	EAS	HG02139	0	0	2	FALSE	haploid	TRUE	unrelated
HG02140	0	HG02140.LILRA7.tsv	0	0	1	KHV	EAS	HG02140	0	0	2	FALSE	haploid	TRUE	unrelated
HG02141	0	HG02141.LILRA7.tsv	0	0	1	KHV	EAS	HG02141	0	0	1	FALSE	haploid	TRUE	unrelated
HG02142	0	HG02142.LILRA7.tsv	0	0	1	KHV	EAS	HG02142	0	0	2	FALSE	haploid	TRUE	unrelated
HG02143	0	HG02143.LILRA7.tsv	0	0	1	ACB	AFR	HG02143	0	0	1	FALSE	haploid	TRUE	unrelated
HG02144	0	HG02144.LILRA7.tsv	0	0	1	ACB	AFR	HG02144	0	0	2	FALSE	haploid	TRUE	unrelated
HG02146	0	HG02146.LILRA7.tsv	0	0	1	PEL	AMR	HG02146	0	0	1	FALSE	haploid	TRUE	unrelated
HG02147	0	HG02147.LILRA7.tsv	0	0	1	PEL	AMR	HG02147	0	0	2	FALSE	haploid	TRUE	unrelated
HG02150	0	HG02150.LILRA7.tsv	0	0	1	PEL	AMR	HG02150	0	0	1	FALSE	haploid	TRUE	unrelated
HG02151	0	HG02151.LILRA7.tsv	0	0	1	CDX	EAS	HG02151	0	0	2	FALSE	haploid	TRUE	unrelated
HG02152	0	HG02152.LILRA7.tsv	0	0	1	CDX	EAS	HG02152	0	0	2	FALSE	haploid	TRUE	unrelated
HG02153	0	HG02153.LILRA7.tsv	0	0	1	CDX	EAS	HG02153	0	0	2	FALSE	haploid	TRUE	unrelated
HG02154	0	HG02154.LILRA7.tsv	0	0	1	CDX	EAS	HG02154	0	0	2	FALSE	haploid	TRUE	unrelated
HG02155	0	HG02155.LILRA7.tsv	0	0	1	CDX	EAS	HG02155	0	0	2	FALSE	haploid	TRUE	unrelated
HG02156	0	HG02156.LILRA7.tsv	0	0	1	CDX	EAS	HG02156	0	0	2	FALSE	haploid	TRUE	unrelated
HG02164	0	HG02164.LILRA7.tsv	0	0	1	CDX	EAS	HG02164	0	0	2	FALSE	haploid	TRUE	unrelated
HG02165	0	HG02165.LILRA7.tsv	0	0	1	CDX	EAS	HG02165	0	0	2	FALSE	haploid	TRUE	unrelated
HG02166	0	HG02166.LILRA7.tsv	0	0	1	CDX	EAS	HG02166	0	0	2	FALSE	haploid	TRUE	unrelated
HG02178	0	HG02178.LILRA7.tsv	0	0	1	CDX	EAS	HG02178	0	0	2	FALSE	haploid	TRUE	unrelated
HG02179	0	HG02179.LILRA7.tsv	0	0	1	CDX	EAS	HG02179	0	0	2	FALSE	haploid	TRUE	unrelated
HG02180	0	HG02180.LILRA7.tsv	0	0	1	CDX	EAS	HG02180	0	0	2	FALSE	haploid	TRUE	unrelated
HG02181	0	HG02181.LILRA7.tsv	0	0	1	CDX	EAS	HG02181	0	0	2	FALSE	haploid	TRUE	unrelated
HG02182	0	HG02182.LILRA7.tsv	0	0	1	CDX	EAS	HG02182	0	0	2	FALSE	haploid	TRUE	unrelated
HG02184	0	HG02184.LILRA7.tsv	0	0	1	CDX	EAS	HG02184	0	0	2	FALSE	haploid	TRUE	unrelated
HG02185	0	HG02185.LILRA7.tsv	0	0	1	CDX	EAS	HG02185	0	0	2	FALSE	haploid	TRUE	unrelated
HG02186	0	HG02186.LILRA7.tsv	0	0	1	CDX	EAS	HG02186	0	0	2	FALSE	haploid	TRUE	unrelated
HG02187	0	HG02187.LILRA7.tsv	0	0	1	CDX	EAS	HG02187	0	0	2	FALSE	haploid	TRUE	unrelated
HG02188	0	HG02188.LILRA7.tsv	0	0	1	CDX	EAS	HG02188	0	0	2	FALSE	haploid	TRUE	unrelated
HG02190	0	HG02190.LILRA7.tsv	0	0	1	CDX	EAS	HG02190	0	0	2	FALSE	haploid	TRUE	unrelated
HG02215	0	HG02215.LILRA7.tsv	0	0	1	GBR	EUR	HG02215	0	0	2	FALSE	haploid	TRUE	unrelated
HG02219	0	HG02219.LILRA7.tsv	0	0	1	IBS	EUR	HG02219	0	0	1	FALSE	haploid	TRUE	unrelated
HG02220	0	HG02220.LILRA7.tsv	0	0	1	IBS	EUR	HG02220	0	0	2	FALSE	haploid	TRUE	unrelated
HG02221	0	HG02221.LILRA7.tsv	0	0	1	IBS	EUR	HG02221	0	0	1	FALSE	haploid	TRUE	unrelated
HG02223	0	HG02223.LILRA7.tsv	0	0	1	IBS	EUR	HG02223	0	0	2	FALSE	haploid	TRUE	unrelated
HG02224	0	HG02224.LILRA7.tsv	0	0	1	IBS	EUR	HG02224	0	0	1	FALSE	haploid	TRUE	unrelated
HG02230	0	HG02230.LILRA7.tsv	0	0	1	IBS	EUR	HG02230	0	0	2	FALSE	haploid	TRUE	unrelated
HG02231	0	HG02231.LILRA7.tsv	0	0	1	IBS	EUR	HG02231	0	0	1	FALSE	haploid	TRUE	unrelated
HG02232	0	HG02232.LILRA7.tsv	0	0	1	IBS	EUR	HG02232	0	0	2	FALSE	haploid	TRUE	unrelated
HG02233	0	HG02233.LILRA7.tsv	0	0	1	IBS	EUR	HG02233	0	0	1	FALSE	haploid	TRUE	unrelated
HG02235	0	HG02235.LILRA7.tsv	0	0	1	IBS	EUR	HG02235	0	0	2	FALSE	haploid	TRUE	unrelated
HG02236	0	HG02236.LILRA7.tsv	0	0	1	IBS	EUR	HG02236	0	0	1	FALSE	haploid	TRUE	unrelated
HG02238	0	HG02238.LILRA7.tsv	0	0	1	IBS	EUR	HG02238	0	0	1	FALSE	haploid	TRUE	unrelated
HG02239	0	HG02239.LILRA7.tsv	0	0	1	IBS	EUR	HG02239	0	0	2	FALSE	haploid	TRUE	unrelated
HG02250	0	HG02250.LILRA7.tsv	0	0	1	CDX	EAS	HG02250	0	0	1	FALSE	haploid	TRUE	unrelated
HG02252	0	HG02252.LILRA7.tsv	0	0	1	PEL	AMR	HG02252	0	0	2	FALSE	haploid	TRUE	unrelated
HG02253	0	HG02253.LILRA7.tsv	0	0	1	PEL	AMR	HG02253	0	0	1	FALSE	haploid	TRUE	unrelated
HG02255	0	HG02255.LILRA7.tsv	0	0	1	ACB	AFR	HG02255	0	0	1	FALSE	haploid	TRUE	unrelated
HG02256	0	HG02256.LILRA7.tsv	0	0	1	ACB	AFR	HG02256	0	0	2	FALSE	haploid	TRUE	unrelated
HG02259	0	HG02259.LILRA7.tsv	0	0	1	PEL	AMR	HG02259	0	0	1	FALSE	haploid	TRUE	unrelated
HG02260	0	HG02260.LILRA7.tsv	0	0	1	PEL	AMR	HG02260	0	0	2	FALSE	haploid	TRUE	unrelated
HG02262	0	HG02262.LILRA7.tsv	0	0	1	PEL	AMR	HG02262	0	0	1	FALSE	haploid	TRUE	unrelated
HG02265	0	HG02265.LILRA7.tsv	0	0	1	PEL	AMR	HG02265	0	0	1	FALSE	haploid	TRUE	unrelated
HG02266	0	HG02266.LILRA7.tsv	0	0	1	PEL	AMR	HG02266	0	0	2	FALSE	haploid	TRUE	unrelated
HG02271	0	HG02271.LILRA7.tsv	0	0	1	PEL	AMR	HG02271	0	0	1	FALSE	haploid	TRUE	unrelated
HG02272	0	HG02272.LILRA7.tsv	0	0	1	PEL	AMR	HG02272	0	0	2	FALSE	haploid	TRUE	unrelated
HG02274	0	HG02274.LILRA7.tsv	0	0	1	PEL	AMR	HG02274	0	0	1	FALSE	haploid	TRUE	unrelated
HG02275	0	HG02275.LILRA7.tsv	0	0	1	PEL	AMR	HG02275	0	0	2	FALSE	haploid	TRUE	unrelated
HG02277	0	HG02277.LILRA7.tsv	0	0	1	PEL	AMR	HG02277	0	0	1	FALSE	haploid	TRUE	unrelated
HG02278	0	HG02278.LILRA7.tsv	0	0	1	PEL	AMR	HG02278	0	0	2	FALSE	haploid	TRUE	unrelated
HG02281	0	HG02281.LILRA7.tsv	0	0	1	ACB	AFR	HG02281	0	0	1	FALSE	haploid	TRUE	unrelated
HG02282	0	HG02282.LILRA7.tsv	0	0	1	ACB	AFR	HG02282	0	0	2	FALSE	haploid	TRUE	unrelated
HG02283	0	HG02283.LILRA7.tsv	0	0	1	ACB	AFR	HG02283	0	0	1	FALSE	haploid	TRUE	unrelated
HG02284	0	HG02284.LILRA7.tsv	0	0	1	ACB	AFR	HG02284	0	0	1	FALSE	haploid	TRUE	unrelated
HG02285	0	HG02285.LILRA7.tsv	0	0	1	PEL	AMR	HG02285	0	0	1	FALSE	haploid	TRUE	unrelated
HG02286	0	HG02286.LILRA7.tsv	0	0	1	PEL	AMR	HG02286	0	0	2	FALSE	haploid	TRUE	unrelated
HG02291	0	HG02291.LILRA7.tsv	0	0	1	PEL	AMR	HG02291	0	0	1	FALSE	haploid	TRUE	unrelated
HG02292	0	HG02292.LILRA7.tsv	0	0	1	PEL	AMR	HG02292	0	0	2	FALSE	haploid	TRUE	unrelated
HG02298	0	HG02298.LILRA7.tsv	0	0	1	PEL	AMR	HG02298	0	0	2	FALSE	haploid	TRUE	unrelated
HG02299	0	HG02299.LILRA7.tsv	0	0	1	PEL	AMR	HG02299	0	0	1	FALSE	haploid	TRUE	unrelated
HG02301	0	HG02301.LILRA7.tsv	0	0	1	PEL	AMR	HG02301	0	0	2	FALSE	haploid	TRUE	unrelated
HG02304	0	HG02304.LILRA7.tsv	0	0	1	PEL	AMR	HG02304	0	0	1	FALSE	haploid	TRUE	unrelated
HG02307	0	HG02307.LILRA7.tsv	0	0	1	ACB	AFR	HG02307	0	0	1	FALSE	haploid	TRUE	unrelated
HG02308	0	HG02308.LILRA7.tsv	0	0	1	ACB	AFR	HG02308	0	0	2	FALSE	haploid	TRUE	unrelated
HG02309	0	HG02309.LILRA7.tsv	0	0	1	ACB	AFR	HG02309	0	0	2	FALSE	haploid	TRUE	unrelated
HG02312	0	HG02312.LILRA7.tsv	0	0	1	PEL	AMR	HG02312	0	0	2	FALSE	haploid	TRUE	unrelated
HG02314	0	HG02314.LILRA7.tsv	0	0	1	ACB	AFR	HG02314	0	0	1	FALSE	haploid	TRUE	unrelated
HG02315	0	HG02315.LILRA7.tsv	0	0	1	ACB	AFR	HG02315	0	0	2	FALSE	haploid	TRUE	unrelated
HG02317	0	HG02317.LILRA7.tsv	0	0	1	ACB	AFR	HG02317	0	0	1	FALSE	haploid	TRUE	unrelated
HG02318	0	HG02318.LILRA7.tsv	0	0	1	ACB	AFR	HG02318	0	0	2	FALSE	haploid	TRUE	unrelated
HG02322	0	HG02322.LILRA7.tsv	0	0	1	ACB	AFR	HG02322	0	0	2	FALSE	haploid	TRUE	unrelated
HG02323	0	HG02323.LILRA7.tsv	0	0	1	ACB	AFR	HG02323	0	0	1	FALSE	haploid	TRUE	unrelated
HG02325	0	HG02325.LILRA7.tsv	0	0	1	ACB	AFR	HG02325	0	0	2	FALSE	haploid	TRUE	unrelated
HG02330	0	HG02330.LILRA7.tsv	0	0	1	ACB	AFR	HG02330	0	0	1	FALSE	haploid	TRUE	unrelated
HG02332	0	HG02332.LILRA7.tsv	0	0	1	ACB	AFR	HG02332	0	0	1	FALSE	haploid	TRUE	unrelated
HG02334	0	HG02334.LILRA7.tsv	0	0	1	ACB	AFR	HG02334	0	0	1	FALSE	haploid	TRUE	unrelated
HG02337	0	HG02337.LILRA7.tsv	0	0	1	ACB	AFR	HG02337	0	0	2	FALSE	haploid	TRUE	unrelated
HG02339	0	HG02339.LILRA7.tsv	0	0	1	ACB	AFR	HG02339	0	0	2	FALSE	haploid	TRUE	unrelated
HG02343	0	HG02343.LILRA7.tsv	0	0	1	ACB	AFR	HG02343	0	0	1	FALSE	haploid	TRUE	unrelated
HG02345	0	HG02345.LILRA7.tsv	0	0	1	PEL	AMR	HG02345	0	0	2	FALSE	haploid	TRUE	unrelated
HG02348	0	HG02348.LILRA7.tsv	0	0	1	PEL	AMR	HG02348	0	0	2	FALSE	haploid	TRUE	unrelated
HG02351	0	HG02351.LILRA7.tsv	0	0	1	CDX	EAS	HG02351	0	0	1	FALSE	haploid	TRUE	unrelated
HG02353	0	HG02353.LILRA7.tsv	0	0	1	CDX	EAS	HG02353	0	0	1	FALSE	haploid	TRUE	unrelated
HG02355	0	HG02355.LILRA7.tsv	0	0	1	CDX	EAS	HG02355	0	0	1	FALSE	haploid	TRUE	unrelated
HG02356	0	HG02356.LILRA7.tsv	0	0	1	CDX	EAS	HG02356	0	0	1	FALSE	haploid	TRUE	unrelated
HG02360	0	HG02360.LILRA7.tsv	0	0	1	CDX	EAS	HG02360	0	0	1	FALSE	haploid	TRUE	unrelated
HG02364	0	HG02364.LILRA7.tsv	0	0	1	CDX	EAS	HG02364	0	0	1	FALSE	haploid	TRUE	unrelated
HG02367	0	HG02367.LILRA7.tsv	0	0	1	CDX	EAS	HG02367	0	0	1	FALSE	haploid	TRUE	unrelated
HG02371	0	HG02371.LILRA7.tsv	0	0	1	CDX	EAS	HG02371	0	0	1	FALSE	haploid	TRUE	unrelated
HG02373	0	HG02373.LILRA7.tsv	0	0	1	CDX	EAS	HG02373	0	0	1	FALSE	haploid	TRUE	unrelated
HG02374	0	HG02374.LILRA7.tsv	0	0	1	CDX	EAS	HG02374	0	0	1	FALSE	haploid	TRUE	unrelated
HG02375	0	HG02375.LILRA7.tsv	0	0	1	CDX	EAS	HG02375	0	0	1	FALSE	haploid	TRUE	unrelated
HG02379	0	HG02379.LILRA7.tsv	0	0	1	CDX	EAS	HG02379	0	0	1	FALSE	haploid	TRUE	unrelated
HG02380	0	HG02380.LILRA7.tsv	0	0	1	CDX	EAS	HG02380	0	0	1	FALSE	haploid	TRUE	unrelated
HG02382	0	HG02382.LILRA7.tsv	0	0	1	CDX	EAS	HG02382	0	0	1	FALSE	haploid	TRUE	unrelated
HG02383	0	HG02383.LILRA7.tsv	0	0	1	CDX	EAS	HG02383	0	0	1	FALSE	haploid	TRUE	unrelated
HG02384	0	HG02384.LILRA7.tsv	0	0	1	CDX	EAS	HG02384	0	0	1	FALSE	haploid	TRUE	unrelated
HG02385	0	HG02385.LILRA7.tsv	0	0	1	CDX	EAS	HG02385	0	0	1	FALSE	haploid	TRUE	unrelated
HG02386	0	HG02386.LILRA7.tsv	0	0	1	CDX	EAS	HG02386	0	0	1	FALSE	haploid	TRUE	unrelated
HG02389	0	HG02389.LILRA7.tsv	0	0	1	CDX	EAS	HG02389	0	0	1	FALSE	haploid	TRUE	unrelated
HG02390	0	HG02390.LILRA7.tsv	0	0	1	CDX	EAS	HG02390	0	0	1	FALSE	haploid	TRUE	unrelated
HG02391	0	HG02391.LILRA7.tsv	0	0	1	CDX	EAS	HG02391	0	0	1	FALSE	haploid	TRUE	unrelated
HG02392	0	HG02392.LILRA7.tsv	0	0	1	CDX	EAS	HG02392	0	0	1	FALSE	haploid	TRUE	unrelated
HG02394	0	HG02394.LILRA7.tsv	0	0	1	CDX	EAS	HG02394	0	0	1	FALSE	haploid	TRUE	unrelated
HG02395	0	HG02395.LILRA7.tsv	0	0	1	CDX	EAS	HG02395	0	0	1	FALSE	haploid	TRUE	unrelated
HG02396	0	HG02396.LILRA7.tsv	0	0	1	CDX	EAS	HG02396	0	0	1	FALSE	haploid	TRUE	unrelated
HG02397	0	HG02397.LILRA7.tsv	0	0	1	CDX	EAS	HG02397	0	0	1	FALSE	haploid	TRUE	unrelated
HG02398	0	HG02398.LILRA7.tsv	0	0	1	CDX	EAS	HG02398	0	0	1	FALSE	haploid	TRUE	unrelated
HG02399	0	HG02399.LILRA7.tsv	0	0	1	CDX	EAS	HG02399	0	0	1	FALSE	haploid	TRUE	unrelated
HG02401	0	HG02401.LILRA7.tsv	0	0	1	CDX	EAS	HG02401	0	0	1	FALSE	haploid	TRUE	unrelated
HG02402	0	HG02402.LILRA7.tsv	0	0	1	CDX	EAS	HG02402	0	0	1	FALSE	haploid	TRUE	unrelated
HG02406	0	HG02406.LILRA7.tsv	0	0	1	CDX	EAS	HG02406	0	0	1	FALSE	haploid	TRUE	unrelated
HG02407	0	HG02407.LILRA7.tsv	0	0	1	CDX	EAS	HG02407	0	0	1	FALSE	haploid	TRUE	unrelated
HG02408	0	HG02408.LILRA7.tsv	0	0	1	CDX	EAS	HG02408	0	0	1	FALSE	haploid	TRUE	unrelated
HG02409	0	HG02409.LILRA7.tsv	0	0	1	CDX	EAS	HG02409	0	0	1	FALSE	haploid	TRUE	unrelated
HG02410	0	HG02410.LILRA7.tsv	0	0	1	CDX	EAS	HG02410	0	0	1	FALSE	haploid	TRUE	unrelated
HG02419	0	HG02419.LILRA7.tsv	0	0	1	ACB	AFR	HG02419	0	0	2	FALSE	haploid	TRUE	unrelated
HG02420	0	HG02420.LILRA7.tsv	0	0	1	ACB	AFR	HG02420	0	0	1	FALSE	haploid	TRUE	unrelated
HG02425	0	HG02425.LILRA7.tsv	0	0	1	PEL	AMR	HG02425	0	0	2	FALSE	haploid	TRUE	unrelated
HG02427	0	HG02427.LILRA7.tsv	0	0	1	ACB	AFR	HG02427	0	0	2	FALSE	haploid	TRUE	unrelated
HG02429	0	HG02429.LILRA7.tsv	0	0	1	ACB	AFR	HG02429	0	0	1	FALSE	haploid	TRUE	unrelated
HG02433	0	HG02433.LILRA7.tsv	0	0	1	ACB	AFR	HG02433	0	0	1	FALSE	haploid	TRUE	unrelated
HG02439	0	HG02439.LILRA7.tsv	0	0	1	ACB	AFR	HG02439	0	0	1	FALSE	haploid	TRUE	unrelated
HG02442	0	HG02442.LILRA7.tsv	0	0	1	ACB	AFR	HG02442	0	0	1	FALSE	haploid	TRUE	unrelated
HG02445	0	HG02445.LILRA7.tsv	0	0	1	ACB	AFR	HG02445	0	0	1	FALSE	haploid	TRUE	unrelated
HG02449	0	HG02449.LILRA7.tsv	0	0	1	ACB	AFR	HG02449	0	0	1	FALSE	haploid	TRUE	unrelated
HG02450	0	HG02450.LILRA7.tsv	0	0	1	ACB	AFR	HG02450	0	0	2	FALSE	haploid	TRUE	unrelated
HG02455	0	HG02455.LILRA7.tsv	0	0	1	ACB	AFR	HG02455	0	0	1	FALSE	haploid	TRUE	unrelated
HG02461	0	HG02461.LILRA7.tsv	0	0	1	GWD	AFR	HG02461	0	0	1	FALSE	haploid	TRUE	unrelated
HG02462	0	HG02462.LILRA7.tsv	0	0	1	GWD	AFR	HG02462	0	0	2	FALSE	haploid	TRUE	unrelated
HG02464	0	HG02464.LILRA7.tsv	0	0	1	GWD	AFR	HG02464	0	0	1	FALSE	haploid	TRUE	unrelated
HG02465	0	HG02465.LILRA7.tsv	0	0	1	GWD	AFR	HG02465	0	0	2	FALSE	haploid	TRUE	unrelated
HG02470	0	HG02470.LILRA7.tsv	0	0	1	ACB	AFR	HG02470	0	0	1	FALSE	haploid	TRUE	unrelated
HG02471	0	HG02471.LILRA7.tsv	0	0	1	ACB	AFR	HG02471	0	0	2	FALSE	haploid	TRUE	unrelated
HG02476	0	HG02476.LILRA7.tsv	0	0	1	ACB	AFR	HG02476	0	0	2	FALSE	haploid	TRUE	unrelated
HG02477	0	HG02477.LILRA7.tsv	0	0	1	ACB	AFR	HG02477	0	0	2	FALSE	haploid	TRUE	unrelated
HG02479	0	HG02479.LILRA7.tsv	0	0	1	ACB	AFR	HG02479	0	0	2	FALSE	haploid	TRUE	unrelated
HG02481	0	HG02481.LILRA7.tsv	0	0	1	ACB	AFR	HG02481	0	0	1	FALSE	haploid	TRUE	unrelated
HG02484	0	HG02484.LILRA7.tsv	0	0	1	ACB	AFR	HG02484	0	0	1	FALSE	haploid	TRUE	unrelated
HG02485	0	HG02485.LILRA7.tsv	0	0	1	ACB	AFR	HG02485	0	0	2	FALSE	haploid	TRUE	unrelated
HG02489	0	HG02489.LILRA7.tsv	0	0	1	ACB	AFR	HG02489	0	0	1	FALSE	haploid	TRUE	unrelated
HG02490	0	HG02490.LILRA7.tsv	0	0	1	PJL	SAS	HG02490	0	0	1	FALSE	haploid	TRUE	unrelated
HG02491	0	HG02491.LILRA7.tsv	0	0	1	PJL	SAS	HG02491	0	0	2	FALSE	haploid	TRUE	unrelated
HG02493	0	HG02493.LILRA7.tsv	0	0	1	PJL	SAS	HG02493	0	0	1	FALSE	haploid	TRUE	unrelated
HG02494	0	HG02494.LILRA7.tsv	0	0	1	PJL	SAS	HG02494	0	0	2	FALSE	haploid	TRUE	unrelated
HG02496	0	HG02496.LILRA7.tsv	0	0	1	ACB	AFR	HG02496	0	0	1	FALSE	haploid	TRUE	unrelated
HG02497	0	HG02497.LILRA7.tsv	0	0	1	ACB	AFR	HG02497	0	0	2	FALSE	haploid	TRUE	unrelated
HG02501	0	HG02501.LILRA7.tsv	0	0	1	ACB	AFR	HG02501	0	0	1	FALSE	haploid	TRUE	unrelated
HG02502	0	HG02502.LILRA7.tsv	0	0	1	ACB	AFR	HG02502	0	0	2	FALSE	haploid	TRUE	unrelated
HG02505	0	HG02505.LILRA7.tsv	0	0	1	ACB	AFR	HG02505	0	0	2	FALSE	haploid	TRUE	unrelated
HG02508	0	HG02508.LILRA7.tsv	0	0	1	ACB	AFR	HG02508	0	0	2	FALSE	haploid	TRUE	unrelated
HG02511	0	HG02511.LILRA7.tsv	0	0	1	ACB	AFR	HG02511	0	0	2	FALSE	haploid	TRUE	unrelated
HG02512	0	HG02512.LILRA7.tsv	0	0	1	KHV	EAS	HG02512	0	0	1	FALSE	haploid	TRUE	unrelated
HG02513	0	HG02513.LILRA7.tsv	0	0	1	KHV	EAS	HG02513	0	0	2	FALSE	haploid	TRUE	unrelated
HG02521	0	HG02521.LILRA7.tsv	0	0	1	KHV	EAS	HG02521	0	0	1	FALSE	haploid	TRUE	unrelated
HG02522	0	HG02522.LILRA7.tsv	0	0	1	KHV	EAS	HG02522	0	0	2	FALSE	haploid	TRUE	unrelated
HG02536	0	HG02536.LILRA7.tsv	0	0	1	ACB	AFR	HG02536	0	0	1	FALSE	haploid	TRUE	unrelated
HG02537	0	HG02537.LILRA7.tsv	0	0	1	ACB	AFR	HG02537	0	0	2	FALSE	haploid	TRUE	unrelated
HG02541	0	HG02541.LILRA7.tsv	0	0	1	ACB	AFR	HG02541	0	0	1	FALSE	haploid	TRUE	unrelated
HG02545	0	HG02545.LILRA7.tsv	0	0	1	ACB	AFR	HG02545	0	0	1	FALSE	haploid	TRUE	unrelated
HG02546	0	HG02546.LILRA7.tsv	0	0	1	ACB	AFR	HG02546	0	0	2	FALSE	haploid	TRUE	unrelated
HG02549	0	HG02549.LILRA7.tsv	0	0	1	ACB	AFR	HG02549	0	0	2	FALSE	haploid	TRUE	unrelated
HG02554	0	HG02554.LILRA7.tsv	0	0	1	ACB	AFR	HG02554	0	0	1	FALSE	haploid	TRUE	unrelated
HG02555	0	HG02555.LILRA7.tsv	0	0	1	ACB	AFR	HG02555	0	0	2	FALSE	haploid	TRUE	unrelated
HG02557	0	HG02557.LILRA7.tsv	0	0	1	ACB	AFR	HG02557	0	0	1	FALSE	haploid	TRUE	unrelated
HG02558	0	HG02558.LILRA7.tsv	0	0	1	ACB	AFR	HG02558	0	0	2	FALSE	haploid	TRUE	unrelated
HG02561	0	HG02561.LILRA7.tsv	0	0	1	GWD	AFR	HG02561	0	0	1	FALSE	haploid	TRUE	unrelated
HG02562	0	HG02562.LILRA7.tsv	0	0	1	GWD	AFR	HG02562	0	0	2	FALSE	haploid	TRUE	unrelated
HG02568	0	HG02568.LILRA7.tsv	0	0	1	GWD	AFR	HG02568	0	0	2	FALSE	haploid	TRUE	unrelated
HG02570	0	HG02570.LILRA7.tsv	0	0	1	GWD	AFR	HG02570	0	0	1	FALSE	haploid	TRUE	unrelated
HG02571	0	HG02571.LILRA7.tsv	0	0	1	GWD	AFR	HG02571	0	0	2	FALSE	haploid	TRUE	unrelated
HG02573	0	HG02573.LILRA7.tsv	0	0	1	GWD	AFR	HG02573	0	0	1	FALSE	haploid	TRUE	unrelated
HG02574	0	HG02574.LILRA7.tsv	0	0	1	GWD	AFR	HG02574	0	0	2	FALSE	haploid	TRUE	unrelated
HG02577	0	HG02577.LILRA7.tsv	0	0	1	ACB	AFR	HG02577	0	0	2	FALSE	haploid	TRUE	unrelated
HG02580	0	HG02580.LILRA7.tsv	0	0	1	ACB	AFR	HG02580	0	0	2	FALSE	haploid	TRUE	unrelated
HG02582	0	HG02582.LILRA7.tsv	0	0	1	GWD	AFR	HG02582	0	0	1	FALSE	haploid	TRUE	unrelated
HG02583	0	HG02583.LILRA7.tsv	0	0	1	GWD	AFR	HG02583	0	0	2	FALSE	haploid	TRUE	unrelated
HG02585	0	HG02585.LILRA7.tsv	0	0	1	GWD	AFR	HG02585	0	0	1	FALSE	haploid	TRUE	unrelated
HG02586	0	HG02586.LILRA7.tsv	0	0	1	GWD	AFR	HG02586	0	0	2	FALSE	haploid	TRUE	unrelated
HG02588	0	HG02588.LILRA7.tsv	0	0	1	GWD	AFR	HG02588	0	0	1	FALSE	haploid	TRUE	unrelated
HG02589	0	HG02589.LILRA7.tsv	0	0	1	GWD	AFR	HG02589	0	0	2	FALSE	haploid	TRUE	unrelated
HG02594	0	HG02594.LILRA7.tsv	0	0	1	GWD	AFR	HG02594	0	0	1	FALSE	haploid	TRUE	unrelated
HG02595	0	HG02595.LILRA7.tsv	0	0	1	GWD	AFR	HG02595	0	0	2	FALSE	haploid	TRUE	unrelated
HG02597	0	HG02597.LILRA7.tsv	0	0	1	PJL	SAS	HG02597	0	0	1	FALSE	haploid	TRUE	unrelated
HG02600	0	HG02600.LILRA7.tsv	0	0	1	PJL	SAS	HG02600	0	0	1	FALSE	haploid	TRUE	unrelated
HG02601	0	HG02601.LILRA7.tsv	0	0	1	PJL	SAS	HG02601	0	0	2	FALSE	haploid	TRUE	unrelated
HG02603	0	HG02603.LILRA7.tsv	0	0	1	PJL	SAS	HG02603	0	0	1	FALSE	haploid	TRUE	unrelated
HG02604	0	HG02604.LILRA7.tsv	0	0	1	PJL	SAS	HG02604	0	0	2	FALSE	haploid	TRUE	unrelated
HG02610	0	HG02610.LILRA7.tsv	0	0	1	GWD	AFR	HG02610	0	0	1	FALSE	haploid	TRUE	unrelated
HG02611	0	HG02611.LILRA7.tsv	0	0	1	GWD	AFR	HG02611	0	0	2	FALSE	haploid	TRUE	unrelated
HG02613	0	HG02613.LILRA7.tsv	0	0	1	GWD	AFR	HG02613	0	0	1	FALSE	haploid	TRUE	unrelated
HG02614	0	HG02614.LILRA7.tsv	0	0	1	GWD	AFR	HG02614	0	0	2	FALSE	haploid	TRUE	unrelated
HG02620	0	HG02620.LILRA7.tsv	0	0	1	GWD	AFR	HG02620	0	0	1	FALSE	haploid	TRUE	unrelated
HG02621	0	HG02621.LILRA7.tsv	0	0	1	GWD	AFR	HG02621	0	0	2	FALSE	haploid	TRUE	unrelated
HG02623	0	HG02623.LILRA7.tsv	0	0	1	GWD	AFR	HG02623	0	0	1	FALSE	haploid	TRUE	unrelated
HG02624	0	HG02624.LILRA7.tsv	0	0	1	GWD	AFR	HG02624	0	0	2	FALSE	haploid	TRUE	unrelated
HG02628	0	HG02628.LILRA7.tsv	0	0	1	GWD	AFR	HG02628	0	0	1	FALSE	haploid	TRUE	unrelated
HG02629	0	HG02629.LILRA7.tsv	0	0	1	GWD	AFR	HG02629	0	0	2	FALSE	haploid	TRUE	unrelated
HG02634	0	HG02634.LILRA7.tsv	0	0	1	GWD	AFR	HG02634	0	0	1	FALSE	haploid	TRUE	unrelated
HG02635	0	HG02635.LILRA7.tsv	0	0	1	GWD	AFR	HG02635	0	0	2	FALSE	haploid	TRUE	unrelated
HG02642	0	HG02642.LILRA7.tsv	0	0	1	GWD	AFR	HG02642	0	0	1	FALSE	haploid	TRUE	unrelated
HG02643	0	HG02643.LILRA7.tsv	0	0	1	GWD	AFR	HG02643	0	0	2	FALSE	haploid	TRUE	unrelated
HG02645	0	HG02645.LILRA7.tsv	0	0	1	GWD	AFR	HG02645	0	0	1	FALSE	haploid	TRUE	unrelated
HG02646	0	HG02646.LILRA7.tsv	0	0	1	GWD	AFR	HG02646	0	0	2	FALSE	haploid	TRUE	unrelated
HG02648	0	HG02648.LILRA7.tsv	0	0	1	PJL	SAS	HG02648	0	0	1	FALSE	haploid	TRUE	unrelated
HG02649	0	HG02649.LILRA7.tsv	0	0	1	PJL	SAS	HG02649	0	0	2	FALSE	haploid	TRUE	unrelated
HG02651	0	HG02651.LILRA7.tsv	0	0	1	PJL	SAS	HG02651	0	0	1	FALSE	haploid	TRUE	unrelated
HG02652	0	HG02652.LILRA7.tsv	0	0	1	PJL	SAS	HG02652	0	0	2	FALSE	haploid	TRUE	unrelated
HG02654	0	HG02654.LILRA7.tsv	0	0	1	PJL	SAS	HG02654	0	0	1	FALSE	haploid	TRUE	unrelated
HG02655	0	HG02655.LILRA7.tsv	0	0	1	PJL	SAS	HG02655	0	0	2	FALSE	haploid	TRUE	unrelated
HG02657	0	HG02657.LILRA7.tsv	0	0	1	PJL	SAS	HG02657	0	0	1	FALSE	haploid	TRUE	unrelated
HG02658	0	HG02658.LILRA7.tsv	0	0	1	PJL	SAS	HG02658	0	0	2	FALSE	haploid	TRUE	unrelated
HG02660	0	HG02660.LILRA7.tsv	0	0	1	PJL	SAS	HG02660	0	0	1	FALSE	haploid	TRUE	unrelated
HG02661	0	HG02661.LILRA7.tsv	0	0	1	PJL	SAS	HG02661	0	0	2	FALSE	haploid	TRUE	unrelated
HG02666	0	HG02666.LILRA7.tsv	0	0	1	GWD	AFR	HG02666	0	0	1	FALSE	haploid	TRUE	unrelated
HG02667	0	HG02667.LILRA7.tsv	0	0	1	GWD	AFR	HG02667	0	0	2	FALSE	haploid	TRUE	unrelated
HG02675	0	HG02675.LILRA7.tsv	0	0	1	GWD	AFR	HG02675	0	0	1	FALSE	haploid	TRUE	unrelated
HG02676	0	HG02676.LILRA7.tsv	0	0	1	GWD	AFR	HG02676	0	0	2	FALSE	haploid	TRUE	unrelated
HG02678	0	HG02678.LILRA7.tsv	0	0	1	GWD	AFR	HG02678	0	0	1	FALSE	haploid	TRUE	unrelated
HG02679	0	HG02679.LILRA7.tsv	0	0	1	GWD	AFR	HG02679	0	0	2	FALSE	haploid	TRUE	unrelated
HG02681	215	HG02681.LILRA7.tsv	5.37528	1	0.999999	PJL	SAS	HG02681	0	0	1	FALSE	haploid	TRUE	unrelated
HG02682	0	HG02682.LILRA7.tsv	0	0	1	PJL	SAS	HG02682	0	0	2	FALSE	haploid	TRUE	unrelated
HG02684	232	HG02684.LILRA7.tsv	5.45104	1	0.999999	PJL	SAS	HG02684	0	0	1	FALSE	haploid	TRUE	unrelated
HG02685	0	HG02685.LILRA7.tsv	0	0	1	PJL	SAS	HG02685	0	0	2	FALSE	haploid	TRUE	unrelated
HG02687	0	HG02687.LILRA7.tsv	0	0	1	PJL	SAS	HG02687	0	0	1	FALSE	haploid	TRUE	unrelated
HG02688	0	HG02688.LILRA7.tsv	0	0	1	PJL	SAS	HG02688	0	0	2	FALSE	haploid	TRUE	unrelated
HG02690	0	HG02690.LILRA7.tsv	0	0	1	PJL	SAS	HG02690	0	0	1	FALSE	haploid	TRUE	unrelated
HG02691	0	HG02691.LILRA7.tsv	0	0	1	PJL	SAS	HG02691	0	0	2	FALSE	haploid	TRUE	unrelated
HG02694	0	HG02694.LILRA7.tsv	0	0	1	PJL	SAS	HG02694	0	0	2	FALSE	haploid	TRUE	unrelated
HG02696	0	HG02696.LILRA7.tsv	0	0	1	PJL	SAS	HG02696	0	0	1	FALSE	haploid	TRUE	unrelated
HG02697	0	HG02697.LILRA7.tsv	0	0	1	PJL	SAS	HG02697	0	0	2	FALSE	haploid	TRUE	unrelated
HG02699	0	HG02699.LILRA7.tsv	0	0	1	PJL	SAS	HG02699	0	0	1	FALSE	haploid	TRUE	unrelated
HG02700	0	HG02700.LILRA7.tsv	0	0	1	PJL	SAS	HG02700	0	0	2	FALSE	haploid	TRUE	unrelated
HG02702	0	HG02702.LILRA7.tsv	0	0	1	GWD	AFR	HG02702	0	0	1	FALSE	haploid	TRUE	unrelated
HG02703	0	HG02703.LILRA7.tsv	0	0	1	GWD	AFR	HG02703	0	0	2	FALSE	haploid	TRUE	unrelated
HG02715	0	HG02715.LILRA7.tsv	0	0	1	GWD	AFR	HG02715	0	0	1	FALSE	haploid	TRUE	unrelated
HG02716	0	HG02716.LILRA7.tsv	0	0	1	GWD	AFR	HG02716	0	0	2	FALSE	haploid	TRUE	unrelated
HG02721	0	HG02721.LILRA7.tsv	0	0	1	GWD	AFR	HG02721	0	0	1	FALSE	haploid	TRUE	unrelated
HG02722	0	HG02722.LILRA7.tsv	0	0	1	GWD	AFR	HG02722	0	0	2	FALSE	haploid	TRUE	unrelated
HG02724	255	HG02724.LILRA7.tsv	5.54518	1	0.999994	PJL	SAS	HG02724	0	0	1	FALSE	haploid	TRUE	unrelated
HG02725	0	HG02725.LILRA7.tsv	0	0	1	PJL	SAS	HG02725	0	0	2	FALSE	haploid	TRUE	unrelated
HG02727	0	HG02727.LILRA7.tsv	0	0	1	PJL	SAS	HG02727	0	0	1	FALSE	haploid	TRUE	unrelated
HG02728	0	HG02728.LILRA7.tsv	0	0	1	PJL	SAS	HG02728	0	0	2	FALSE	haploid	TRUE	unrelated
HG02731	229	HG02731.LILRA7.tsv	5.43808	1	0.999999	PJL	SAS	HG02731	0	0	2	FALSE	haploid	TRUE	unrelated
HG02733	0	HG02733.LILRA7.tsv	0	0	1	PJL	SAS	HG02733	0	0	1	FALSE	haploid	TRUE	unrelated
HG02734	0	HG02734.LILRA7.tsv	0	0	1	PJL	SAS	HG02734	0	0	2	FALSE	haploid	TRUE	unrelated
HG02736	223	HG02736.LILRA7.tsv	5.41165	1	0.999999	PJL	SAS	HG02736	0	0	1	FALSE	haploid	TRUE	unrelated
HG02737	0	HG02737.LILRA7.tsv	0	0	1	PJL	SAS	HG02737	0	0	2	FALSE	haploid	TRUE	unrelated
HG02756	0	HG02756.LILRA7.tsv	0	0	1	GWD	AFR	HG02756	0	0	1	FALSE	haploid	TRUE	unrelated
HG02757	0	HG02757.LILRA7.tsv	0	0	1	GWD	AFR	HG02757	0	0	2	FALSE	haploid	TRUE	unrelated
HG02759	0	HG02759.LILRA7.tsv	0	0	1	GWD	AFR	HG02759	0	0	1	FALSE	haploid	TRUE	unrelated
HG02760	0	HG02760.LILRA7.tsv	0	0	1	GWD	AFR	HG02760	0	0	2	FALSE	haploid	TRUE	unrelated
HG02763	0	HG02763.LILRA7.tsv	0	0	1	GWD	AFR	HG02763	0	0	2	FALSE	haploid	TRUE	unrelated
HG02768	0	HG02768.LILRA7.tsv	0	0	1	GWD	AFR	HG02768	0	0	1	FALSE	haploid	TRUE	unrelated
HG02769	0	HG02769.LILRA7.tsv	0	0	1	GWD	AFR	HG02769	0	0	2	FALSE	haploid	TRUE	unrelated
HG02771	0	HG02771.LILRA7.tsv	0	0	1	GWD	AFR	HG02771	0	0	1	FALSE	haploid	TRUE	unrelated
HG02772	0	HG02772.LILRA7.tsv	0	0	1	GWD	AFR	HG02772	0	0	2	FALSE	haploid	TRUE	unrelated
HG02774	0	HG02774.LILRA7.tsv	0	0	1	PJL	SAS	HG02774	0	0	1	FALSE	haploid	TRUE	unrelated
HG02775	0	HG02775.LILRA7.tsv	0	0	1	PJL	SAS	HG02775	0	0	2	FALSE	haploid	TRUE	unrelated
HG02778	0	HG02778.LILRA7.tsv	0	0	1	PJL	SAS	HG02778	0	0	2	FALSE	haploid	TRUE	unrelated
HG02780	0	HG02780.LILRA7.tsv	0	0	1	PJL	SAS	HG02780	0	0	1	FALSE	haploid	TRUE	unrelated
HG02783	0	HG02783.LILRA7.tsv	0	0	1	PJL	SAS	HG02783	0	0	1	FALSE	haploid	TRUE	unrelated
HG02784	0	HG02784.LILRA7.tsv	0	0	1	PJL	SAS	HG02784	0	0	2	FALSE	haploid	TRUE	unrelated
HG02786	0	HG02786.LILRA7.tsv	0	0	1	PJL	SAS	HG02786	0	0	1	FALSE	haploid	TRUE	unrelated
HG02787	0	HG02787.LILRA7.tsv	0	0	1	PJL	SAS	HG02787	0	0	2	FALSE	haploid	TRUE	unrelated
HG02789	0	HG02789.LILRA7.tsv	0	0	1	PJL	SAS	HG02789	0	0	1	FALSE	haploid	TRUE	unrelated
HG02790	0	HG02790.LILRA7.tsv	0	0	1	PJL	SAS	HG02790	0	0	2	FALSE	haploid	TRUE	unrelated
HG02792	453	HG02792.LILRA7.tsv	6.1181	2	0.627837	PJL	SAS	HG02792	0	0	1	FALSE	diploid	TRUE	unrelated
HG02793	0	HG02793.LILRA7.tsv	0	0	1	PJL	SAS	HG02793	0	0	2	FALSE	haploid	TRUE	unrelated
HG02798	0	HG02798.LILRA7.tsv	0	0	1	GWD	AFR	HG02798	0	0	1	FALSE	haploid	TRUE	unrelated
HG02799	0	HG02799.LILRA7.tsv	0	0	1	GWD	AFR	HG02799	0	0	2	FALSE	haploid	TRUE	unrelated
HG02804	0	HG02804.LILRA7.tsv	0	0	1	GWD	AFR	HG02804	0	0	1	FALSE	haploid	TRUE	unrelated
HG02805	0	HG02805.LILRA7.tsv	0	0	1	GWD	AFR	HG02805	0	0	2	FALSE	haploid	TRUE	unrelated
HG02807	0	HG02807.LILRA7.tsv	0	0	1	GWD	AFR	HG02807	0	0	1	FALSE	haploid	TRUE	unrelated
HG02808	0	HG02808.LILRA7.tsv	0	0	1	GWD	AFR	HG02808	0	0	2	FALSE	haploid	TRUE	unrelated
HG02810	0	HG02810.LILRA7.tsv	0	0	1	GWD	AFR	HG02810	0	0	1	FALSE	haploid	TRUE	unrelated
HG02811	0	HG02811.LILRA7.tsv	0	0	1	GWD	AFR	HG02811	0	0	2	FALSE	haploid	TRUE	unrelated
HG02813	0	HG02813.LILRA7.tsv	0	0	1	GWD	AFR	HG02813	0	0	1	FALSE	haploid	TRUE	unrelated
HG02814	0	HG02814.LILRA7.tsv	0	0	1	GWD	AFR	HG02814	0	0	2	FALSE	haploid	TRUE	unrelated
HG02816	0	HG02816.LILRA7.tsv	0	0	1	GWD	AFR	HG02816	0	0	1	FALSE	haploid	TRUE	unrelated
HG02817	0	HG02817.LILRA7.tsv	0	0	1	GWD	AFR	HG02817	0	0	2	FALSE	haploid	TRUE	unrelated
HG02819	0	HG02819.LILRA7.tsv	0	0	1	GWD	AFR	HG02819	0	0	1	FALSE	haploid	TRUE	unrelated
HG02820	0	HG02820.LILRA7.tsv	0	0	1	GWD	AFR	HG02820	0	0	2	FALSE	haploid	TRUE	unrelated
HG02836	0	HG02836.LILRA7.tsv	0	0	1	GWD	AFR	HG02836	0	0	1	FALSE	haploid	TRUE	unrelated
HG02837	0	HG02837.LILRA7.tsv	0	0	1	GWD	AFR	HG02837	0	0	2	FALSE	haploid	TRUE	unrelated
HG02839	0	HG02839.LILRA7.tsv	0	0	1	GWD	AFR	HG02839	0	0	1	FALSE	haploid	TRUE	unrelated
HG02840	0	HG02840.LILRA7.tsv	0	0	1	GWD	AFR	HG02840	0	0	2	FALSE	haploid	TRUE	unrelated
HG02851	0	HG02851.LILRA7.tsv	0	0	1	GWD	AFR	HG02851	0	0	1	FALSE	haploid	TRUE	unrelated
HG02852	0	HG02852.LILRA7.tsv	0	0	1	GWD	AFR	HG02852	0	0	2	FALSE	haploid	TRUE	unrelated
HG02854	0	HG02854.LILRA7.tsv	0	0	1	GWD	AFR	HG02854	0	0	1	FALSE	haploid	TRUE	unrelated
HG02855	0	HG02855.LILRA7.tsv	0	0	1	GWD	AFR	HG02855	0	0	2	FALSE	haploid	TRUE	unrelated
HG02860	0	HG02860.LILRA7.tsv	0	0	1	GWD	AFR	HG02860	0	0	1	FALSE	haploid	TRUE	unrelated
HG02861	0	HG02861.LILRA7.tsv	0	0	1	GWD	AFR	HG02861	0	0	2	FALSE	haploid	TRUE	unrelated
HG02870	2	HG02870.LILRA7.tsv	1.09861	0	0.999999	GWD	AFR	HG02870	0	0	2	FALSE	haploid	TRUE	unrelated
HG02878	0	HG02878.LILRA7.tsv	0	0	1	GWD	AFR	HG02878	0	0	1	FALSE	haploid	TRUE	unrelated
HG02879	0	HG02879.LILRA7.tsv	0	0	1	GWD	AFR	HG02879	0	0	2	FALSE	haploid	TRUE	unrelated
HG02881	0	HG02881.LILRA7.tsv	0	0	1	GWD	AFR	HG02881	0	0	1	FALSE	haploid	TRUE	unrelated
HG02882	0	HG02882.LILRA7.tsv	0	0	1	GWD	AFR	HG02882	0	0	2	FALSE	haploid	TRUE	unrelated
HG02884	0	HG02884.LILRA7.tsv	0	0	1	GWD	AFR	HG02884	0	0	1	FALSE	haploid	TRUE	unrelated
HG02885	0	HG02885.LILRA7.tsv	0	0	1	GWD	AFR	HG02885	0	0	2	FALSE	haploid	TRUE	unrelated
HG02887	0	HG02887.LILRA7.tsv	0	0	1	GWD	AFR	HG02887	0	0	1	FALSE	haploid	TRUE	unrelated
HG02888	0	HG02888.LILRA7.tsv	0	0	1	GWD	AFR	HG02888	0	0	2	FALSE	haploid	TRUE	unrelated
HG02890	0	HG02890.LILRA7.tsv	0	0	1	GWD	AFR	HG02890	0	0	1	FALSE	haploid	TRUE	unrelated
HG02891	0	HG02891.LILRA7.tsv	0	0	1	GWD	AFR	HG02891	0	0	2	FALSE	haploid	TRUE	unrelated
HG02895	0	HG02895.LILRA7.tsv	0	0	1	GWD	AFR	HG02895	0	0	1	FALSE	haploid	TRUE	unrelated
HG02896	0	HG02896.LILRA7.tsv	0	0	1	GWD	AFR	HG02896	0	0	2	FALSE	haploid	TRUE	unrelated
HG02922	0	HG02922.LILRA7.tsv	0	0	1	ESN	AFR	HG02922	0	0	2	FALSE	haploid	TRUE	unrelated
HG02923	0	HG02923.LILRA7.tsv	0	0	1	ESN	AFR	HG02923	0	0	1	FALSE	haploid	TRUE	unrelated
HG02938	0	HG02938.LILRA7.tsv	0	0	1	ESN	AFR	HG02938	0	0	1	FALSE	haploid	TRUE	unrelated
HG02941	0	HG02941.LILRA7.tsv	0	0	1	ESN	AFR	HG02941	0	0	1	FALSE	haploid	TRUE	unrelated
HG02943	0	HG02943.LILRA7.tsv	0	0	1	ESN	AFR	HG02943	0	0	2	FALSE	haploid	TRUE	unrelated
HG02944	0	HG02944.LILRA7.tsv	0	0	1	ESN	AFR	HG02944	0	0	1	FALSE	haploid	TRUE	unrelated
HG02946	0	HG02946.LILRA7.tsv	0	0	1	ESN	AFR	HG02946	0	0	2	FALSE	haploid	TRUE	unrelated
HG02947	0	HG02947.LILRA7.tsv	0	0	1	ESN	AFR	HG02947	0	0	1	FALSE	haploid	TRUE	unrelated
HG02952	0	HG02952.LILRA7.tsv	0	0	1	ESN	AFR	HG02952	0	0	2	FALSE	haploid	TRUE	unrelated
HG02953	0	HG02953.LILRA7.tsv	0	0	1	ESN	AFR	HG02953	0	0	1	FALSE	haploid	TRUE	unrelated
HG02968	0	HG02968.LILRA7.tsv	0	0	1	ESN	AFR	HG02968	0	0	1	FALSE	haploid	TRUE	unrelated
HG02970	0	HG02970.LILRA7.tsv	0	0	1	ESN	AFR	HG02970	0	0	2	FALSE	haploid	TRUE	unrelated
HG02971	0	HG02971.LILRA7.tsv	0	0	1	ESN	AFR	HG02971	0	0	1	FALSE	haploid	TRUE	unrelated
HG02973	0	HG02973.LILRA7.tsv	0	0	1	ESN	AFR	HG02973	0	0	1	FALSE	haploid	TRUE	unrelated
HG02974	0	HG02974.LILRA7.tsv	0	0	1	ESN	AFR	HG02974	0	0	2	FALSE	haploid	TRUE	unrelated
HG02976	0	HG02976.LILRA7.tsv	0	0	1	ESN	AFR	HG02976	0	0	2	FALSE	haploid	TRUE	unrelated
HG02977	0	HG02977.LILRA7.tsv	0	0	1	ESN	AFR	HG02977	0	0	1	FALSE	haploid	TRUE	unrelated
HG02979	0	HG02979.LILRA7.tsv	0	0	1	ESN	AFR	HG02979	0	0	2	FALSE	haploid	TRUE	unrelated
HG02981	0	HG02981.LILRA7.tsv	0	0	1	ESN	AFR	HG02981	0	0	1	FALSE	haploid	TRUE	unrelated
HG02982	0	HG02982.LILRA7.tsv	0	0	1	GWD	AFR	HG02982	0	0	1	FALSE	haploid	TRUE	unrelated
HG02983	0	HG02983.LILRA7.tsv	0	0	1	GWD	AFR	HG02983	0	0	2	FALSE	haploid	TRUE	unrelated
HG03006	291	HG03006.LILRA7.tsv	5.67675	1	0.999939	BEB	SAS	HG03006	0	0	1	FALSE	haploid	TRUE	unrelated
HG03007	0	HG03007.LILRA7.tsv	0	0	1	BEB	SAS	HG03007	0	0	2	FALSE	haploid	TRUE	unrelated
HG03009	0	HG03009.LILRA7.tsv	0	0	1	BEB	SAS	HG03009	0	0	1	FALSE	haploid	TRUE	unrelated
HG03012	0	HG03012.LILRA7.tsv	0	0	1	BEB	SAS	HG03012	0	0	1	FALSE	haploid	TRUE	unrelated
HG03015	0	HG03015.LILRA7.tsv	0	0	1	PJL	SAS	HG03015	0	0	1	FALSE	haploid	TRUE	unrelated
HG03016	0	HG03016.LILRA7.tsv	0	0	1	PJL	SAS	HG03016	0	0	2	FALSE	haploid	TRUE	unrelated
HG03018	0	HG03018.LILRA7.tsv	0	0	1	PJL	SAS	HG03018	0	0	1	FALSE	haploid	TRUE	unrelated
HG03019	0	HG03019.LILRA7.tsv	0	0	1	PJL	SAS	HG03019	0	0	2	FALSE	haploid	TRUE	unrelated
HG03021	0	HG03021.LILRA7.tsv	0	0	1	PJL	SAS	HG03021	0	0	1	FALSE	haploid	TRUE	unrelated
HG03022	0	HG03022.LILRA7.tsv	0	0	1	PJL	SAS	HG03022	0	0	2	FALSE	haploid	TRUE	unrelated
HG03024	0	HG03024.LILRA7.tsv	0	0	1	GWD	AFR	HG03024	0	0	1	FALSE	haploid	TRUE	unrelated
HG03025	0	HG03025.LILRA7.tsv	0	0	1	GWD	AFR	HG03025	0	0	2	FALSE	haploid	TRUE	unrelated
HG03027	0	HG03027.LILRA7.tsv	0	0	1	GWD	AFR	HG03027	0	0	1	FALSE	haploid	TRUE	unrelated
HG03028	0	HG03028.LILRA7.tsv	0	0	1	GWD	AFR	HG03028	0	0	2	FALSE	haploid	TRUE	unrelated
HG03039	0	HG03039.LILRA7.tsv	0	0	1	GWD	AFR	HG03039	0	0	1	FALSE	haploid	TRUE	unrelated
HG03040	0	HG03040.LILRA7.tsv	0	0	1	GWD	AFR	HG03040	0	0	2	FALSE	haploid	TRUE	unrelated
HG03045	0	HG03045.LILRA7.tsv	0	0	1	GWD	AFR	HG03045	0	0	1	FALSE	haploid	TRUE	unrelated
HG03046	0	HG03046.LILRA7.tsv	0	0	1	GWD	AFR	HG03046	0	0	2	FALSE	haploid	TRUE	unrelated
HG03048	0	HG03048.LILRA7.tsv	0	0	1	GWD	AFR	HG03048	0	0	1	FALSE	haploid	TRUE	unrelated
HG03049	0	HG03049.LILRA7.tsv	0	0	1	GWD	AFR	HG03049	0	0	2	FALSE	haploid	TRUE	unrelated
HG03052	0	HG03052.LILRA7.tsv	0	0	1	MSL	AFR	HG03052	0	0	2	FALSE	haploid	TRUE	unrelated
HG03054	0	HG03054.LILRA7.tsv	0	0	1	MSL	AFR	HG03054	0	0	1	FALSE	haploid	TRUE	unrelated
HG03055	0	HG03055.LILRA7.tsv	0	0	1	MSL	AFR	HG03055	0	0	2	FALSE	haploid	TRUE	unrelated
HG03057	0	HG03057.LILRA7.tsv	0	0	1	MSL	AFR	HG03057	0	0	1	FALSE	haploid	TRUE	unrelated
HG03058	0	HG03058.LILRA7.tsv	0	0	1	MSL	AFR	HG03058	0	0	2	FALSE	haploid	TRUE	unrelated
HG03060	0	HG03060.LILRA7.tsv	0	0	1	MSL	AFR	HG03060	0	0	1	FALSE	haploid	TRUE	unrelated
HG03061	0	HG03061.LILRA7.tsv	0	0	1	MSL	AFR	HG03061	0	0	2	FALSE	haploid	TRUE	unrelated
HG03063	0	HG03063.LILRA7.tsv	0	0	1	MSL	AFR	HG03063	0	0	1	FALSE	haploid	TRUE	unrelated
HG03064	0	HG03064.LILRA7.tsv	0	0	1	MSL	AFR	HG03064	0	0	2	FALSE	haploid	TRUE	unrelated
HG03066	0	HG03066.LILRA7.tsv	0	0	1	MSL	AFR	HG03066	0	0	1	FALSE	haploid	TRUE	unrelated
HG03069	0	HG03069.LILRA7.tsv	0	0	1	MSL	AFR	HG03069	0	0	1	FALSE	haploid	TRUE	unrelated
HG03072	0	HG03072.LILRA7.tsv	0	0	1	MSL	AFR	HG03072	0	0	1	FALSE	haploid	TRUE	unrelated
HG03073	0	HG03073.LILRA7.tsv	0	0	1	MSL	AFR	HG03073	0	0	2	FALSE	haploid	TRUE	unrelated
HG03074	0	HG03074.LILRA7.tsv	0	0	1	MSL	AFR	HG03074	0	0	1	FALSE	haploid	TRUE	unrelated
HG03077	0	HG03077.LILRA7.tsv	0	0	1	MSL	AFR	HG03077	0	0	1	FALSE	haploid	TRUE	unrelated
HG03078	0	HG03078.LILRA7.tsv	0	0	1	MSL	AFR	HG03078	0	0	1	FALSE	haploid	TRUE	unrelated
HG03079	0	HG03079.LILRA7.tsv	0	0	1	MSL	AFR	HG03079	0	0	2	FALSE	haploid	TRUE	unrelated
HG03081	0	HG03081.LILRA7.tsv	0	0	1	MSL	AFR	HG03081	0	0	1	FALSE	haploid	TRUE	unrelated
HG03082	0	HG03082.LILRA7.tsv	0	0	1	MSL	AFR	HG03082	0	0	2	FALSE	haploid	TRUE	unrelated
HG03084	0	HG03084.LILRA7.tsv	0	0	1	MSL	AFR	HG03084	0	0	1	FALSE	haploid	TRUE	unrelated
HG03085	0	HG03085.LILRA7.tsv	0	0	1	MSL	AFR	HG03085	0	0	2	FALSE	haploid	TRUE	unrelated
HG03086	0	HG03086.LILRA7.tsv	0	0	1	MSL	AFR	HG03086	0	0	2	FALSE	haploid	TRUE	unrelated
HG03088	0	HG03088.LILRA7.tsv	0	0	1	MSL	AFR	HG03088	0	0	2	FALSE	haploid	TRUE	unrelated
HG03091	0	HG03091.LILRA7.tsv	0	0	1	MSL	AFR	HG03091	0	0	2	FALSE	haploid	TRUE	unrelated
HG03095	0	HG03095.LILRA7.tsv	0	0	1	MSL	AFR	HG03095	0	0	2	FALSE	haploid	TRUE	unrelated
HG03096	0	HG03096.LILRA7.tsv	0	0	1	MSL	AFR	HG03096	0	0	1	FALSE	haploid	TRUE	unrelated
HG03097	0	HG03097.LILRA7.tsv	0	0	1	MSL	AFR	HG03097	0	0	2	FALSE	haploid	TRUE	unrelated
HG03099	0	HG03099.LILRA7.tsv	0	0	1	ESN	AFR	HG03099	0	0	2	FALSE	haploid	TRUE	unrelated
HG03100	0	HG03100.LILRA7.tsv	0	0	1	ESN	AFR	HG03100	0	0	1	FALSE	haploid	TRUE	unrelated
HG03103	0	HG03103.LILRA7.tsv	0	0	1	ESN	AFR	HG03103	0	0	1	FALSE	haploid	TRUE	unrelated
HG03105	0	HG03105.LILRA7.tsv	0	0	1	ESN	AFR	HG03105	0	0	2	FALSE	haploid	TRUE	unrelated
HG03108	0	HG03108.LILRA7.tsv	0	0	1	ESN	AFR	HG03108	0	0	2	FALSE	haploid	TRUE	unrelated
HG03109	0	HG03109.LILRA7.tsv	0	0	1	ESN	AFR	HG03109	0	0	1	FALSE	haploid	TRUE	unrelated
HG03111	0	HG03111.LILRA7.tsv	0	0	1	ESN	AFR	HG03111	0	0	2	FALSE	haploid	TRUE	unrelated
HG03112	0	HG03112.LILRA7.tsv	0	0	1	ESN	AFR	HG03112	0	0	1	FALSE	haploid	TRUE	unrelated
HG03114	0	HG03114.LILRA7.tsv	0	0	1	ESN	AFR	HG03114	0	0	2	FALSE	haploid	TRUE	unrelated
HG03115	0	HG03115.LILRA7.tsv	0	0	1	ESN	AFR	HG03115	0	0	1	FALSE	haploid	TRUE	unrelated
HG03117	0	HG03117.LILRA7.tsv	0	0	1	ESN	AFR	HG03117	0	0	2	FALSE	haploid	TRUE	unrelated
HG03118	0	HG03118.LILRA7.tsv	0	0	1	ESN	AFR	HG03118	0	0	1	FALSE	haploid	TRUE	unrelated
HG03120	0	HG03120.LILRA7.tsv	0	0	1	ESN	AFR	HG03120	0	0	1	FALSE	haploid	TRUE	unrelated
HG03121	0	HG03121.LILRA7.tsv	0	0	1	ESN	AFR	HG03121	0	0	2	FALSE	haploid	TRUE	unrelated
HG03123	0	HG03123.LILRA7.tsv	0	0	1	ESN	AFR	HG03123	0	0	2	FALSE	haploid	TRUE	unrelated
HG03124	0	HG03124.LILRA7.tsv	0	0	1	ESN	AFR	HG03124	0	0	1	FALSE	haploid	TRUE	unrelated
HG03126	0	HG03126.LILRA7.tsv	0	0	1	ESN	AFR	HG03126	0	0	2	FALSE	haploid	TRUE	unrelated
HG03127	0	HG03127.LILRA7.tsv	0	0	1	ESN	AFR	HG03127	0	0	1	FALSE	haploid	TRUE	unrelated
HG03129	0	HG03129.LILRA7.tsv	0	0	1	ESN	AFR	HG03129	0	0	2	FALSE	haploid	TRUE	unrelated
HG03130	0	HG03130.LILRA7.tsv	0	0	1	ESN	AFR	HG03130	0	0	1	FALSE	haploid	TRUE	unrelated
HG03132	0	HG03132.LILRA7.tsv	0	0	1	ESN	AFR	HG03132	0	0	2	FALSE	haploid	TRUE	unrelated
HG03133	0	HG03133.LILRA7.tsv	0	0	1	ESN	AFR	HG03133	0	0	1	FALSE	haploid	TRUE	unrelated
HG03135	0	HG03135.LILRA7.tsv	0	0	1	ESN	AFR	HG03135	0	0	2	FALSE	haploid	TRUE	unrelated
HG03136	0	HG03136.LILRA7.tsv	0	0	1	ESN	AFR	HG03136	0	0	1	FALSE	haploid	TRUE	unrelated
HG03139	0	HG03139.LILRA7.tsv	0	0	1	ESN	AFR	HG03139	0	0	1	FALSE	haploid	TRUE	unrelated
HG03157	0	HG03157.LILRA7.tsv	0	0	1	ESN	AFR	HG03157	0	0	1	FALSE	haploid	TRUE	unrelated
HG03159	0	HG03159.LILRA7.tsv	0	0	1	ESN	AFR	HG03159	0	0	2	FALSE	haploid	TRUE	unrelated
HG03160	0	HG03160.LILRA7.tsv	0	0	1	ESN	AFR	HG03160	0	0	1	FALSE	haploid	TRUE	unrelated
HG03162	0	HG03162.LILRA7.tsv	0	0	1	ESN	AFR	HG03162	0	0	2	FALSE	haploid	TRUE	unrelated
HG03163	0	HG03163.LILRA7.tsv	0	0	1	ESN	AFR	HG03163	0	0	1	FALSE	haploid	TRUE	unrelated
HG03166	0	HG03166.LILRA7.tsv	0	0	1	ESN	AFR	HG03166	0	0	1	FALSE	haploid	TRUE	unrelated
HG03168	0	HG03168.LILRA7.tsv	0	0	1	ESN	AFR	HG03168	0	0	2	FALSE	haploid	TRUE	unrelated
HG03169	0	HG03169.LILRA7.tsv	0	0	1	ESN	AFR	HG03169	0	0	1	FALSE	haploid	TRUE	unrelated
HG03172	0	HG03172.LILRA7.tsv	0	0	1	ESN	AFR	HG03172	0	0	1	FALSE	haploid	TRUE	unrelated
HG03175	0	HG03175.LILRA7.tsv	0	0	1	ESN	AFR	HG03175	0	0	1	FALSE	haploid	TRUE	unrelated
HG03189	0	HG03189.LILRA7.tsv	0	0	1	ESN	AFR	HG03189	0	0	2	FALSE	haploid	TRUE	unrelated
HG03190	0	HG03190.LILRA7.tsv	0	0	1	ESN	AFR	HG03190	0	0	1	FALSE	haploid	TRUE	unrelated
HG03193	0	HG03193.LILRA7.tsv	0	0	1	ESN	AFR	HG03193	0	0	1	FALSE	haploid	TRUE	unrelated
HG03195	0	HG03195.LILRA7.tsv	0	0	1	ESN	AFR	HG03195	0	0	2	FALSE	haploid	TRUE	unrelated
HG03196	0	HG03196.LILRA7.tsv	0	0	1	ESN	AFR	HG03196	0	0	1	FALSE	haploid	TRUE	unrelated
HG03198	0	HG03198.LILRA7.tsv	0	0	1	ESN	AFR	HG03198	0	0	2	FALSE	haploid	TRUE	unrelated
HG03199	0	HG03199.LILRA7.tsv	0	0	1	ESN	AFR	HG03199	0	0	1	FALSE	haploid	TRUE	unrelated
HG03202	0	HG03202.LILRA7.tsv	0	0	1	ESN	AFR	HG03202	0	0	1	FALSE	haploid	TRUE	unrelated
HG03209	0	HG03209.LILRA7.tsv	0	0	1	MSL	AFR	HG03209	0	0	1	FALSE	haploid	TRUE	unrelated
HG03212	0	HG03212.LILRA7.tsv	0	0	1	MSL	AFR	HG03212	0	0	2	FALSE	haploid	TRUE	unrelated
HG03224	0	HG03224.LILRA7.tsv	0	0	1	MSL	AFR	HG03224	0	0	1	FALSE	haploid	TRUE	unrelated
HG03225	0	HG03225.LILRA7.tsv	0	0	1	MSL	AFR	HG03225	0	0	1	FALSE	haploid	TRUE	unrelated
HG03228	0	HG03228.LILRA7.tsv	0	0	1	PJL	SAS	HG03228	0	0	1	FALSE	haploid	TRUE	unrelated
HG03229	0	HG03229.LILRA7.tsv	0	0	1	PJL	SAS	HG03229	0	0	2	FALSE	haploid	TRUE	unrelated
HG03234	0	HG03234.LILRA7.tsv	0	0	1	PJL	SAS	HG03234	0	0	1	FALSE	haploid	TRUE	unrelated
HG03235	0	HG03235.LILRA7.tsv	0	0	1	PJL	SAS	HG03235	0	0	2	FALSE	haploid	TRUE	unrelated
HG03237	0	HG03237.LILRA7.tsv	0	0	1	PJL	SAS	HG03237	0	0	1	FALSE	haploid	TRUE	unrelated
HG03238	0	HG03238.LILRA7.tsv	0	0	1	PJL	SAS	HG03238	0	0	2	FALSE	haploid	TRUE	unrelated
HG03240	0	HG03240.LILRA7.tsv	0	0	1	GWD	AFR	HG03240	0	0	1	FALSE	haploid	TRUE	unrelated
HG03241	0	HG03241.LILRA7.tsv	0	0	1	GWD	AFR	HG03241	0	0	2	FALSE	haploid	TRUE	unrelated
HG03246	0	HG03246.LILRA7.tsv	0	0	1	GWD	AFR	HG03246	0	0	1	FALSE	haploid	TRUE	unrelated
HG03247	0	HG03247.LILRA7.tsv	0	0	1	GWD	AFR	HG03247	0	0	2	FALSE	haploid	TRUE	unrelated
HG03258	0	HG03258.LILRA7.tsv	0	0	1	GWD	AFR	HG03258	0	0	1	FALSE	haploid	TRUE	unrelated
HG03259	0	HG03259.LILRA7.tsv	0	0	1	GWD	AFR	HG03259	0	0	2	FALSE	haploid	TRUE	unrelated
HG03265	0	HG03265.LILRA7.tsv	0	0	1	ESN	AFR	HG03265	0	0	1	FALSE	haploid	TRUE	unrelated
HG03267	0	HG03267.LILRA7.tsv	0	0	1	ESN	AFR	HG03267	0	0	2	FALSE	haploid	TRUE	unrelated
HG03268	0	HG03268.LILRA7.tsv	0	0	1	ESN	AFR	HG03268	0	0	1	FALSE	haploid	TRUE	unrelated
HG03270	0	HG03270.LILRA7.tsv	0	0	1	ESN	AFR	HG03270	0	0	2	FALSE	haploid	TRUE	unrelated
HG03271	0	HG03271.LILRA7.tsv	0	0	1	ESN	AFR	HG03271	0	0	1	FALSE	haploid	TRUE	unrelated
HG03279	0	HG03279.LILRA7.tsv	0	0	1	ESN	AFR	HG03279	0	0	2	FALSE	haploid	TRUE	unrelated
HG03280	0	HG03280.LILRA7.tsv	0	0	1	ESN	AFR	HG03280	0	0	1	FALSE	haploid	TRUE	unrelated
HG03291	0	HG03291.LILRA7.tsv	0	0	1	ESN	AFR	HG03291	0	0	2	FALSE	haploid	TRUE	unrelated
HG03294	0	HG03294.LILRA7.tsv	0	0	1	ESN	AFR	HG03294	0	0	2	FALSE	haploid	TRUE	unrelated
HG03295	0	HG03295.LILRA7.tsv	0	0	1	ESN	AFR	HG03295	0	0	1	FALSE	haploid	TRUE	unrelated
HG03297	0	HG03297.LILRA7.tsv	0	0	1	ESN	AFR	HG03297	0	0	2	FALSE	haploid	TRUE	unrelated
HG03298	0	HG03298.LILRA7.tsv	0	0	1	ESN	AFR	HG03298	0	0	1	FALSE	haploid	TRUE	unrelated
HG03300	0	HG03300.LILRA7.tsv	0	0	1	ESN	AFR	HG03300	0	0	2	FALSE	haploid	TRUE	unrelated
HG03301	0	HG03301.LILRA7.tsv	0	0	1	ESN	AFR	HG03301	0	0	1	FALSE	haploid	TRUE	unrelated
HG03303	0	HG03303.LILRA7.tsv	0	0	1	ESN	AFR	HG03303	0	0	2	FALSE	haploid	TRUE	unrelated
HG03304	0	HG03304.LILRA7.tsv	0	0	1	ESN	AFR	HG03304	0	0	1	FALSE	haploid	TRUE	unrelated
HG03311	0	HG03311.LILRA7.tsv	0	0	1	ESN	AFR	HG03311	0	0	1	FALSE	haploid	TRUE	unrelated
HG03313	0	HG03313.LILRA7.tsv	0	0	1	ESN	AFR	HG03313	0	0	1	FALSE	haploid	TRUE	unrelated
HG03342	0	HG03342.LILRA7.tsv	0	0	1	ESN	AFR	HG03342	0	0	2	FALSE	haploid	TRUE	unrelated
HG03343	0	HG03343.LILRA7.tsv	0	0	1	ESN	AFR	HG03343	0	0	1	FALSE	haploid	TRUE	unrelated
HG03351	0	HG03351.LILRA7.tsv	0	0	1	ESN	AFR	HG03351	0	0	2	FALSE	haploid	TRUE	unrelated
HG03352	0	HG03352.LILRA7.tsv	0	0	1	ESN	AFR	HG03352	0	0	1	FALSE	haploid	TRUE	unrelated
HG03354	0	HG03354.LILRA7.tsv	0	0	1	ESN	AFR	HG03354	0	0	2	FALSE	haploid	TRUE	unrelated
HG03363	0	HG03363.LILRA7.tsv	0	0	1	ESN	AFR	HG03363	0	0	2	FALSE	haploid	TRUE	unrelated
HG03366	0	HG03366.LILRA7.tsv	0	0	1	ESN	AFR	HG03366	0	0	2	FALSE	haploid	TRUE	unrelated
HG03367	0	HG03367.LILRA7.tsv	0	0	1	ESN	AFR	HG03367	0	0	1	FALSE	haploid	TRUE	unrelated
HG03369	0	HG03369.LILRA7.tsv	0	0	1	ESN	AFR	HG03369	0	0	2	FALSE	haploid	TRUE	unrelated
HG03370	0	HG03370.LILRA7.tsv	0	0	1	ESN	AFR	HG03370	0	0	1	FALSE	haploid	TRUE	unrelated
HG03372	0	HG03372.LILRA7.tsv	0	0	1	ESN	AFR	HG03372	0	0	2	FALSE	haploid	TRUE	unrelated
HG03376	0	HG03376.LILRA7.tsv	0	0	1	MSL	AFR	HG03376	0	0	1	FALSE	haploid	TRUE	unrelated
HG03378	0	HG03378.LILRA7.tsv	0	0	1	MSL	AFR	HG03378	0	0	2	FALSE	haploid	TRUE	unrelated
HG03380	0	HG03380.LILRA7.tsv	0	0	1	MSL	AFR	HG03380	0	0	2	FALSE	haploid	TRUE	unrelated
HG03382	0	HG03382.LILRA7.tsv	0	0	1	MSL	AFR	HG03382	0	0	1	FALSE	haploid	TRUE	unrelated
HG03385	0	HG03385.LILRA7.tsv	0	0	1	MSL	AFR	HG03385	0	0	1	FALSE	haploid	TRUE	unrelated
HG03388	0	HG03388.LILRA7.tsv	0	0	1	MSL	AFR	HG03388	0	0	1	FALSE	haploid	TRUE	unrelated
HG03391	0	HG03391.LILRA7.tsv	0	0	1	MSL	AFR	HG03391	0	0	1	FALSE	haploid	TRUE	unrelated
HG03394	0	HG03394.LILRA7.tsv	0	0	1	MSL	AFR	HG03394	0	0	1	FALSE	haploid	TRUE	unrelated
HG03397	0	HG03397.LILRA7.tsv	0	0	1	MSL	AFR	HG03397	0	0	1	FALSE	haploid	TRUE	unrelated
HG03401	0	HG03401.LILRA7.tsv	0	0	1	MSL	AFR	HG03401	0	0	2	FALSE	haploid	TRUE	unrelated
HG03410	0	HG03410.LILRA7.tsv	0	0	1	MSL	AFR	HG03410	0	0	2	FALSE	haploid	TRUE	unrelated
HG03419	0	HG03419.LILRA7.tsv	0	0	1	MSL	AFR	HG03419	0	0	2	FALSE	haploid	TRUE	unrelated
HG03428	0	HG03428.LILRA7.tsv	0	0	1	MSL	AFR	HG03428	0	0	2	FALSE	haploid	TRUE	unrelated
HG03432	0	HG03432.LILRA7.tsv	0	0	1	MSL	AFR	HG03432	0	0	1	FALSE	haploid	TRUE	unrelated
HG03433	0	HG03433.LILRA7.tsv	0	0	1	MSL	AFR	HG03433	0	0	1	FALSE	haploid	TRUE	unrelated
HG03436	0	HG03436.LILRA7.tsv	0	0	1	MSL	AFR	HG03436	0	0	1	FALSE	haploid	TRUE	unrelated
HG03437	0	HG03437.LILRA7.tsv	0	0	1	MSL	AFR	HG03437	0	0	2	FALSE	haploid	TRUE	unrelated
HG03439	0	HG03439.LILRA7.tsv	0	0	1	MSL	AFR	HG03439	0	0	1	FALSE	haploid	TRUE	unrelated
HG03442	0	HG03442.LILRA7.tsv	0	0	1	MSL	AFR	HG03442	0	0	1	FALSE	haploid	TRUE	unrelated
HG03445	0	HG03445.LILRA7.tsv	0	0	1	MSL	AFR	HG03445	0	0	1	FALSE	haploid	TRUE	unrelated
HG03446	0	HG03446.LILRA7.tsv	0	0	1	MSL	AFR	HG03446	0	0	2	FALSE	haploid	TRUE	unrelated
HG03449	0	HG03449.LILRA7.tsv	0	0	1	MSL	AFR	HG03449	0	0	2	FALSE	haploid	TRUE	unrelated
HG03451	0	HG03451.LILRA7.tsv	0	0	1	MSL	AFR	HG03451	0	0	1	FALSE	haploid	TRUE	unrelated
HG03452	0	HG03452.LILRA7.tsv	0	0	1	MSL	AFR	HG03452	0	0	2	FALSE	haploid	TRUE	unrelated
HG03455	0	HG03455.LILRA7.tsv	0	0	1	MSL	AFR	HG03455	0	0	2	FALSE	haploid	TRUE	unrelated
HG03457	0	HG03457.LILRA7.tsv	0	0	1	MSL	AFR	HG03457	0	0	1	FALSE	haploid	TRUE	unrelated
HG03458	0	HG03458.LILRA7.tsv	0	0	1	MSL	AFR	HG03458	0	0	2	FALSE	haploid	TRUE	unrelated
HG03460	0	HG03460.LILRA7.tsv	0	0	1	MSL	AFR	HG03460	0	0	1	FALSE	haploid	TRUE	unrelated
HG03461	0	HG03461.LILRA7.tsv	0	0	1	MSL	AFR	HG03461	0	0	2	FALSE	haploid	TRUE	unrelated
HG03464	0	HG03464.LILRA7.tsv	0	0	1	MSL	AFR	HG03464	0	0	2	FALSE	haploid	TRUE	unrelated
HG03469	0	HG03469.LILRA7.tsv	0	0	1	MSL	AFR	HG03469	0	0	1	FALSE	haploid	TRUE	unrelated
HG03470	0	HG03470.LILRA7.tsv	0	0	1	MSL	AFR	HG03470	0	0	2	FALSE	haploid	TRUE	unrelated
HG03472	0	HG03472.LILRA7.tsv	0	0	1	MSL	AFR	HG03472	0	0	1	FALSE	haploid	TRUE	unrelated
HG03473	0	HG03473.LILRA7.tsv	0	0	1	MSL	AFR	HG03473	0	0	2	FALSE	haploid	TRUE	unrelated
HG03476	0	HG03476.LILRA7.tsv	0	0	1	MSL	AFR	HG03476	0	0	2	FALSE	haploid	TRUE	unrelated
HG03478	0	HG03478.LILRA7.tsv	0	0	1	MSL	AFR	HG03478	0	0	1	FALSE	haploid	TRUE	unrelated
HG03479	0	HG03479.LILRA7.tsv	0	0	1	MSL	AFR	HG03479	0	0	2	FALSE	haploid	TRUE	unrelated
HG03484	0	HG03484.LILRA7.tsv	0	0	1	MSL	AFR	HG03484	0	0	1	FALSE	haploid	TRUE	unrelated
HG03485	0	HG03485.LILRA7.tsv	0	0	1	MSL	AFR	HG03485	0	0	2	FALSE	haploid	TRUE	unrelated
HG03488	0	HG03488.LILRA7.tsv	0	0	1	PJL	SAS	HG03488	0	0	2	FALSE	haploid	TRUE	unrelated
HG03490	0	HG03490.LILRA7.tsv	0	0	1	PJL	SAS	HG03490	0	0	1	FALSE	haploid	TRUE	unrelated
HG03491	0	HG03491.LILRA7.tsv	0	0	1	PJL	SAS	HG03491	0	0	2	FALSE	haploid	TRUE	unrelated
HG03499	0	HG03499.LILRA7.tsv	0	0	1	ESN	AFR	HG03499	0	0	2	FALSE	haploid	TRUE	unrelated
HG03511	0	HG03511.LILRA7.tsv	0	0	1	ESN	AFR	HG03511	0	0	2	FALSE	haploid	TRUE	unrelated
HG03514	0	HG03514.LILRA7.tsv	0	0	1	ESN	AFR	HG03514	0	0	2	FALSE	haploid	TRUE	unrelated
HG03515	0	HG03515.LILRA7.tsv	0	0	1	ESN	AFR	HG03515	0	0	1	FALSE	haploid	TRUE	unrelated
HG03517	0	HG03517.LILRA7.tsv	0	0	1	ESN	AFR	HG03517	0	0	2	FALSE	haploid	TRUE	unrelated
HG03518	0	HG03518.LILRA7.tsv	0	0	1	ESN	AFR	HG03518	0	0	1	FALSE	haploid	TRUE	unrelated
HG03520	0	HG03520.LILRA7.tsv	0	0	1	ESN	AFR	HG03520	0	0	2	FALSE	haploid	TRUE	unrelated
HG03521	0	HG03521.LILRA7.tsv	0	0	1	ESN	AFR	HG03521	0	0	1	FALSE	haploid	TRUE	unrelated
HG03538	0	HG03538.LILRA7.tsv	0	0	1	GWD	AFR	HG03538	0	0	1	FALSE	haploid	TRUE	unrelated
HG03539	0	HG03539.LILRA7.tsv	0	0	1	GWD	AFR	HG03539	0	0	2	FALSE	haploid	TRUE	unrelated
HG03547	0	HG03547.LILRA7.tsv	0	0	1	MSL	AFR	HG03547	0	0	1	FALSE	haploid	TRUE	unrelated
HG03548	0	HG03548.LILRA7.tsv	0	0	1	MSL	AFR	HG03548	0	0	2	FALSE	haploid	TRUE	unrelated
HG03556	0	HG03556.LILRA7.tsv	0	0	1	MSL	AFR	HG03556	0	0	1	FALSE	haploid	TRUE	unrelated
HG03557	0	HG03557.LILRA7.tsv	0	0	1	MSL	AFR	HG03557	0	0	2	FALSE	haploid	TRUE	unrelated
HG03558	0	HG03558.LILRA7.tsv	0	0	1	MSL	AFR	HG03558	0	0	2	FALSE	haploid	TRUE	unrelated
HG03559	0	HG03559.LILRA7.tsv	0	0	1	MSL	AFR	HG03559	0	0	1	FALSE	haploid	TRUE	unrelated
HG03563	0	HG03563.LILRA7.tsv	0	0	1	MSL	AFR	HG03563	0	0	2	FALSE	haploid	TRUE	unrelated
HG03565	0	HG03565.LILRA7.tsv	0	0	1	MSL	AFR	HG03565	0	0	1	FALSE	haploid	TRUE	unrelated
HG03567	0	HG03567.LILRA7.tsv	0	0	1	MSL	AFR	HG03567	0	0	2	FALSE	haploid	TRUE	unrelated
HG03571	0	HG03571.LILRA7.tsv	0	0	1	MSL	AFR	HG03571	0	0	1	FALSE	haploid	TRUE	unrelated
HG03572	0	HG03572.LILRA7.tsv	0	0	1	MSL	AFR	HG03572	0	0	2	FALSE	haploid	TRUE	unrelated
HG03575	0	HG03575.LILRA7.tsv	0	0	1	MSL	AFR	HG03575	0	0	2	FALSE	haploid	TRUE	unrelated
HG03577	0	HG03577.LILRA7.tsv	0	0	1	MSL	AFR	HG03577	0	0	1	FALSE	haploid	TRUE	unrelated
HG03578	0	HG03578.LILRA7.tsv	0	0	1	MSL	AFR	HG03578	0	0	2	FALSE	haploid	TRUE	unrelated
HG03583	0	HG03583.LILRA7.tsv	0	0	1	MSL	AFR	HG03583	0	0	2	FALSE	haploid	TRUE	unrelated
HG03585	0	HG03585.LILRA7.tsv	0	0	1	BEB	SAS	HG03585	0	0	1	FALSE	haploid	TRUE	unrelated
HG03589	221	HG03589.LILRA7.tsv	5.40268	1	0.999999	BEB	SAS	HG03589	0	0	2	FALSE	haploid	TRUE	unrelated
HG03593	0	HG03593.LILRA7.tsv	0	0	1	BEB	SAS	HG03593	0	0	1	FALSE	haploid	TRUE	unrelated
HG03594	0	HG03594.LILRA7.tsv	0	0	1	BEB	SAS	HG03594	0	0	1	FALSE	haploid	TRUE	unrelated
HG03595	264	HG03595.LILRA7.tsv	5.57973	1	0.999989	BEB	SAS	HG03595	0	0	2	FALSE	haploid	TRUE	unrelated
HG03598	0	HG03598.LILRA7.tsv	0	0	1	BEB	SAS	HG03598	0	0	2	FALSE	haploid	TRUE	unrelated
HG03600	0	HG03600.LILRA7.tsv	0	0	1	BEB	SAS	HG03600	0	0	1	FALSE	haploid	TRUE	unrelated
HG03603	0	HG03603.LILRA7.tsv	0	0	1	BEB	SAS	HG03603	0	0	1	FALSE	haploid	TRUE	unrelated
HG03604	0	HG03604.LILRA7.tsv	0	0	1	BEB	SAS	HG03604	0	0	2	FALSE	haploid	TRUE	unrelated
HG03607	0	HG03607.LILRA7.tsv	0	0	1	BEB	SAS	HG03607	0	0	2	FALSE	haploid	TRUE	unrelated
HG03611	0	HG03611.LILRA7.tsv	0	0	1	BEB	SAS	HG03611	0	0	2	FALSE	haploid	TRUE	unrelated
HG03615	0	HG03615.LILRA7.tsv	0	0	1	BEB	SAS	HG03615	0	0	1	FALSE	haploid	TRUE	unrelated
HG03616	0	HG03616.LILRA7.tsv	0	0	1	BEB	SAS	HG03616	0	0	2	FALSE	haploid	TRUE	unrelated
HG03619	223	HG03619.LILRA7.tsv	5.41165	1	0.999999	PJL	SAS	HG03619	0	0	2	FALSE	haploid	TRUE	unrelated
HG03624	0	HG03624.LILRA7.tsv	0	0	1	PJL	SAS	HG03624	0	0	1	FALSE	haploid	TRUE	unrelated
HG03625	288	HG03625.LILRA7.tsv	5.66643	1	0.999949	PJL	SAS	HG03625	0	0	2	FALSE	haploid	TRUE	unrelated
HG03629	0	HG03629.LILRA7.tsv	0	0	1	PJL	SAS	HG03629	0	0	1	FALSE	haploid	TRUE	unrelated
HG03631	0	HG03631.LILRA7.tsv	0	0	1	PJL	SAS	HG03631	0	0	2	FALSE	haploid	TRUE	unrelated
HG03634	0	HG03634.LILRA7.tsv	0	0	1	PJL	SAS	HG03634	0	0	2	FALSE	haploid	TRUE	unrelated
HG03636	0	HG03636.LILRA7.tsv	0	0	1	PJL	SAS	HG03636	0	0	1	FALSE	haploid	TRUE	unrelated
HG03640	197	HG03640.LILRA7.tsv	5.28827	1	1	PJL	SAS	HG03640	0	0	2	FALSE	haploid	TRUE	unrelated
HG03642	0	HG03642.LILRA7.tsv	0	0	1	STU	SAS	HG03642	0	0	2	FALSE	haploid	TRUE	unrelated
HG03643	188	HG03643.LILRA7.tsv	5.24175	1	1	STU	SAS	HG03643	0	0	2	FALSE	haploid	TRUE	unrelated
HG03644	0	HG03644.LILRA7.tsv	0	0	1	STU	SAS	HG03644	0	0	1	FALSE	haploid	TRUE	unrelated
HG03645	0	HG03645.LILRA7.tsv	0	0	1	STU	SAS	HG03645	0	0	2	FALSE	haploid	TRUE	unrelated
HG03646	0	HG03646.LILRA7.tsv	0	0	1	STU	SAS	HG03646	0	0	1	FALSE	haploid	TRUE	unrelated
HG03649	0	HG03649.LILRA7.tsv	0	0	1	PJL	SAS	HG03649	0	0	1	FALSE	haploid	TRUE	unrelated
HG03652	0	HG03652.LILRA7.tsv	0	0	1	PJL	SAS	HG03652	0	0	1	FALSE	haploid	TRUE	unrelated
HG03653	210	HG03653.LILRA7.tsv	5.35186	1	1	PJL	SAS	HG03653	0	0	2	FALSE	haploid	TRUE	unrelated
HG03660	0	HG03660.LILRA7.tsv	0	0	1	PJL	SAS	HG03660	0	0	1	FALSE	haploid	TRUE	unrelated
HG03663	225	HG03663.LILRA7.tsv	5.42053	1	0.999999	PJL	SAS	HG03663	0	0	1	FALSE	haploid	TRUE	unrelated
HG03667	267	HG03667.LILRA7.tsv	5.59099	1	0.999986	PJL	SAS	HG03667	0	0	1	FALSE	haploid	TRUE	unrelated
HG03668	0	HG03668.LILRA7.tsv	0	0	1	PJL	SAS	HG03668	0	0	2	FALSE	haploid	TRUE	unrelated
HG03672	0	HG03672.LILRA7.tsv	0	0	1	STU	SAS	HG03672	0	0	1	FALSE	haploid	TRUE	unrelated
HG03673	0	HG03673.LILRA7.tsv	0	0	1	STU	SAS	HG03673	0	0	2	FALSE	haploid	TRUE	unrelated
HG03679	0	HG03679.LILRA7.tsv	0	0	1	STU	SAS	HG03679	0	0	1	FALSE	haploid	TRUE	unrelated
HG03680	193	HG03680.LILRA7.tsv	5.26786	1	1	STU	SAS	HG03680	0	0	1	FALSE	haploid	TRUE	unrelated
HG03681	0	HG03681.LILRA7.tsv	0	0	1	STU	SAS	HG03681	0	0	1	FALSE	haploid	TRUE	unrelated
HG03684	0	HG03684.LILRA7.tsv	0	0	1	STU	SAS	HG03684	0	0	2	FALSE	haploid	TRUE	unrelated
HG03685	0	HG03685.LILRA7.tsv	0	0	1	STU	SAS	HG03685	0	0	1	FALSE	haploid	TRUE	unrelated
HG03686	0	HG03686.LILRA7.tsv	0	0	1	STU	SAS	HG03686	0	0	1	FALSE	haploid	TRUE	unrelated
HG03687	192	HG03687.LILRA7.tsv	5.26269	1	1	STU	SAS	HG03687	0	0	1	FALSE	haploid	TRUE	unrelated
HG03689	0	HG03689.LILRA7.tsv	0	0	1	STU	SAS	HG03689	0	0	2	FALSE	haploid	TRUE	unrelated
HG03690	0	HG03690.LILRA7.tsv	0	0	1	STU	SAS	HG03690	0	0	2	FALSE	haploid	TRUE	unrelated
HG03691	0	HG03691.LILRA7.tsv	0	0	1	STU	SAS	HG03691	0	0	1	FALSE	haploid	TRUE	unrelated
HG03692	0	HG03692.LILRA7.tsv	0	0	1	STU	SAS	HG03692	0	0	2	FALSE	haploid	TRUE	unrelated
HG03693	0	HG03693.LILRA7.tsv	0	0	1	STU	SAS	HG03693	0	0	1	FALSE	haploid	TRUE	unrelated
HG03694	0	HG03694.LILRA7.tsv	0	0	1	STU	SAS	HG03694	0	0	1	FALSE	haploid	TRUE	unrelated
HG03695	0	HG03695.LILRA7.tsv	0	0	1	STU	SAS	HG03695	0	0	1	FALSE	haploid	TRUE	unrelated
HG03696	0	HG03696.LILRA7.tsv	0	0	1	STU	SAS	HG03696	0	0	1	FALSE	haploid	TRUE	unrelated
HG03697	0	HG03697.LILRA7.tsv	0	0	1	STU	SAS	HG03697	0	0	1	FALSE	haploid	TRUE	unrelated
HG03698	226	HG03698.LILRA7.tsv	5.42495	1	0.999999	STU	SAS	HG03698	0	0	2	FALSE	haploid	TRUE	unrelated
HG03702	0	HG03702.LILRA7.tsv	0	0	1	PJL	SAS	HG03702	0	0	1	FALSE	haploid	TRUE	unrelated
HG03703	0	HG03703.LILRA7.tsv	0	0	1	PJL	SAS	HG03703	0	0	2	FALSE	haploid	TRUE	unrelated
HG03705	0	HG03705.LILRA7.tsv	0	0	1	PJL	SAS	HG03705	0	0	1	FALSE	haploid	TRUE	unrelated
HG03706	0	HG03706.LILRA7.tsv	0	0	1	PJL	SAS	HG03706	0	0	2	FALSE	haploid	TRUE	unrelated
HG03708	0	HG03708.LILRA7.tsv	0	0	1	PJL	SAS	HG03708	0	0	1	FALSE	haploid	TRUE	unrelated
HG03709	0	HG03709.LILRA7.tsv	0	0	1	PJL	SAS	HG03709	0	0	2	FALSE	haploid	TRUE	unrelated
HG03711	0	HG03711.LILRA7.tsv	0	0	1	STU	SAS	HG03711	0	0	1	FALSE	haploid	TRUE	unrelated
HG03713	0	HG03713.LILRA7.tsv	0	0	1	ITU	SAS	HG03713	0	0	1	FALSE	haploid	TRUE	unrelated
HG03714	0	HG03714.LILRA7.tsv	0	0	1	ITU	SAS	HG03714	0	0	2	FALSE	haploid	TRUE	unrelated
HG03716	0	HG03716.LILRA7.tsv	0	0	1	ITU	SAS	HG03716	0	0	1	FALSE	haploid	TRUE	unrelated
HG03717	265	HG03717.LILRA7.tsv	5.5835	1	0.999988	ITU	SAS	HG03717	0	0	2	FALSE	haploid	TRUE	unrelated
HG03718	193	HG03718.LILRA7.tsv	5.26786	1	1	ITU	SAS	HG03718	0	0	1	FALSE	haploid	TRUE	unrelated
HG03720	0	HG03720.LILRA7.tsv	0	0	1	ITU	SAS	HG03720	0	0	1	FALSE	haploid	TRUE	unrelated
HG03722	0	HG03722.LILRA7.tsv	0	0	1	ITU	SAS	HG03722	0	0	2	FALSE	haploid	TRUE	unrelated
HG03727	0	HG03727.LILRA7.tsv	0	0	1	ITU	SAS	HG03727	0	0	1	FALSE	haploid	TRUE	unrelated
HG03729	0	HG03729.LILRA7.tsv	0	0	1	ITU	SAS	HG03729	0	0	1	FALSE	haploid	TRUE	unrelated
HG03730	0	HG03730.LILRA7.tsv	0	0	1	ITU	SAS	HG03730	0	0	2	FALSE	haploid	TRUE	unrelated
HG03731	0	HG03731.LILRA7.tsv	0	0	1	ITU	SAS	HG03731	0	0	2	FALSE	haploid	TRUE	unrelated
HG03733	278	HG03733.LILRA7.tsv	5.63121	1	0.999973	STU	SAS	HG03733	0	0	2	FALSE	haploid	TRUE	unrelated
HG03736	214	HG03736.LILRA7.tsv	5.37064	1	1	STU	SAS	HG03736	0	0	2	FALSE	haploid	TRUE	unrelated
HG03738	0	HG03738.LILRA7.tsv	0	0	1	STU	SAS	HG03738	0	0	1	FALSE	haploid	TRUE	unrelated
HG03740	0	HG03740.LILRA7.tsv	0	0	1	STU	SAS	HG03740	0	0	1	FALSE	haploid	TRUE	unrelated
HG03741	211	HG03741.LILRA7.tsv	5.35659	1	1	STU	SAS	HG03741	0	0	2	FALSE	haploid	TRUE	unrelated
HG03742	0	HG03742.LILRA7.tsv	0	0	1	ITU	SAS	HG03742	0	0	1	FALSE	haploid	TRUE	unrelated
HG03743	0	HG03743.LILRA7.tsv	0	0	1	STU	SAS	HG03743	0	0	1	FALSE	haploid	TRUE	unrelated
HG03744	0	HG03744.LILRA7.tsv	0	0	1	STU	SAS	HG03744	0	0	1	FALSE	haploid	TRUE	unrelated
HG03745	0	HG03745.LILRA7.tsv	0	0	1	STU	SAS	HG03745	0	0	1	FALSE	haploid	TRUE	unrelated
HG03746	0	HG03746.LILRA7.tsv	0	0	1	STU	SAS	HG03746	0	0	1	FALSE	haploid	TRUE	unrelated
HG03750	0	HG03750.LILRA7.tsv	0	0	1	STU	SAS	HG03750	0	0	1	FALSE	haploid	TRUE	unrelated
HG03752	0	HG03752.LILRA7.tsv	0	0	1	STU	SAS	HG03752	0	0	2	FALSE	haploid	TRUE	unrelated
HG03753	0	HG03753.LILRA7.tsv	0	0	1	STU	SAS	HG03753	0	0	1	FALSE	haploid	TRUE	unrelated
HG03754	0	HG03754.LILRA7.tsv	0	0	1	STU	SAS	HG03754	0	0	2	FALSE	haploid	TRUE	unrelated
HG03755	0	HG03755.LILRA7.tsv	0	0	1	STU	SAS	HG03755	0	0	1	FALSE	haploid	TRUE	unrelated
HG03756	248	HG03756.LILRA7.tsv	5.51745	1	0.999996	STU	SAS	HG03756	0	0	2	FALSE	haploid	TRUE	unrelated
HG03757	199	HG03757.LILRA7.tsv	5.29832	1	1	STU	SAS	HG03757	0	0	2	FALSE	haploid	TRUE	unrelated
HG03760	236	HG03760.LILRA7.tsv	5.46806	1	0.999998	STU	SAS	HG03760	0	0	2	FALSE	haploid	TRUE	unrelated
HG03762	218	HG03762.LILRA7.tsv	5.38907	1	0.999999	PJL	SAS	HG03762	0	0	2	FALSE	haploid	TRUE	unrelated
HG03765	0	HG03765.LILRA7.tsv	0	0	1	PJL	SAS	HG03765	0	0	2	FALSE	haploid	TRUE	unrelated
HG03767	0	HG03767.LILRA7.tsv	0	0	1	PJL	SAS	HG03767	0	0	1	FALSE	haploid	TRUE	unrelated
HG03770	0	HG03770.LILRA7.tsv	0	0	1	ITU	SAS	HG03770	0	0	2	FALSE	haploid	TRUE	unrelated
HG03771	0	HG03771.LILRA7.tsv	0	0	1	ITU	SAS	HG03771	0	0	1	FALSE	haploid	TRUE	unrelated
HG03772	0	HG03772.LILRA7.tsv	0	0	1	ITU	SAS	HG03772	0	0	2	FALSE	haploid	TRUE	unrelated
HG03773	322	HG03773.LILRA7.tsv	5.77765	1	0.999566	ITU	SAS	HG03773	0	0	1	FALSE	haploid	TRUE	unrelated
HG03774	0	HG03774.LILRA7.tsv	0	0	1	ITU	SAS	HG03774	0	0	2	FALSE	haploid	TRUE	unrelated
HG03775	0	HG03775.LILRA7.tsv	0	0	1	ITU	SAS	HG03775	0	0	1	FALSE	haploid	TRUE	unrelated
HG03777	0	HG03777.LILRA7.tsv	0	0	1	ITU	SAS	HG03777	0	0	1	FALSE	haploid	TRUE	unrelated
HG03778	0	HG03778.LILRA7.tsv	0	0	1	ITU	SAS	HG03778	0	0	1	FALSE	haploid	TRUE	unrelated
HG03779	0	HG03779.LILRA7.tsv	0	0	1	ITU	SAS	HG03779	0	0	1	FALSE	haploid	TRUE	unrelated
HG03780	0	HG03780.LILRA7.tsv	0	0	1	ITU	SAS	HG03780	0	0	2	FALSE	haploid	TRUE	unrelated
HG03781	209	HG03781.LILRA7.tsv	5.34711	1	1	ITU	SAS	HG03781	0	0	2	FALSE	haploid	TRUE	unrelated
HG03782	0	HG03782.LILRA7.tsv	0	0	1	ITU	SAS	HG03782	0	0	2	FALSE	haploid	TRUE	unrelated
HG03784	226	HG03784.LILRA7.tsv	5.42495	1	0.999999	ITU	SAS	HG03784	0	0	2	FALSE	haploid	TRUE	unrelated
HG03785	0	HG03785.LILRA7.tsv	0	0	1	ITU	SAS	HG03785	0	0	1	FALSE	haploid	TRUE	unrelated
HG03786	0	HG03786.LILRA7.tsv	0	0	1	ITU	SAS	HG03786	0	0	1	FALSE	haploid	TRUE	unrelated
HG03787	226	HG03787.LILRA7.tsv	5.42495	1	0.999999	ITU	SAS	HG03787	0	0	2	FALSE	haploid	TRUE	unrelated
HG03788	0	HG03788.LILRA7.tsv	0	0	1	ITU	SAS	HG03788	0	0	1	FALSE	haploid	TRUE	unrelated
HG03789	0	HG03789.LILRA7.tsv	0	0	1	ITU	SAS	HG03789	0	0	2	FALSE	haploid	TRUE	unrelated
HG03790	0	HG03790.LILRA7.tsv	0	0	1	ITU	SAS	HG03790	0	0	1	FALSE	haploid	TRUE	unrelated
HG03792	0	HG03792.LILRA7.tsv	0	0	1	ITU	SAS	HG03792	0	0	1	FALSE	haploid	TRUE	unrelated
HG03793	0	HG03793.LILRA7.tsv	0	0	1	BEB	SAS	HG03793	0	0	2	FALSE	haploid	TRUE	unrelated
HG03796	229	HG03796.LILRA7.tsv	5.43808	1	0.999999	BEB	SAS	HG03796	0	0	2	FALSE	haploid	TRUE	unrelated
HG03800	0	HG03800.LILRA7.tsv	0	0	1	BEB	SAS	HG03800	0	0	1	FALSE	haploid	TRUE	unrelated
HG03802	0	HG03802.LILRA7.tsv	0	0	1	BEB	SAS	HG03802	0	0	2	FALSE	haploid	TRUE	unrelated
HG03803	0	HG03803.LILRA7.tsv	0	0	1	BEB	SAS	HG03803	0	0	1	FALSE	haploid	TRUE	unrelated
HG03805	228	HG03805.LILRA7.tsv	5.43372	1	0.999999	BEB	SAS	HG03805	0	0	2	FALSE	haploid	TRUE	unrelated
HG03808	0	HG03808.LILRA7.tsv	0	0	1	BEB	SAS	HG03808	0	0	2	FALSE	haploid	TRUE	unrelated
HG03809	0	HG03809.LILRA7.tsv	0	0	1	BEB	SAS	HG03809	0	0	1	FALSE	haploid	TRUE	unrelated
HG03812	2	HG03812.LILRA7.tsv	1.09861	0	0.999999	BEB	SAS	HG03812	0	0	1	FALSE	haploid	TRUE	unrelated
HG03814	0	HG03814.LILRA7.tsv	0	0	1	BEB	SAS	HG03814	0	0	2	FALSE	haploid	TRUE	unrelated
HG03815	0	HG03815.LILRA7.tsv	0	0	1	BEB	SAS	HG03815	0	0	1	FALSE	haploid	TRUE	unrelated
HG03817	0	HG03817.LILRA7.tsv	0	0	1	BEB	SAS	HG03817	0	0	2	FALSE	haploid	TRUE	unrelated
HG03821	253	HG03821.LILRA7.tsv	5.53733	1	0.999994	BEB	SAS	HG03821	0	0	1	FALSE	haploid	TRUE	unrelated
HG03823	0	HG03823.LILRA7.tsv	0	0	1	BEB	SAS	HG03823	0	0	2	FALSE	haploid	TRUE	unrelated
HG03824	212	HG03824.LILRA7.tsv	5.36129	1	1	BEB	SAS	HG03824	0	0	1	FALSE	haploid	TRUE	unrelated
HG03826	0	HG03826.LILRA7.tsv	0	0	1	BEB	SAS	HG03826	0	0	2	FALSE	haploid	TRUE	unrelated
HG03829	0	HG03829.LILRA7.tsv	0	0	1	BEB	SAS	HG03829	0	0	2	FALSE	haploid	TRUE	unrelated
HG03830	0	HG03830.LILRA7.tsv	0	0	1	BEB	SAS	HG03830	0	0	1	FALSE	haploid	TRUE	unrelated
HG03832	0	HG03832.LILRA7.tsv	0	0	1	BEB	SAS	HG03832	0	0	2	FALSE	haploid	TRUE	unrelated
HG03833	0	HG03833.LILRA7.tsv	0	0	1	BEB	SAS	HG03833	0	0	1	FALSE	haploid	TRUE	unrelated
HG03836	0	HG03836.LILRA7.tsv	0	0	1	STU	SAS	HG03836	0	0	2	FALSE	haploid	TRUE	unrelated
HG03837	206	HG03837.LILRA7.tsv	5.33272	1	1	STU	SAS	HG03837	0	0	1	FALSE	haploid	TRUE	unrelated
HG03838	0	HG03838.LILRA7.tsv	0	0	1	STU	SAS	HG03838	0	0	2	FALSE	haploid	TRUE	unrelated
HG03844	0	HG03844.LILRA7.tsv	0	0	1	STU	SAS	HG03844	0	0	1	FALSE	haploid	TRUE	unrelated
HG03846	0	HG03846.LILRA7.tsv	0	0	1	STU	SAS	HG03846	0	0	1	FALSE	haploid	TRUE	unrelated
HG03848	0	HG03848.LILRA7.tsv	0	0	1	STU	SAS	HG03848	0	0	1	FALSE	haploid	TRUE	unrelated
HG03849	250	HG03849.LILRA7.tsv	5.52545	1	0.999995	STU	SAS	HG03849	0	0	2	FALSE	haploid	TRUE	unrelated
HG03850	0	HG03850.LILRA7.tsv	0	0	1	STU	SAS	HG03850	0	0	1	FALSE	haploid	TRUE	unrelated
HG03851	0	HG03851.LILRA7.tsv	0	0	1	STU	SAS	HG03851	0	0	1	FALSE	haploid	TRUE	unrelated
HG03854	0	HG03854.LILRA7.tsv	0	0	1	STU	SAS	HG03854	0	0	1	FALSE	haploid	TRUE	unrelated
HG03856	0	HG03856.LILRA7.tsv	0	0	1	STU	SAS	HG03856	0	0	1	FALSE	haploid	TRUE	unrelated
HG03857	0	HG03857.LILRA7.tsv	0	0	1	STU	SAS	HG03857	0	0	2	FALSE	haploid	TRUE	unrelated
HG03858	0	HG03858.LILRA7.tsv	0	0	1	STU	SAS	HG03858	0	0	2	FALSE	haploid	TRUE	unrelated
HG03861	209	HG03861.LILRA7.tsv	5.34711	1	1	ITU	SAS	HG03861	0	0	2	FALSE	haploid	TRUE	unrelated
HG03862	258	HG03862.LILRA7.tsv	5.55683	1	0.999992	ITU	SAS	HG03862	0	0	2	FALSE	haploid	TRUE	unrelated
HG03863	0	HG03863.LILRA7.tsv	0	0	1	ITU	SAS	HG03863	0	0	2	FALSE	haploid	TRUE	unrelated
HG03864	0	HG03864.LILRA7.tsv	0	0	1	ITU	SAS	HG03864	0	0	1	FALSE	haploid	TRUE	unrelated
HG03866	0	HG03866.LILRA7.tsv	0	0	1	ITU	SAS	HG03866	0	0	1	FALSE	haploid	TRUE	unrelated
HG03867	0	HG03867.LILRA7.tsv	0	0	1	ITU	SAS	HG03867	0	0	1	FALSE	haploid	TRUE	unrelated
HG03868	0	HG03868.LILRA7.tsv	0	0	1	ITU	SAS	HG03868	0	0	2	FALSE	haploid	TRUE	unrelated
HG03869	2	HG03869.LILRA7.tsv	1.09861	0	0.999999	ITU	SAS	HG03869	0	0	1	FALSE	haploid	TRUE	unrelated
HG03870	0	HG03870.LILRA7.tsv	0	0	1	ITU	SAS	HG03870	0	0	1	FALSE	haploid	TRUE	unrelated
HG03871	0	HG03871.LILRA7.tsv	0	0	1	ITU	SAS	HG03871	0	0	1	FALSE	haploid	TRUE	unrelated
HG03872	0	HG03872.LILRA7.tsv	0	0	1	ITU	SAS	HG03872	0	0	1	FALSE	haploid	TRUE	unrelated
HG03873	0	HG03873.LILRA7.tsv	0	0	1	ITU	SAS	HG03873	0	0	2	FALSE	haploid	TRUE	unrelated
HG03874	0	HG03874.LILRA7.tsv	0	0	1	ITU	SAS	HG03874	0	0	2	FALSE	haploid	TRUE	unrelated
HG03875	0	HG03875.LILRA7.tsv	0	0	1	ITU	SAS	HG03875	0	0	1	FALSE	haploid	TRUE	unrelated
HG03882	0	HG03882.LILRA7.tsv	0	0	1	ITU	SAS	HG03882	0	0	2	FALSE	haploid	TRUE	unrelated
HG03884	0	HG03884.LILRA7.tsv	0	0	1	STU	SAS	HG03884	0	0	2	FALSE	haploid	TRUE	unrelated
HG03885	0	HG03885.LILRA7.tsv	0	0	1	STU	SAS	HG03885	0	0	1	FALSE	haploid	TRUE	unrelated
HG03886	0	HG03886.LILRA7.tsv	0	0	1	STU	SAS	HG03886	0	0	2	FALSE	haploid	TRUE	unrelated
HG03887	0	HG03887.LILRA7.tsv	0	0	1	STU	SAS	HG03887	0	0	1	FALSE	haploid	TRUE	unrelated
HG03888	0	HG03888.LILRA7.tsv	0	0	1	STU	SAS	HG03888	0	0	2	FALSE	haploid	TRUE	unrelated
HG03890	0	HG03890.LILRA7.tsv	0	0	1	STU	SAS	HG03890	0	0	1	FALSE	haploid	TRUE	unrelated
HG03894	0	HG03894.LILRA7.tsv	0	0	1	STU	SAS	HG03894	0	0	2	FALSE	haploid	TRUE	unrelated
HG03895	0	HG03895.LILRA7.tsv	0	0	1	STU	SAS	HG03895	0	0	2	FALSE	haploid	TRUE	unrelated
HG03896	0	HG03896.LILRA7.tsv	0	0	1	STU	SAS	HG03896	0	0	1	FALSE	haploid	TRUE	unrelated
HG03897	269	HG03897.LILRA7.tsv	5.59842	1	0.999985	STU	SAS	HG03897	0	0	2	FALSE	haploid	TRUE	unrelated
HG03898	0	HG03898.LILRA7.tsv	0	0	1	STU	SAS	HG03898	0	0	2	FALSE	haploid	TRUE	unrelated
HG03899	251	HG03899.LILRA7.tsv	5.52943	1	0.999995	STU	SAS	HG03899	0	0	1	FALSE	haploid	TRUE	unrelated
HG03900	257	HG03900.LILRA7.tsv	5.55296	1	0.999993	STU	SAS	HG03900	0	0	1	FALSE	haploid	TRUE	unrelated
HG03902	318	HG03902.LILRA7.tsv	5.76519	1	0.999663	BEB	SAS	HG03902	0	0	1	FALSE	haploid	TRUE	unrelated
HG03905	243	HG03905.LILRA7.tsv	5.49717	1	0.999997	BEB	SAS	HG03905	0	0	1	FALSE	haploid	TRUE	unrelated
HG03907	0	HG03907.LILRA7.tsv	0	0	1	BEB	SAS	HG03907	0	0	2	FALSE	haploid	TRUE	unrelated
HG03908	0	HG03908.LILRA7.tsv	0	0	1	BEB	SAS	HG03908	0	0	1	FALSE	haploid	TRUE	unrelated
HG03910	0	HG03910.LILRA7.tsv	0	0	1	BEB	SAS	HG03910	0	0	2	FALSE	haploid	TRUE	unrelated
HG03911	0	HG03911.LILRA7.tsv	0	0	1	BEB	SAS	HG03911	0	0	1	FALSE	haploid	TRUE	unrelated
HG03913	0	HG03913.LILRA7.tsv	0	0	1	BEB	SAS	HG03913	0	0	2	FALSE	haploid	TRUE	unrelated
HG03914	0	HG03914.LILRA7.tsv	0	0	1	BEB	SAS	HG03914	0	0	1	FALSE	haploid	TRUE	unrelated
HG03916	232	HG03916.LILRA7.tsv	5.45104	1	0.999999	BEB	SAS	HG03916	0	0	2	FALSE	haploid	TRUE	unrelated
HG03917	0	HG03917.LILRA7.tsv	0	0	1	BEB	SAS	HG03917	0	0	1	FALSE	haploid	TRUE	unrelated
HG03919	0	HG03919.LILRA7.tsv	0	0	1	BEB	SAS	HG03919	0	0	2	FALSE	haploid	TRUE	unrelated
HG03920	0	HG03920.LILRA7.tsv	0	0	1	BEB	SAS	HG03920	0	0	1	FALSE	haploid	TRUE	unrelated
HG03922	0	HG03922.LILRA7.tsv	0	0	1	BEB	SAS	HG03922	0	0	2	FALSE	haploid	TRUE	unrelated
HG03925	494	HG03925.LILRA7.tsv	6.20456	2	0.957285	BEB	SAS	HG03925	0	0	2	FALSE	diploid	TRUE	unrelated
HG03926	0	HG03926.LILRA7.tsv	0	0	1	BEB	SAS	HG03926	0	0	1	FALSE	haploid	TRUE	unrelated
HG03928	486	HG03928.LILRA7.tsv	6.18826	2	0.931173	BEB	SAS	HG03928	0	0	2	FALSE	diploid	TRUE	unrelated
HG03931	0	HG03931.LILRA7.tsv	0	0	1	BEB	SAS	HG03931	0	0	2	FALSE	haploid	TRUE	unrelated
HG03934	0	HG03934.LILRA7.tsv	0	0	1	BEB	SAS	HG03934	0	0	2	FALSE	haploid	TRUE	unrelated
HG03937	0	HG03937.LILRA7.tsv	0	0	1	BEB	SAS	HG03937	0	0	2	FALSE	haploid	TRUE	unrelated
HG03940	0	HG03940.LILRA7.tsv	0	0	1	BEB	SAS	HG03940	0	0	2	FALSE	haploid	TRUE	unrelated
HG03941	265	HG03941.LILRA7.tsv	5.5835	1	0.999988	BEB	SAS	HG03941	0	0	1	FALSE	haploid	TRUE	unrelated
HG03943	0	HG03943.LILRA7.tsv	0	0	1	STU	SAS	HG03943	0	0	1	FALSE	haploid	TRUE	unrelated
HG03944	0	HG03944.LILRA7.tsv	0	0	1	STU	SAS	HG03944	0	0	2	FALSE	haploid	TRUE	unrelated
HG03945	0	HG03945.LILRA7.tsv	0	0	1	STU	SAS	HG03945	0	0	2	FALSE	haploid	TRUE	unrelated
HG03947	273	HG03947.LILRA7.tsv	5.61313	1	0.99998	STU	SAS	HG03947	0	0	2	FALSE	haploid	TRUE	unrelated
HG03949	2	HG03949.LILRA7.tsv	1.09861	0	0.999999	STU	SAS	HG03949	0	0	2	FALSE	haploid	TRUE	unrelated
HG03950	0	HG03950.LILRA7.tsv	0	0	1	STU	SAS	HG03950	0	0	1	FALSE	haploid	TRUE	unrelated
HG03951	0	HG03951.LILRA7.tsv	0	0	1	STU	SAS	HG03951	0	0	2	FALSE	haploid	TRUE	unrelated
HG03953	188	HG03953.LILRA7.tsv	5.24175	1	1	STU	SAS	HG03953	0	0	1	FALSE	haploid	TRUE	unrelated
HG03955	0	HG03955.LILRA7.tsv	0	0	1	STU	SAS	HG03955	0	0	2	FALSE	haploid	TRUE	unrelated
HG03960	0	HG03960.LILRA7.tsv	0	0	1	ITU	SAS	HG03960	0	0	1	FALSE	haploid	TRUE	unrelated
HG03963	302	HG03963.LILRA7.tsv	5.71373	1	0.999877	ITU	SAS	HG03963	0	0	1	FALSE	haploid	TRUE	unrelated
HG03965	0	HG03965.LILRA7.tsv	0	0	1	ITU	SAS	HG03965	0	0	1	FALSE	haploid	TRUE	unrelated
HG03967	232	HG03967.LILRA7.tsv	5.45104	1	0.999999	ITU	SAS	HG03967	0	0	1	FALSE	haploid	TRUE	unrelated
HG03968	264	HG03968.LILRA7.tsv	5.57973	1	0.999989	ITU	SAS	HG03968	0	0	2	FALSE	haploid	TRUE	unrelated
HG03969	0	HG03969.LILRA7.tsv	0	0	1	ITU	SAS	HG03969	0	0	1	FALSE	haploid	TRUE	unrelated
HG03971	0	HG03971.LILRA7.tsv	0	0	1	ITU	SAS	HG03971	0	0	1	FALSE	haploid	TRUE	unrelated
HG03973	0	HG03973.LILRA7.tsv	0	0	1	ITU	SAS	HG03973	0	0	2	FALSE	haploid	TRUE	unrelated
HG03974	0	HG03974.LILRA7.tsv	0	0	1	ITU	SAS	HG03974	0	0	1	FALSE	haploid	TRUE	unrelated
HG03976	239	HG03976.LILRA7.tsv	5.48064	1	0.999998	ITU	SAS	HG03976	0	0	1	FALSE	haploid	TRUE	unrelated
HG03977	0	HG03977.LILRA7.tsv	0	0	1	ITU	SAS	HG03977	0	0	2	FALSE	haploid	TRUE	unrelated
HG03978	244	HG03978.LILRA7.tsv	5.50126	1	0.999997	ITU	SAS	HG03978	0	0	1	FALSE	haploid	TRUE	unrelated
HG03985	233	HG03985.LILRA7.tsv	5.45532	1	0.999998	STU	SAS	HG03985	0	0	1	FALSE	haploid	TRUE	unrelated
HG03986	0	HG03986.LILRA7.tsv	0	0	1	STU	SAS	HG03986	0	0	2	FALSE	haploid	TRUE	unrelated
HG03989	253	HG03989.LILRA7.tsv	5.53733	1	0.999994	STU	SAS	HG03989	0	0	2	FALSE	haploid	TRUE	unrelated
HG03990	0	HG03990.LILRA7.tsv	0	0	1	STU	SAS	HG03990	0	0	1	FALSE	haploid	TRUE	unrelated
HG03991	269	HG03991.LILRA7.tsv	5.59842	1	0.999985	STU	SAS	HG03991	0	0	1	FALSE	haploid	TRUE	unrelated
HG03995	0	HG03995.LILRA7.tsv	0	0	1	STU	SAS	HG03995	0	0	2	FALSE	haploid	TRUE	unrelated
HG03998	0	HG03998.LILRA7.tsv	0	0	1	STU	SAS	HG03998	0	0	1	FALSE	haploid	TRUE	unrelated
HG03999	222	HG03999.LILRA7.tsv	5.40717	1	0.999999	STU	SAS	HG03999	0	0	1	FALSE	haploid	TRUE	unrelated
HG04001	292	HG04001.LILRA7.tsv	5.68017	1	0.999935	ITU	SAS	HG04001	0	0	2	FALSE	haploid	TRUE	unrelated
HG04002	0	HG04002.LILRA7.tsv	0	0	1	ITU	SAS	HG04002	0	0	1	FALSE	haploid	TRUE	unrelated
HG04003	0	HG04003.LILRA7.tsv	0	0	1	STU	SAS	HG04003	0	0	1	FALSE	haploid	TRUE	unrelated
HG04006	0	HG04006.LILRA7.tsv	0	0	1	STU	SAS	HG04006	0	0	1	FALSE	haploid	TRUE	unrelated
HG04014	0	HG04014.LILRA7.tsv	0	0	1	ITU	SAS	HG04014	0	0	2	FALSE	haploid	TRUE	unrelated
HG04015	231	HG04015.LILRA7.tsv	5.44674	1	0.999999	ITU	SAS	HG04015	0	0	1	FALSE	haploid	TRUE	unrelated
HG04017	0	HG04017.LILRA7.tsv	0	0	1	ITU	SAS	HG04017	0	0	1	FALSE	haploid	TRUE	unrelated
HG04018	0	HG04018.LILRA7.tsv	0	0	1	ITU	SAS	HG04018	0	0	2	FALSE	haploid	TRUE	unrelated
HG04019	0	HG04019.LILRA7.tsv	0	0	1	ITU	SAS	HG04019	0	0	1	FALSE	haploid	TRUE	unrelated
HG04020	0	HG04020.LILRA7.tsv	0	0	1	ITU	SAS	HG04020	0	0	1	FALSE	haploid	TRUE	unrelated
HG04022	269	HG04022.LILRA7.tsv	5.59842	1	0.999985	ITU	SAS	HG04022	0	0	1	FALSE	haploid	TRUE	unrelated
HG04023	218	HG04023.LILRA7.tsv	5.38907	1	0.999999	ITU	SAS	HG04023	0	0	1	FALSE	haploid	TRUE	unrelated
HG04025	0	HG04025.LILRA7.tsv	0	0	1	ITU	SAS	HG04025	0	0	2	FALSE	haploid	TRUE	unrelated
HG04026	266	HG04026.LILRA7.tsv	5.58725	1	0.999987	ITU	SAS	HG04026	0	0	2	FALSE	haploid	TRUE	unrelated
HG04029	0	HG04029.LILRA7.tsv	0	0	1	STU	SAS	HG04029	0	0	2	FALSE	haploid	TRUE	unrelated
HG04033	0	HG04033.LILRA7.tsv	0	0	1	STU	SAS	HG04033	0	0	1	FALSE	haploid	TRUE	unrelated
HG04035	0	HG04035.LILRA7.tsv	0	0	1	STU	SAS	HG04035	0	0	2	FALSE	haploid	TRUE	unrelated
HG04038	218	HG04038.LILRA7.tsv	5.38907	1	0.999999	STU	SAS	HG04038	0	0	2	FALSE	haploid	TRUE	unrelated
HG04039	0	HG04039.LILRA7.tsv	0	0	1	STU	SAS	HG04039	0	0	1	FALSE	haploid	TRUE	unrelated
HG04042	225	HG04042.LILRA7.tsv	5.42053	1	0.999999	STU	SAS	HG04042	0	0	2	FALSE	haploid	TRUE	unrelated
HG04047	0	HG04047.LILRA7.tsv	0	0	1	STU	SAS	HG04047	0	0	2	FALSE	haploid	TRUE	unrelated
HG04054	261	HG04054.LILRA7.tsv	5.56834	1	0.999991	ITU	SAS	HG04054	0	0	2	FALSE	haploid	TRUE	unrelated
HG04056	232	HG04056.LILRA7.tsv	5.45104	1	0.999999	ITU	SAS	HG04056	0	0	1	FALSE	haploid	TRUE	unrelated
HG04059	0	HG04059.LILRA7.tsv	0	0	1	ITU	SAS	HG04059	0	0	2	FALSE	haploid	TRUE	unrelated
HG04060	0	HG04060.LILRA7.tsv	0	0	1	ITU	SAS	HG04060	0	0	1	FALSE	haploid	TRUE	unrelated
HG04061	0	HG04061.LILRA7.tsv	0	0	1	ITU	SAS	HG04061	0	0	1	FALSE	haploid	TRUE	unrelated
HG04062	0	HG04062.LILRA7.tsv	0	0	1	ITU	SAS	HG04062	0	0	2	FALSE	haploid	TRUE	unrelated
HG04063	0	HG04063.LILRA7.tsv	0	0	1	ITU	SAS	HG04063	0	0	2	FALSE	haploid	TRUE	unrelated
HG04070	0	HG04070.LILRA7.tsv	0	0	1	ITU	SAS	HG04070	0	0	2	FALSE	haploid	TRUE	unrelated
HG04075	0	HG04075.LILRA7.tsv	0	0	1	STU	SAS	HG04075	0	0	2	FALSE	haploid	TRUE	unrelated
HG04076	0	HG04076.LILRA7.tsv	0	0	1	ITU	SAS	HG04076	0	0	2	FALSE	haploid	TRUE	unrelated
HG04080	0	HG04080.LILRA7.tsv	0	0	1	ITU	SAS	HG04080	0	0	1	FALSE	haploid	TRUE	unrelated
HG04090	0	HG04090.LILRA7.tsv	0	0	1	ITU	SAS	HG04090	0	0	2	FALSE	haploid	TRUE	unrelated
HG04093	0	HG04093.LILRA7.tsv	0	0	1	ITU	SAS	HG04093	0	0	1	FALSE	haploid	TRUE	unrelated
HG04094	0	HG04094.LILRA7.tsv	0	0	1	ITU	SAS	HG04094	0	0	1	FALSE	haploid	TRUE	unrelated
HG04096	0	HG04096.LILRA7.tsv	0	0	1	ITU	SAS	HG04096	0	0	1	FALSE	haploid	TRUE	unrelated
HG04098	0	HG04098.LILRA7.tsv	0	0	1	ITU	SAS	HG04098	0	0	1	FALSE	haploid	TRUE	unrelated
HG04099	1	HG04099.LILRA7.tsv	0.693147	0	0.999999	STU	SAS	HG04099	0	0	2	FALSE	haploid	TRUE	unrelated
HG04100	0	HG04100.LILRA7.tsv	0	0	1	STU	SAS	HG04100	0	0	1	FALSE	haploid	TRUE	unrelated
HG04106	0	HG04106.LILRA7.tsv	0	0	1	STU	SAS	HG04106	0	0	2	FALSE	haploid	TRUE	unrelated
HG04107	0	HG04107.LILRA7.tsv	0	0	1	STU	SAS	HG04107	0	0	1	FALSE	haploid	TRUE	unrelated
HG04118	0	HG04118.LILRA7.tsv	0	0	1	ITU	SAS	HG04118	0	0	2	FALSE	haploid	TRUE	unrelated
HG04131	211	HG04131.LILRA7.tsv	5.35659	1	1	BEB	SAS	HG04131	0	0	1	FALSE	haploid	TRUE	unrelated
HG04134	0	HG04134.LILRA7.tsv	0	0	1	BEB	SAS	HG04134	0	0	1	FALSE	haploid	TRUE	unrelated
HG04140	269	HG04140.LILRA7.tsv	5.59842	1	0.999985	BEB	SAS	HG04140	0	0	1	FALSE	haploid	TRUE	unrelated
HG04141	336	HG04141.LILRA7.tsv	5.82008	1	0.99895	BEB	SAS	HG04141	0	0	2	FALSE	haploid	TRUE	unrelated
HG04144	0	HG04144.LILRA7.tsv	0	0	1	BEB	SAS	HG04144	0	0	2	FALSE	haploid	TRUE	unrelated
HG04146	0	HG04146.LILRA7.tsv	0	0	1	BEB	SAS	HG04146	0	0	1	FALSE	haploid	TRUE	unrelated
HG04152	0	HG04152.LILRA7.tsv	0	0	1	BEB	SAS	HG04152	0	0	1	FALSE	haploid	TRUE	unrelated
HG04153	0	HG04153.LILRA7.tsv	0	0	1	BEB	SAS	HG04153	0	0	2	FALSE	haploid	TRUE	unrelated
HG04155	0	HG04155.LILRA7.tsv	0	0	1	BEB	SAS	HG04155	0	0	1	FALSE	haploid	TRUE	unrelated
HG04156	0	HG04156.LILRA7.tsv	0	0	1	BEB	SAS	HG04156	0	0	2	FALSE	haploid	TRUE	unrelated
HG04158	0	HG04158.LILRA7.tsv	0	0	1	BEB	SAS	HG04158	0	0	1	FALSE	haploid	TRUE	unrelated
HG04159	0	HG04159.LILRA7.tsv	0	0	1	BEB	SAS	HG04159	0	0	2	FALSE	haploid	TRUE	unrelated
HG04161	267	HG04161.LILRA7.tsv	5.59099	1	0.999986	BEB	SAS	HG04161	0	0	1	FALSE	haploid	TRUE	unrelated
HG04162	0	HG04162.LILRA7.tsv	0	0	1	BEB	SAS	HG04162	0	0	2	FALSE	haploid	TRUE	unrelated
HG04164	0	HG04164.LILRA7.tsv	0	0	1	BEB	SAS	HG04164	0	0	1	FALSE	haploid	TRUE	unrelated
HG04171	0	HG04171.LILRA7.tsv	0	0	1	BEB	SAS	HG04171	0	0	2	FALSE	haploid	TRUE	unrelated
HG04173	0	HG04173.LILRA7.tsv	0	0	1	BEB	SAS	HG04173	0	0	1	FALSE	haploid	TRUE	unrelated
HG04176	213	HG04176.LILRA7.tsv	5.36598	1	1	BEB	SAS	HG04176	0	0	1	FALSE	haploid	TRUE	unrelated
HG04177	0	HG04177.LILRA7.tsv	0	0	1	BEB	SAS	HG04177	0	0	2	FALSE	haploid	TRUE	unrelated
HG04180	0	HG04180.LILRA7.tsv	0	0	1	BEB	SAS	HG04180	0	0	2	FALSE	haploid	TRUE	unrelated
HG04182	0	HG04182.LILRA7.tsv	0	0	1	BEB	SAS	HG04182	0	0	1	FALSE	haploid	TRUE	unrelated
HG04183	0	HG04183.LILRA7.tsv	0	0	1	BEB	SAS	HG04183	0	0	2	FALSE	haploid	TRUE	unrelated
HG04185	2	HG04185.LILRA7.tsv	1.09861	0	0.999999	BEB	SAS	HG04185	0	0	1	FALSE	haploid	TRUE	unrelated
HG04186	0	HG04186.LILRA7.tsv	0	0	1	BEB	SAS	HG04186	0	0	2	FALSE	haploid	TRUE	unrelated
HG04188	0	HG04188.LILRA7.tsv	0	0	1	BEB	SAS	HG04188	0	0	1	FALSE	haploid	TRUE	unrelated
HG04189	0	HG04189.LILRA7.tsv	0	0	1	BEB	SAS	HG04189	0	0	2	FALSE	haploid	TRUE	unrelated
HG04194	0	HG04194.LILRA7.tsv	0	0	1	BEB	SAS	HG04194	0	0	1	FALSE	haploid	TRUE	unrelated
HG04195	0	HG04195.LILRA7.tsv	0	0	1	BEB	SAS	HG04195	0	0	2	FALSE	haploid	TRUE	unrelated
HG04198	0	HG04198.LILRA7.tsv	0	0	1	ITU	SAS	HG04198	0	0	1	FALSE	haploid	TRUE	unrelated
HG04200	552	HG04200.LILRA7.tsv	6.31536	2	0.998852	ITU	SAS	HG04200	0	0	2	FALSE	diploid	TRUE	unrelated
HG04202	0	HG04202.LILRA7.tsv	0	0	1	ITU	SAS	HG04202	0	0	2	FALSE	haploid	TRUE	unrelated
HG04206	0	HG04206.LILRA7.tsv	0	0	1	ITU	SAS	HG04206	0	0	1	FALSE	haploid	TRUE	unrelated
HG04209	0	HG04209.LILRA7.tsv	0	0	1	ITU	SAS	HG04209	0	0	2	FALSE	haploid	TRUE	unrelated
HG04210	0	HG04210.LILRA7.tsv	0	0	1	STU	SAS	HG04210	0	0	1	FALSE	haploid	TRUE	unrelated
HG04211	0	HG04211.LILRA7.tsv	0	0	1	ITU	SAS	HG04211	0	0	1	FALSE	haploid	TRUE	unrelated
HG04212	0	HG04212.LILRA7.tsv	0	0	1	ITU	SAS	HG04212	0	0	2	FALSE	haploid	TRUE	unrelated
HG04214	0	HG04214.LILRA7.tsv	0	0	1	ITU	SAS	HG04214	0	0	2	FALSE	haploid	TRUE	unrelated
HG04216	0	HG04216.LILRA7.tsv	0	0	1	ITU	SAS	HG04216	0	0	2	FALSE	haploid	TRUE	unrelated
HG04219	0	HG04219.LILRA7.tsv	0	0	1	ITU	SAS	HG04219	0	0	1	FALSE	haploid	TRUE	unrelated
HG04222	0	HG04222.LILRA7.tsv	0	0	1	ITU	SAS	HG04222	0	0	1	FALSE	haploid	TRUE	unrelated
HG04225	310	HG04225.LILRA7.tsv	5.73979	1	0.999796	ITU	SAS	HG04225	0	0	1	FALSE	haploid	TRUE	unrelated
HG04227	0	HG04227.LILRA7.tsv	0	0	1	STU	SAS	HG04227	0	0	2	FALSE	haploid	TRUE	unrelated
HG04229	0	HG04229.LILRA7.tsv	0	0	1	STU	SAS	HG04229	0	0	1	FALSE	haploid	TRUE	unrelated
HG04235	298	HG04235.LILRA7.tsv	5.70044	1	0.999904	ITU	SAS	HG04235	0	0	1	FALSE	haploid	TRUE	unrelated
HG04238	0	HG04238.LILRA7.tsv	0	0	1	ITU	SAS	HG04238	0	0	1	FALSE	haploid	TRUE	unrelated
HG04239	206	HG04239.LILRA7.tsv	5.33272	1	1	ITU	SAS	HG04239	0	0	1	FALSE	haploid	TRUE	unrelated
NA06984	0	NA06984.LILRA7.tsv	0	0	1	CEU	EUR	NA06984	0	0	1	FALSE	haploid	TRUE	unrelated
NA06985	267	NA06985.LILRA7.tsv	5.59099	1	0.999986	CEU	EUR	NA06985	0	0	2	FALSE	haploid	TRUE	unrelated
NA06986	0	NA06986.LILRA7.tsv	0	0	1	CEU	EUR	NA06986	0	0	1	FALSE	haploid	TRUE	unrelated
NA06989	0	NA06989.LILRA7.tsv	0	0	1	CEU	EUR	NA06989	0	0	2	FALSE	haploid	TRUE	unrelated
NA06994	0	NA06994.LILRA7.tsv	0	0	1	CEU	EUR	NA06994	0	0	1	FALSE	haploid	TRUE	unrelated
NA07000	0	NA07000.LILRA7.tsv	0	0	1	CEU	EUR	NA07000	0	0	2	FALSE	haploid	TRUE	unrelated
NA07037	0	NA07037.LILRA7.tsv	0	0	1	CEU	EUR	NA07037	0	0	2	FALSE	haploid	TRUE	unrelated
NA07048	0	NA07048.LILRA7.tsv	0	0	1	CEU	EUR	NA07048	NA07034	NA07055	1	TRUE	haploid	TRUE	unrelated
NA07051	0	NA07051.LILRA7.tsv	0	0	1	CEU	EUR	NA07051	0	0	1	FALSE	haploid	TRUE	unrelated
NA07056	0	NA07056.LILRA7.tsv	0	0	1	CEU	EUR	NA07056	0	0	2	FALSE	haploid	TRUE	unrelated
NA07347	0	NA07347.LILRA7.tsv	0	0	1	CEU	EUR	NA07347	0	0	1	FALSE	haploid	TRUE	unrelated
NA07357	0	NA07357.LILRA7.tsv	0	0	1	CEU	EUR	NA07357	0	0	1	FALSE	haploid	TRUE	unrelated
NA10847	0	NA10847.LILRA7.tsv	0	0	1	CEU	EUR	NA10847	NA12146	NA12239	2	TRUE	haploid	TRUE	unrelated
NA10851	0	NA10851.LILRA7.tsv	0	0	1	CEU	EUR	NA10851	NA12056	NA12057	1	TRUE	haploid	TRUE	unrelated
NA11829	0	NA11829.LILRA7.tsv	0	0	1	CEU	EUR	NA11829	0	0	1	FALSE	haploid	TRUE	unrelated
NA11830	0	NA11830.LILRA7.tsv	0	0	1	CEU	EUR	NA11830	0	0	2	FALSE	haploid	TRUE	unrelated
NA11831	0	NA11831.LILRA7.tsv	0	0	1	CEU	EUR	NA11831	0	0	1	FALSE	haploid	TRUE	unrelated
NA11832	0	NA11832.LILRA7.tsv	0	0	1	CEU	EUR	NA11832	0	0	2	FALSE	haploid	TRUE	unrelated
NA11840	0	NA11840.LILRA7.tsv	0	0	1	CEU	EUR	NA11840	0	0	2	FALSE	haploid	TRUE	unrelated
NA11843	0	NA11843.LILRA7.tsv	0	0	1	CEU	EUR	NA11843	0	0	1	FALSE	haploid	TRUE	unrelated
NA11881	0	NA11881.LILRA7.tsv	0	0	1	CEU	EUR	NA11881	0	0	1	FALSE	haploid	TRUE	unrelated
NA11892	0	NA11892.LILRA7.tsv	0	0	1	CEU	EUR	NA11892	0	0	2	FALSE	haploid	TRUE	unrelated
NA11893	0	NA11893.LILRA7.tsv	0	0	1	CEU	EUR	NA11893	0	0	1	FALSE	haploid	TRUE	unrelated
NA11894	0	NA11894.LILRA7.tsv	0	0	1	CEU	EUR	NA11894	0	0	2	FALSE	haploid	TRUE	unrelated
NA11918	0	NA11918.LILRA7.tsv	0	0	1	CEU	EUR	NA11918	0	0	2	FALSE	haploid	TRUE	unrelated
NA11919	0	NA11919.LILRA7.tsv	0	0	1	CEU	EUR	NA11919	0	0	1	FALSE	haploid	TRUE	unrelated
NA11920	0	NA11920.LILRA7.tsv	0	0	1	CEU	EUR	NA11920	0	0	2	FALSE	haploid	TRUE	unrelated
NA11930	0	NA11930.LILRA7.tsv	0	0	1	CEU	EUR	NA11930	0	0	1	FALSE	haploid	TRUE	unrelated
NA11931	0	NA11931.LILRA7.tsv	0	0	1	CEU	EUR	NA11931	0	0	2	FALSE	haploid	TRUE	unrelated
NA11932	0	NA11932.LILRA7.tsv	0	0	1	CEU	EUR	NA11932	0	0	1	FALSE	haploid	TRUE	unrelated
NA11933	0	NA11933.LILRA7.tsv	0	0	1	CEU	EUR	NA11933	0	0	2	FALSE	haploid	TRUE	unrelated
NA11992	0	NA11992.LILRA7.tsv	0	0	1	CEU	EUR	NA11992	0	0	1	FALSE	haploid	TRUE	unrelated
NA11994	0	NA11994.LILRA7.tsv	0	0	1	CEU	EUR	NA11994	0	0	1	FALSE	haploid	TRUE	unrelated
NA11995	0	NA11995.LILRA7.tsv	0	0	1	CEU	EUR	NA11995	0	0	2	FALSE	haploid	TRUE	unrelated
NA12003	0	NA12003.LILRA7.tsv	0	0	1	CEU	EUR	NA12003	0	0	1	FALSE	haploid	TRUE	unrelated
NA12004	0	NA12004.LILRA7.tsv	0	0	1	CEU	EUR	NA12004	0	0	2	FALSE	haploid	TRUE	unrelated
NA12005	0	NA12005.LILRA7.tsv	0	0	1	CEU	EUR	NA12005	0	0	1	FALSE	haploid	TRUE	unrelated
NA12006	0	NA12006.LILRA7.tsv	0	0	1	CEU	EUR	NA12006	0	0	2	FALSE	haploid	TRUE	unrelated
NA12043	0	NA12043.LILRA7.tsv	0	0	1	CEU	EUR	NA12043	0	0	1	FALSE	haploid	TRUE	unrelated
NA12044	0	NA12044.LILRA7.tsv	0	0	1	CEU	EUR	NA12044	0	0	2	FALSE	haploid	TRUE	unrelated
NA12045	0	NA12045.LILRA7.tsv	0	0	1	CEU	EUR	NA12045	0	0	1	FALSE	haploid	TRUE	unrelated
NA12046	0	NA12046.LILRA7.tsv	0	0	1	CEU	EUR	NA12046	0	0	2	FALSE	haploid	TRUE	unrelated
NA12058	0	NA12058.LILRA7.tsv	0	0	1	CEU	EUR	NA12058	0	0	2	FALSE	haploid	TRUE	unrelated
NA12144	0	NA12144.LILRA7.tsv	0	0	1	CEU	EUR	NA12144	0	0	1	FALSE	haploid	TRUE	unrelated
NA12154	0	NA12154.LILRA7.tsv	0	0	1	CEU	EUR	NA12154	0	0	1	FALSE	haploid	TRUE	unrelated
NA12155	0	NA12155.LILRA7.tsv	0	0	1	CEU	EUR	NA12155	0	0	1	FALSE	haploid	TRUE	unrelated
NA12156	0	NA12156.LILRA7.tsv	0	0	1	CEU	EUR	NA12156	0	0	2	FALSE	haploid	TRUE	unrelated
NA12234	0	NA12234.LILRA7.tsv	0	0	1	CEU	EUR	NA12234	0	0	2	FALSE	haploid	TRUE	unrelated
NA12249	0	NA12249.LILRA7.tsv	0	0	1	CEU	EUR	NA12249	0	0	2	FALSE	haploid	TRUE	unrelated
NA12272	0	NA12272.LILRA7.tsv	0	0	1	CEU	EUR	NA12272	0	0	1	FALSE	haploid	TRUE	unrelated
NA12273	0	NA12273.LILRA7.tsv	0	0	1	CEU	EUR	NA12273	0	0	2	FALSE	haploid	TRUE	unrelated
NA12275	0	NA12275.LILRA7.tsv	0	0	1	CEU	EUR	NA12275	0	0	2	FALSE	haploid	TRUE	unrelated
NA12282	0	NA12282.LILRA7.tsv	0	0	1	CEU	EUR	NA12282	0	0	1	FALSE	haploid	TRUE	unrelated
NA12283	0	NA12283.LILRA7.tsv	0	0	1	CEU	EUR	NA12283	0	0	2	FALSE	haploid	TRUE	unrelated
NA12286	0	NA12286.LILRA7.tsv	0	0	1	CEU	EUR	NA12286	0	0	1	FALSE	haploid	TRUE	unrelated
NA12287	0	NA12287.LILRA7.tsv	0	0	1	CEU	EUR	NA12287	0	0	2	FALSE	haploid	TRUE	unrelated
NA12340	0	NA12340.LILRA7.tsv	0	0	1	CEU	EUR	NA12340	0	0	1	FALSE	haploid	TRUE	unrelated
NA12341	0	NA12341.LILRA7.tsv	0	0	1	CEU	EUR	NA12341	0	0	2	FALSE	haploid	TRUE	unrelated
NA12342	0	NA12342.LILRA7.tsv	0	0	1	CEU	EUR	NA12342	0	0	1	FALSE	haploid	TRUE	unrelated
NA12347	0	NA12347.LILRA7.tsv	0	0	1	CEU	EUR	NA12347	0	0	1	FALSE	haploid	TRUE	unrelated
NA12348	0	NA12348.LILRA7.tsv	0	0	1	CEU	EUR	NA12348	0	0	2	FALSE	haploid	TRUE	unrelated
NA12383	0	NA12383.LILRA7.tsv	0	0	1	CEU	EUR	NA12383	0	0	2	FALSE	haploid	TRUE	unrelated
NA12399	0	NA12399.LILRA7.tsv	0	0	1	CEU	EUR	NA12399	0	0	1	FALSE	haploid	TRUE	unrelated
NA12400	0	NA12400.LILRA7.tsv	0	0	1	CEU	EUR	NA12400	0	0	2	FALSE	haploid	TRUE	unrelated
NA12413	0	NA12413.LILRA7.tsv	0	0	1	CEU	EUR	NA12413	0	0	1	FALSE	haploid	TRUE	unrelated
NA12414	0	NA12414.LILRA7.tsv	0	0	1	CEU	EUR	NA12414	0	0	2	FALSE	haploid	TRUE	unrelated
NA12489	0	NA12489.LILRA7.tsv	0	0	1	CEU	EUR	NA12489	0	0	2	FALSE	haploid	TRUE	unrelated
NA12546	0	NA12546.LILRA7.tsv	0	0	1	CEU	EUR	NA12546	0	0	1	FALSE	haploid	TRUE	unrelated
NA12716	0	NA12716.LILRA7.tsv	0	0	1	CEU	EUR	NA12716	0	0	1	FALSE	haploid	TRUE	unrelated
NA12717	0	NA12717.LILRA7.tsv	0	0	1	CEU	EUR	NA12717	0	0	2	FALSE	haploid	TRUE	unrelated
NA12718	0	NA12718.LILRA7.tsv	0	0	1	CEU	EUR	NA12718	0	0	2	FALSE	haploid	TRUE	unrelated
NA12748	0	NA12748.LILRA7.tsv	0	0	1	CEU	EUR	NA12748	0	0	1	FALSE	haploid	TRUE	unrelated
NA12749	0	NA12749.LILRA7.tsv	0	0	1	CEU	EUR	NA12749	0	0	2	FALSE	haploid	TRUE	unrelated
NA12750	0	NA12750.LILRA7.tsv	0	0	1	CEU	EUR	NA12750	0	0	1	FALSE	haploid	TRUE	unrelated
NA12751	0	NA12751.LILRA7.tsv	0	0	1	CEU	EUR	NA12751	0	0	2	FALSE	haploid	TRUE	unrelated
NA12760	0	NA12760.LILRA7.tsv	0	0	1	CEU	EUR	NA12760	0	0	1	FALSE	haploid	TRUE	unrelated
NA12761	0	NA12761.LILRA7.tsv	0	0	1	CEU	EUR	NA12761	0	0	2	FALSE	haploid	TRUE	unrelated
NA12762	0	NA12762.LILRA7.tsv	0	0	1	CEU	EUR	NA12762	0	0	1	FALSE	haploid	TRUE	unrelated
NA12763	0	NA12763.LILRA7.tsv	0	0	1	CEU	EUR	NA12763	0	0	2	FALSE	haploid	TRUE	unrelated
NA12775	0	NA12775.LILRA7.tsv	0	0	1	CEU	EUR	NA12775	0	0	1	FALSE	haploid	TRUE	unrelated
NA12776	0	NA12776.LILRA7.tsv	0	0	1	CEU	EUR	NA12776	0	0	2	FALSE	haploid	TRUE	unrelated
NA12777	0	NA12777.LILRA7.tsv	0	0	1	CEU	EUR	NA12777	0	0	1	FALSE	haploid	TRUE	unrelated
NA12778	0	NA12778.LILRA7.tsv	0	0	1	CEU	EUR	NA12778	0	0	2	FALSE	haploid	TRUE	unrelated
NA12812	0	NA12812.LILRA7.tsv	0	0	1	CEU	EUR	NA12812	0	0	1	FALSE	haploid	TRUE	unrelated
NA12813	0	NA12813.LILRA7.tsv	0	0	1	CEU	EUR	NA12813	0	0	2	FALSE	haploid	TRUE	unrelated
NA12814	259	NA12814.LILRA7.tsv	5.56068	1	0.999992	CEU	EUR	NA12814	0	0	1	FALSE	haploid	TRUE	unrelated
NA12815	0	NA12815.LILRA7.tsv	0	0	1	CEU	EUR	NA12815	0	0	2	FALSE	haploid	TRUE	unrelated
NA12827	0	NA12827.LILRA7.tsv	0	0	1	CEU	EUR	NA12827	0	0	1	FALSE	haploid	TRUE	unrelated
NA12828	0	NA12828.LILRA7.tsv	0	0	1	CEU	EUR	NA12828	0	0	2	FALSE	haploid	TRUE	unrelated
NA12829	0	NA12829.LILRA7.tsv	0	0	1	CEU	EUR	NA12829	0	0	1	FALSE	haploid	TRUE	unrelated
NA12830	0	NA12830.LILRA7.tsv	0	0	1	CEU	EUR	NA12830	0	0	2	FALSE	haploid	TRUE	unrelated
NA12842	0	NA12842.LILRA7.tsv	0	0	1	CEU	EUR	NA12842	0	0	1	FALSE	haploid	TRUE	unrelated
NA12843	0	NA12843.LILRA7.tsv	0	0	1	CEU	EUR	NA12843	0	0	2	FALSE	haploid	TRUE	unrelated
NA12872	0	NA12872.LILRA7.tsv	0	0	1	CEU	EUR	NA12872	0	0	1	FALSE	haploid	TRUE	unrelated
NA12873	0	NA12873.LILRA7.tsv	0	0	1	CEU	EUR	NA12873	0	0	2	FALSE	haploid	TRUE	unrelated
NA12874	0	NA12874.LILRA7.tsv	0	0	1	CEU	EUR	NA12874	0	0	1	FALSE	haploid	TRUE	unrelated
NA12878	0	NA12878.LILRA7.tsv	0	0	1	CEU	EUR	NA12878	NA12891	NA12892	2	TRUE	haploid	TRUE	unrelated
NA12889	0	NA12889.LILRA7.tsv	0	0	1	CEU	EUR	NA12889	0	0	1	FALSE	haploid	TRUE	unrelated
NA12890	0	NA12890.LILRA7.tsv	0	0	1	CEU	EUR	NA12890	0	0	2	FALSE	haploid	TRUE	unrelated
NA18486	0	NA18486.LILRA7.tsv	0	0	1	YRI	AFR	NA18486	0	0	1	FALSE	haploid	TRUE	unrelated
NA18488	0	NA18488.LILRA7.tsv	0	0	1	YRI	AFR	NA18488	0	0	2	FALSE	haploid	TRUE	unrelated
NA18489	0	NA18489.LILRA7.tsv	0	0	1	YRI	AFR	NA18489	0	0	2	FALSE	haploid	TRUE	unrelated
NA18498	0	NA18498.LILRA7.tsv	0	0	1	YRI	AFR	NA18498	0	0	1	FALSE	haploid	TRUE	unrelated
NA18499	0	NA18499.LILRA7.tsv	0	0	1	YRI	AFR	NA18499	0	0	2	FALSE	haploid	TRUE	unrelated
NA18501	0	NA18501.LILRA7.tsv	0	0	1	YRI	AFR	NA18501	0	0	1	FALSE	haploid	TRUE	unrelated
NA18502	0	NA18502.LILRA7.tsv	0	0	1	YRI	AFR	NA18502	0	0	2	FALSE	haploid	TRUE	unrelated
NA18504	0	NA18504.LILRA7.tsv	0	0	1	YRI	AFR	NA18504	0	0	1	FALSE	haploid	TRUE	unrelated
NA18505	0	NA18505.LILRA7.tsv	0	0	1	YRI	AFR	NA18505	0	0	2	FALSE	haploid	TRUE	unrelated
NA18507	0	NA18507.LILRA7.tsv	0	0	1	YRI	AFR	NA18507	0	0	1	FALSE	haploid	TRUE	unrelated
NA18508	0	NA18508.LILRA7.tsv	0	0	1	YRI	AFR	NA18508	0	0	2	FALSE	haploid	TRUE	unrelated
NA18510	0	NA18510.LILRA7.tsv	0	0	1	YRI	AFR	NA18510	0	0	1	FALSE	haploid	TRUE	unrelated
NA18511	0	NA18511.LILRA7.tsv	0	0	1	YRI	AFR	NA18511	0	0	2	FALSE	haploid	TRUE	unrelated
NA18516	0	NA18516.LILRA7.tsv	0	0	1	YRI	AFR	NA18516	0	0	1	FALSE	haploid	TRUE	unrelated
NA18517	0	NA18517.LILRA7.tsv	0	0	1	YRI	AFR	NA18517	0	0	2	FALSE	haploid	TRUE	unrelated
NA18519	0	NA18519.LILRA7.tsv	0	0	1	YRI	AFR	NA18519	0	0	1	FALSE	haploid	TRUE	unrelated
NA18520	0	NA18520.LILRA7.tsv	0	0	1	YRI	AFR	NA18520	0	0	2	FALSE	haploid	TRUE	unrelated
NA18522	0	NA18522.LILRA7.tsv	0	0	1	YRI	AFR	NA18522	0	0	1	FALSE	haploid	TRUE	unrelated
NA18523	0	NA18523.LILRA7.tsv	0	0	1	YRI	AFR	NA18523	0	0	2	FALSE	haploid	TRUE	unrelated
NA18525	0	NA18525.LILRA7.tsv	0	0	1	CHB	EAS	NA18525	0	0	2	FALSE	haploid	TRUE	unrelated
NA18526	0	NA18526.LILRA7.tsv	0	0	1	CHB	EAS	NA18526	0	0	2	FALSE	haploid	TRUE	unrelated
NA18528	0	NA18528.LILRA7.tsv	0	0	1	CHB	EAS	NA18528	0	0	2	FALSE	haploid	TRUE	unrelated
NA18530	0	NA18530.LILRA7.tsv	0	0	1	CHB	EAS	NA18530	0	0	1	FALSE	haploid	TRUE	unrelated
NA18531	0	NA18531.LILRA7.tsv	0	0	1	CHB	EAS	NA18531	0	0	2	FALSE	haploid	TRUE	unrelated
NA18532	0	NA18532.LILRA7.tsv	0	0	1	CHB	EAS	NA18532	0	0	2	FALSE	haploid	TRUE	unrelated
NA18533	0	NA18533.LILRA7.tsv	0	0	1	CHB	EAS	NA18533	0	0	2	FALSE	haploid	TRUE	unrelated
NA18534	0	NA18534.LILRA7.tsv	0	0	1	CHB	EAS	NA18534	0	0	1	FALSE	haploid	TRUE	unrelated
NA18535	0	NA18535.LILRA7.tsv	0	0	1	CHB	EAS	NA18535	0	0	2	FALSE	haploid	TRUE	unrelated
NA18536	0	NA18536.LILRA7.tsv	0	0	1	CHB	EAS	NA18536	0	0	1	FALSE	haploid	TRUE	unrelated
NA18537	0	NA18537.LILRA7.tsv	0	0	1	CHB	EAS	NA18537	0	0	2	FALSE	haploid	TRUE	unrelated
NA18538	0	NA18538.LILRA7.tsv	0	0	1	CHB	EAS	NA18538	0	0	2	FALSE	haploid	TRUE	unrelated
NA18539	0	NA18539.LILRA7.tsv	0	0	1	CHB	EAS	NA18539	0	0	2	FALSE	haploid	TRUE	unrelated
NA18541	0	NA18541.LILRA7.tsv	0	0	1	CHB	EAS	NA18541	0	0	2	FALSE	haploid	TRUE	unrelated
NA18542	0	NA18542.LILRA7.tsv	0	0	1	CHB	EAS	NA18542	0	0	2	FALSE	haploid	TRUE	unrelated
NA18543	0	NA18543.LILRA7.tsv	0	0	1	CHB	EAS	NA18543	0	0	1	FALSE	haploid	TRUE	unrelated
NA18544	0	NA18544.LILRA7.tsv	0	0	1	CHB	EAS	NA18544	0	0	1	FALSE	haploid	TRUE	unrelated
NA18545	0	NA18545.LILRA7.tsv	0	0	1	CHB	EAS	NA18545	0	0	2	FALSE	haploid	TRUE	unrelated
NA18546	0	NA18546.LILRA7.tsv	0	0	1	CHB	EAS	NA18546	0	0	1	FALSE	haploid	TRUE	unrelated
NA18547	0	NA18547.LILRA7.tsv	0	0	1	CHB	EAS	NA18547	0	0	2	FALSE	haploid	TRUE	unrelated
NA18548	0	NA18548.LILRA7.tsv	0	0	1	CHB	EAS	NA18548	0	0	1	FALSE	haploid	TRUE	unrelated
NA18549	0	NA18549.LILRA7.tsv	0	0	1	CHB	EAS	NA18549	0	0	1	FALSE	haploid	TRUE	unrelated
NA18550	0	NA18550.LILRA7.tsv	0	0	1	CHB	EAS	NA18550	0	0	2	FALSE	haploid	TRUE	unrelated
NA18552	0	NA18552.LILRA7.tsv	0	0	1	CHB	EAS	NA18552	0	0	2	FALSE	haploid	TRUE	unrelated
NA18553	0	NA18553.LILRA7.tsv	0	0	1	CHB	EAS	NA18553	0	0	2	FALSE	haploid	TRUE	unrelated
NA18555	0	NA18555.LILRA7.tsv	0	0	1	CHB	EAS	NA18555	0	0	2	FALSE	haploid	TRUE	unrelated
NA18557	0	NA18557.LILRA7.tsv	0	0	1	CHB	EAS	NA18557	0	0	1	FALSE	haploid	TRUE	unrelated
NA18558	0	NA18558.LILRA7.tsv	0	0	1	CHB	EAS	NA18558	0	0	1	FALSE	haploid	TRUE	unrelated
NA18559	0	NA18559.LILRA7.tsv	0	0	1	CHB	EAS	NA18559	0	0	1	FALSE	haploid	TRUE	unrelated
NA18560	0	NA18560.LILRA7.tsv	0	0	1	CHB	EAS	NA18560	0	0	2	FALSE	haploid	TRUE	unrelated
NA18561	0	NA18561.LILRA7.tsv	0	0	1	CHB	EAS	NA18561	0	0	1	FALSE	haploid	TRUE	unrelated
NA18562	0	NA18562.LILRA7.tsv	0	0	1	CHB	EAS	NA18562	0	0	1	FALSE	haploid	TRUE	unrelated
NA18563	0	NA18563.LILRA7.tsv	0	0	1	CHB	EAS	NA18563	0	0	1	FALSE	haploid	TRUE	unrelated
NA18564	0	NA18564.LILRA7.tsv	0	0	1	CHB	EAS	NA18564	0	0	2	FALSE	haploid	TRUE	unrelated
NA18565	0	NA18565.LILRA7.tsv	0	0	1	CHB	EAS	NA18565	0	0	2	FALSE	haploid	TRUE	unrelated
NA18566	0	NA18566.LILRA7.tsv	0	0	1	CHB	EAS	NA18566	0	0	2	FALSE	haploid	TRUE	unrelated
NA18567	0	NA18567.LILRA7.tsv	0	0	1	CHB	EAS	NA18567	0	0	2	FALSE	haploid	TRUE	unrelated
NA18570	0	NA18570.LILRA7.tsv	0	0	1	CHB	EAS	NA18570	0	0	2	FALSE	haploid	TRUE	unrelated
NA18571	0	NA18571.LILRA7.tsv	0	0	1	CHB	EAS	NA18571	0	0	2	FALSE	haploid	TRUE	unrelated
NA18572	0	NA18572.LILRA7.tsv	0	0	1	CHB	EAS	NA18572	0	0	1	FALSE	haploid	TRUE	unrelated
NA18573	0	NA18573.LILRA7.tsv	0	0	1	CHB	EAS	NA18573	0	0	2	FALSE	haploid	TRUE	unrelated
NA18574	0	NA18574.LILRA7.tsv	0	0	1	CHB	EAS	NA18574	0	0	2	FALSE	haploid	TRUE	unrelated
NA18577	0	NA18577.LILRA7.tsv	0	0	1	CHB	EAS	NA18577	0	0	2	FALSE	haploid	TRUE	unrelated
NA18579	0	NA18579.LILRA7.tsv	0	0	1	CHB	EAS	NA18579	0	0	2	FALSE	haploid	TRUE	unrelated
NA18582	0	NA18582.LILRA7.tsv	0	0	1	CHB	EAS	NA18582	0	0	2	FALSE	haploid	TRUE	unrelated
NA18591	0	NA18591.LILRA7.tsv	0	0	1	CHB	EAS	NA18591	0	0	2	FALSE	haploid	TRUE	unrelated
NA18592	0	NA18592.LILRA7.tsv	0	0	1	CHB	EAS	NA18592	0	0	2	FALSE	haploid	TRUE	unrelated
NA18593	0	NA18593.LILRA7.tsv	0	0	1	CHB	EAS	NA18593	0	0	2	FALSE	haploid	TRUE	unrelated
NA18595	0	NA18595.LILRA7.tsv	0	0	1	CHB	EAS	NA18595	0	0	2	FALSE	haploid	TRUE	unrelated
NA18596	0	NA18596.LILRA7.tsv	0	0	1	CHB	EAS	NA18596	0	0	2	FALSE	haploid	TRUE	unrelated
NA18597	0	NA18597.LILRA7.tsv	0	0	1	CHB	EAS	NA18597	0	0	2	FALSE	haploid	TRUE	unrelated
NA18599	0	NA18599.LILRA7.tsv	0	0	1	CHB	EAS	NA18599	0	0	2	FALSE	haploid	TRUE	unrelated
NA18602	0	NA18602.LILRA7.tsv	0	0	1	CHB	EAS	NA18602	0	0	2	FALSE	haploid	TRUE	unrelated
NA18603	0	NA18603.LILRA7.tsv	0	0	1	CHB	EAS	NA18603	0	0	1	FALSE	haploid	TRUE	unrelated
NA18605	0	NA18605.LILRA7.tsv	0	0	1	CHB	EAS	NA18605	0	0	1	FALSE	haploid	TRUE	unrelated
NA18606	0	NA18606.LILRA7.tsv	0	0	1	CHB	EAS	NA18606	0	0	1	FALSE	haploid	TRUE	unrelated
NA18608	0	NA18608.LILRA7.tsv	0	0	1	CHB	EAS	NA18608	0	0	1	FALSE	haploid	TRUE	unrelated
NA18609	0	NA18609.LILRA7.tsv	0	0	1	CHB	EAS	NA18609	0	0	1	FALSE	haploid	TRUE	unrelated
NA18610	0	NA18610.LILRA7.tsv	0	0	1	CHB	EAS	NA18610	0	0	2	FALSE	haploid	TRUE	unrelated
NA18611	0	NA18611.LILRA7.tsv	0	0	1	CHB	EAS	NA18611	0	0	1	FALSE	haploid	TRUE	unrelated
NA18612	0	NA18612.LILRA7.tsv	0	0	1	CHB	EAS	NA18612	0	0	1	FALSE	haploid	TRUE	unrelated
NA18613	236	NA18613.LILRA7.tsv	5.46806	1	0.999998	CHB	EAS	NA18613	0	0	1	FALSE	haploid	TRUE	unrelated
NA18614	0	NA18614.LILRA7.tsv	0	0	1	CHB	EAS	NA18614	0	0	2	FALSE	haploid	TRUE	unrelated
NA18615	0	NA18615.LILRA7.tsv	0	0	1	CHB	EAS	NA18615	0	0	2	FALSE	haploid	TRUE	unrelated
NA18616	0	NA18616.LILRA7.tsv	0	0	1	CHB	EAS	NA18616	0	0	2	FALSE	haploid	TRUE	unrelated
NA18617	0	NA18617.LILRA7.tsv	0	0	1	CHB	EAS	NA18617	0	0	2	FALSE	haploid	TRUE	unrelated
NA18618	0	NA18618.LILRA7.tsv	0	0	1	CHB	EAS	NA18618	0	0	2	FALSE	haploid	TRUE	unrelated
NA18619	0	NA18619.LILRA7.tsv	0	0	1	CHB	EAS	NA18619	0	0	2	FALSE	haploid	TRUE	unrelated
NA18620	0	NA18620.LILRA7.tsv	0	0	1	CHB	EAS	NA18620	0	0	1	FALSE	haploid	TRUE	unrelated
NA18621	0	NA18621.LILRA7.tsv	0	0	1	CHB	EAS	NA18621	0	0	1	FALSE	haploid	TRUE	unrelated
NA18622	0	NA18622.LILRA7.tsv	0	0	1	CHB	EAS	NA18622	0	0	1	FALSE	haploid	TRUE	unrelated
NA18623	0	NA18623.LILRA7.tsv	0	0	1	CHB	EAS	NA18623	0	0	1	FALSE	haploid	TRUE	unrelated
NA18624	0	NA18624.LILRA7.tsv	0	0	1	CHB	EAS	NA18624	0	0	1	FALSE	haploid	TRUE	unrelated
NA18625	0	NA18625.LILRA7.tsv	0	0	1	CHB	EAS	NA18625	0	0	2	FALSE	haploid	TRUE	unrelated
NA18626	0	NA18626.LILRA7.tsv	0	0	1	CHB	EAS	NA18626	0	0	2	FALSE	haploid	TRUE	unrelated
NA18627	0	NA18627.LILRA7.tsv	0	0	1	CHB	EAS	NA18627	0	0	2	FALSE	haploid	TRUE	unrelated
NA18628	0	NA18628.LILRA7.tsv	0	0	1	CHB	EAS	NA18628	0	0	2	FALSE	haploid	TRUE	unrelated
NA18629	0	NA18629.LILRA7.tsv	0	0	1	CHB	EAS	NA18629	0	0	1	FALSE	haploid	TRUE	unrelated
NA18630	0	NA18630.LILRA7.tsv	0	0	1	CHB	EAS	NA18630	0	0	2	FALSE	haploid	TRUE	unrelated
NA18631	0	NA18631.LILRA7.tsv	0	0	1	CHB	EAS	NA18631	0	0	2	FALSE	haploid	TRUE	unrelated
NA18632	0	NA18632.LILRA7.tsv	0	0	1	CHB	EAS	NA18632	0	0	1	FALSE	haploid	TRUE	unrelated
NA18633	0	NA18633.LILRA7.tsv	0	0	1	CHB	EAS	NA18633	0	0	1	FALSE	haploid	TRUE	unrelated
NA18634	0	NA18634.LILRA7.tsv	0	0	1	CHB	EAS	NA18634	0	0	2	FALSE	haploid	TRUE	unrelated
NA18635	0	NA18635.LILRA7.tsv	0	0	1	CHB	EAS	NA18635	0	0	1	FALSE	haploid	TRUE	unrelated
NA18636	0	NA18636.LILRA7.tsv	0	0	1	CHB	EAS	NA18636	0	0	1	FALSE	haploid	TRUE	unrelated
NA18637	0	NA18637.LILRA7.tsv	0	0	1	CHB	EAS	NA18637	0	0	1	FALSE	haploid	TRUE	unrelated
NA18638	0	NA18638.LILRA7.tsv	0	0	1	CHB	EAS	NA18638	0	0	1	FALSE	haploid	TRUE	unrelated
NA18639	0	NA18639.LILRA7.tsv	0	0	1	CHB	EAS	NA18639	0	0	1	FALSE	haploid	TRUE	unrelated
NA18640	0	NA18640.LILRA7.tsv	0	0	1	CHB	EAS	NA18640	0	0	2	FALSE	haploid	TRUE	unrelated
NA18641	0	NA18641.LILRA7.tsv	0	0	1	CHB	EAS	NA18641	0	0	2	FALSE	haploid	TRUE	unrelated
NA18642	0	NA18642.LILRA7.tsv	0	0	1	CHB	EAS	NA18642	0	0	2	FALSE	haploid	TRUE	unrelated
NA18643	0	NA18643.LILRA7.tsv	0	0	1	CHB	EAS	NA18643	0	0	1	FALSE	haploid	TRUE	unrelated
NA18644	0	NA18644.LILRA7.tsv	0	0	1	CHB	EAS	NA18644	0	0	2	FALSE	haploid	TRUE	unrelated
NA18645	0	NA18645.LILRA7.tsv	0	0	1	CHB	EAS	NA18645	0	0	1	FALSE	haploid	TRUE	unrelated
NA18646	0	NA18646.LILRA7.tsv	0	0	1	CHB	EAS	NA18646	0	0	2	FALSE	haploid	TRUE	unrelated
NA18647	0	NA18647.LILRA7.tsv	0	0	1	CHB	EAS	NA18647	0	0	1	FALSE	haploid	TRUE	unrelated
NA18648	0	NA18648.LILRA7.tsv	0	0	1	CHB	EAS	NA18648	0	0	1	FALSE	haploid	TRUE	unrelated
NA18740	0	NA18740.LILRA7.tsv	0	0	1	CHB	EAS	NA18740	0	0	1	FALSE	haploid	TRUE	unrelated
NA18745	0	NA18745.LILRA7.tsv	0	0	1	CHB	EAS	NA18745	0	0	1	FALSE	haploid	TRUE	unrelated
NA18747	0	NA18747.LILRA7.tsv	0	0	1	CHB	EAS	NA18747	0	0	1	FALSE	haploid	TRUE	unrelated
NA18748	0	NA18748.LILRA7.tsv	0	0	1	CHB	EAS	NA18748	0	0	1	FALSE	haploid	TRUE	unrelated
NA18749	0	NA18749.LILRA7.tsv	0	0	1	CHB	EAS	NA18749	0	0	1	FALSE	haploid	TRUE	unrelated
NA18757	0	NA18757.LILRA7.tsv	0	0	1	CHB	EAS	NA18757	0	0	1	FALSE	haploid	TRUE	unrelated
NA18853	0	NA18853.LILRA7.tsv	0	0	1	YRI	AFR	NA18853	0	0	1	FALSE	haploid	TRUE	unrelated
NA18856	0	NA18856.LILRA7.tsv	0	0	1	YRI	AFR	NA18856	0	0	1	FALSE	haploid	TRUE	unrelated
NA18858	0	NA18858.LILRA7.tsv	0	0	1	YRI	AFR	NA18858	0	0	2	FALSE	haploid	TRUE	unrelated
NA18861	0	NA18861.LILRA7.tsv	0	0	1	YRI	AFR	NA18861	0	0	2	FALSE	haploid	TRUE	unrelated
NA18864	0	NA18864.LILRA7.tsv	0	0	1	YRI	AFR	NA18864	0	0	2	FALSE	haploid	TRUE	unrelated
NA18865	0	NA18865.LILRA7.tsv	0	0	1	YRI	AFR	NA18865	0	0	1	FALSE	haploid	TRUE	unrelated
NA18867	0	NA18867.LILRA7.tsv	0	0	1	YRI	AFR	NA18867	0	0	2	FALSE	haploid	TRUE	unrelated
NA18868	0	NA18868.LILRA7.tsv	0	0	1	YRI	AFR	NA18868	0	0	1	FALSE	haploid	TRUE	unrelated
NA18870	0	NA18870.LILRA7.tsv	0	0	1	YRI	AFR	NA18870	0	0	2	FALSE	haploid	TRUE	unrelated
NA18871	0	NA18871.LILRA7.tsv	0	0	1	YRI	AFR	NA18871	0	0	1	FALSE	haploid	TRUE	unrelated
NA18873	0	NA18873.LILRA7.tsv	0	0	1	YRI	AFR	NA18873	0	0	2	FALSE	haploid	TRUE	unrelated
NA18874	0	NA18874.LILRA7.tsv	0	0	1	YRI	AFR	NA18874	0	0	1	FALSE	haploid	TRUE	unrelated
NA18876	0	NA18876.LILRA7.tsv	0	0	1	YRI	AFR	NA18876	0	0	2	FALSE	haploid	TRUE	unrelated
NA18877	0	NA18877.LILRA7.tsv	0	0	1	YRI	AFR	NA18877	0	0	1	FALSE	haploid	TRUE	unrelated
NA18878	0	NA18878.LILRA7.tsv	0	0	1	YRI	AFR	NA18878	0	0	2	FALSE	haploid	TRUE	unrelated
NA18879	0	NA18879.LILRA7.tsv	0	0	1	YRI	AFR	NA18879	0	0	1	FALSE	haploid	TRUE	unrelated
NA18881	0	NA18881.LILRA7.tsv	0	0	1	YRI	AFR	NA18881	0	0	2	FALSE	haploid	TRUE	unrelated
NA18907	0	NA18907.LILRA7.tsv	0	0	1	YRI	AFR	NA18907	0	0	2	FALSE	haploid	TRUE	unrelated
NA18908	0	NA18908.LILRA7.tsv	0	0	1	YRI	AFR	NA18908	0	0	1	FALSE	haploid	TRUE	unrelated
NA18909	0	NA18909.LILRA7.tsv	0	0	1	YRI	AFR	NA18909	0	0	2	FALSE	haploid	TRUE	unrelated
NA18910	0	NA18910.LILRA7.tsv	0	0	1	YRI	AFR	NA18910	0	0	1	FALSE	haploid	TRUE	unrelated
NA18912	0	NA18912.LILRA7.tsv	0	0	1	YRI	AFR	NA18912	0	0	2	FALSE	haploid	TRUE	unrelated
NA18915	0	NA18915.LILRA7.tsv	0	0	1	YRI	AFR	NA18915	0	0	1	FALSE	haploid	TRUE	unrelated
NA18916	0	NA18916.LILRA7.tsv	0	0	1	YRI	AFR	NA18916	0	0	2	FALSE	haploid	TRUE	unrelated
NA18917	0	NA18917.LILRA7.tsv	0	0	1	YRI	AFR	NA18917	0	0	1	FALSE	haploid	TRUE	unrelated
NA18923	0	NA18923.LILRA7.tsv	0	0	1	YRI	AFR	NA18923	0	0	1	FALSE	haploid	TRUE	unrelated
NA18924	0	NA18924.LILRA7.tsv	0	0	1	YRI	AFR	NA18924	0	0	2	FALSE	haploid	TRUE	unrelated
NA18933	0	NA18933.LILRA7.tsv	0	0	1	YRI	AFR	NA18933	0	0	2	FALSE	haploid	TRUE	unrelated
NA18934	0	NA18934.LILRA7.tsv	0	0	1	YRI	AFR	NA18934	0	0	1	FALSE	haploid	TRUE	unrelated
NA18939	0	NA18939.LILRA7.tsv	0	0	1	JPT	EAS	NA18939	0	0	2	FALSE	haploid	TRUE	unrelated
NA18940	0	NA18940.LILRA7.tsv	0	0	1	JPT	EAS	NA18940	0	0	1	FALSE	haploid	TRUE	unrelated
NA18941	0	NA18941.LILRA7.tsv	0	0	1	JPT	EAS	NA18941	0	0	2	FALSE	haploid	TRUE	unrelated
NA18942	0	NA18942.LILRA7.tsv	0	0	1	JPT	EAS	NA18942	0	0	2	FALSE	haploid	TRUE	unrelated
NA18943	0	NA18943.LILRA7.tsv	0	0	1	JPT	EAS	NA18943	0	0	1	FALSE	haploid	TRUE	unrelated
NA18944	0	NA18944.LILRA7.tsv	0	0	1	JPT	EAS	NA18944	0	0	1	FALSE	haploid	TRUE	unrelated
NA18945	251	NA18945.LILRA7.tsv	5.52943	1	0.999995	JPT	EAS	NA18945	0	0	1	FALSE	haploid	TRUE	unrelated
NA18946	0	NA18946.LILRA7.tsv	0	0	1	JPT	EAS	NA18946	0	0	2	FALSE	haploid	TRUE	unrelated
NA18947	0	NA18947.LILRA7.tsv	0	0	1	JPT	EAS	NA18947	0	0	2	FALSE	haploid	TRUE	unrelated
NA18948	0	NA18948.LILRA7.tsv	0	0	1	JPT	EAS	NA18948	0	0	1	FALSE	haploid	TRUE	unrelated
NA18949	0	NA18949.LILRA7.tsv	0	0	1	JPT	EAS	NA18949	0	0	2	FALSE	haploid	TRUE	unrelated
NA18950	0	NA18950.LILRA7.tsv	0	0	1	JPT	EAS	NA18950	0	0	2	FALSE	haploid	TRUE	unrelated
NA18951	0	NA18951.LILRA7.tsv	0	0	1	JPT	EAS	NA18951	0	0	2	FALSE	haploid	TRUE	unrelated
NA18952	0	NA18952.LILRA7.tsv	0	0	1	JPT	EAS	NA18952	0	0	1	FALSE	haploid	TRUE	unrelated
NA18953	0	NA18953.LILRA7.tsv	0	0	1	JPT	EAS	NA18953	0	0	1	FALSE	haploid	TRUE	unrelated
NA18954	255	NA18954.LILRA7.tsv	5.54518	1	0.999994	JPT	EAS	NA18954	0	0	2	FALSE	haploid	TRUE	unrelated
NA18956	0	NA18956.LILRA7.tsv	0	0	1	JPT	EAS	NA18956	0	0	2	FALSE	haploid	TRUE	unrelated
NA18957	0	NA18957.LILRA7.tsv	0	0	1	JPT	EAS	NA18957	0	0	2	FALSE	haploid	TRUE	unrelated
NA18959	0	NA18959.LILRA7.tsv	0	0	1	JPT	EAS	NA18959	0	0	1	FALSE	haploid	TRUE	unrelated
NA18960	0	NA18960.LILRA7.tsv	0	0	1	JPT	EAS	NA18960	0	0	1	FALSE	haploid	TRUE	unrelated
NA18961	0	NA18961.LILRA7.tsv	0	0	1	JPT	EAS	NA18961	0	0	1	FALSE	haploid	TRUE	unrelated
NA18962	0	NA18962.LILRA7.tsv	0	0	1	JPT	EAS	NA18962	0	0	1	FALSE	haploid	TRUE	unrelated
NA18963	0	NA18963.LILRA7.tsv	0	0	1	JPT	EAS	NA18963	0	0	2	FALSE	haploid	TRUE	unrelated
NA18964	0	NA18964.LILRA7.tsv	0	0	1	JPT	EAS	NA18964	0	0	2	FALSE	haploid	TRUE	unrelated
NA18965	0	NA18965.LILRA7.tsv	0	0	1	JPT	EAS	NA18965	0	0	1	FALSE	haploid	TRUE	unrelated
NA18966	0	NA18966.LILRA7.tsv	0	0	1	JPT	EAS	NA18966	0	0	1	FALSE	haploid	TRUE	unrelated
NA18967	0	NA18967.LILRA7.tsv	0	0	1	JPT	EAS	NA18967	0	0	1	FALSE	haploid	TRUE	unrelated
NA18968	0	NA18968.LILRA7.tsv	0	0	1	JPT	EAS	NA18968	0	0	2	FALSE	haploid	TRUE	unrelated
NA18969	0	NA18969.LILRA7.tsv	0	0	1	JPT	EAS	NA18969	0	0	2	FALSE	haploid	TRUE	unrelated
NA18970	0	NA18970.LILRA7.tsv	0	0	1	JPT	EAS	NA18970	0	0	1	FALSE	haploid	TRUE	unrelated
NA18971	0	NA18971.LILRA7.tsv	0	0	1	JPT	EAS	NA18971	0	0	1	FALSE	haploid	TRUE	unrelated
NA18972	0	NA18972.LILRA7.tsv	0	0	1	JPT	EAS	NA18972	0	0	2	FALSE	haploid	TRUE	unrelated
NA18973	0	NA18973.LILRA7.tsv	0	0	1	JPT	EAS	NA18973	0	0	2	FALSE	haploid	TRUE	unrelated
NA18974	0	NA18974.LILRA7.tsv	0	0	1	JPT	EAS	NA18974	0	0	1	FALSE	haploid	TRUE	unrelated
NA18975	0	NA18975.LILRA7.tsv	0	0	1	JPT	EAS	NA18975	0	0	2	FALSE	haploid	TRUE	unrelated
NA18976	0	NA18976.LILRA7.tsv	0	0	1	JPT	EAS	NA18976	0	0	2	FALSE	haploid	TRUE	unrelated
NA18977	0	NA18977.LILRA7.tsv	0	0	1	JPT	EAS	NA18977	0	0	1	FALSE	haploid	TRUE	unrelated
NA18978	0	NA18978.LILRA7.tsv	0	0	1	JPT	EAS	NA18978	0	0	2	FALSE	haploid	TRUE	unrelated
NA18979	0	NA18979.LILRA7.tsv	0	0	1	JPT	EAS	NA18979	0	0	2	FALSE	haploid	TRUE	unrelated
NA18980	0	NA18980.LILRA7.tsv	0	0	1	JPT	EAS	NA18980	0	0	2	FALSE	haploid	TRUE	unrelated
NA18981	0	NA18981.LILRA7.tsv	0	0	1	JPT	EAS	NA18981	0	0	2	FALSE	haploid	TRUE	unrelated
NA18982	0	NA18982.LILRA7.tsv	0	0	1	JPT	EAS	NA18982	0	0	1	FALSE	haploid	TRUE	unrelated
NA18983	0	NA18983.LILRA7.tsv	0	0	1	JPT	EAS	NA18983	0	0	1	FALSE	haploid	TRUE	unrelated
NA18984	0	NA18984.LILRA7.tsv	0	0	1	JPT	EAS	NA18984	0	0	1	FALSE	haploid	TRUE	unrelated
NA18985	0	NA18985.LILRA7.tsv	0	0	1	JPT	EAS	NA18985	0	0	1	FALSE	haploid	TRUE	unrelated
NA18986	0	NA18986.LILRA7.tsv	0	0	1	JPT	EAS	NA18986	0	0	1	FALSE	haploid	TRUE	unrelated
NA18987	0	NA18987.LILRA7.tsv	0	0	1	JPT	EAS	NA18987	0	0	2	FALSE	haploid	TRUE	unrelated
NA18988	0	NA18988.LILRA7.tsv	0	0	1	JPT	EAS	NA18988	0	0	1	FALSE	haploid	TRUE	unrelated
NA18989	0	NA18989.LILRA7.tsv	0	0	1	JPT	EAS	NA18989	0	0	1	FALSE	haploid	TRUE	unrelated
NA18990	0	NA18990.LILRA7.tsv	0	0	1	JPT	EAS	NA18990	0	0	1	FALSE	haploid	TRUE	unrelated
NA18991	0	NA18991.LILRA7.tsv	0	0	1	JPT	EAS	NA18991	0	0	2	FALSE	haploid	TRUE	unrelated
NA18992	0	NA18992.LILRA7.tsv	0	0	1	JPT	EAS	NA18992	0	0	2	FALSE	haploid	TRUE	unrelated
NA18993	0	NA18993.LILRA7.tsv	0	0	1	JPT	EAS	NA18993	0	0	2	FALSE	haploid	TRUE	unrelated
NA18994	0	NA18994.LILRA7.tsv	0	0	1	JPT	EAS	NA18994	0	0	1	FALSE	haploid	TRUE	unrelated
NA18995	0	NA18995.LILRA7.tsv	0	0	1	JPT	EAS	NA18995	0	0	1	FALSE	haploid	TRUE	unrelated
NA18997	0	NA18997.LILRA7.tsv	0	0	1	JPT	EAS	NA18997	0	0	2	FALSE	haploid	TRUE	unrelated
NA18998	0	NA18998.LILRA7.tsv	0	0	1	JPT	EAS	NA18998	0	0	2	FALSE	haploid	TRUE	unrelated
NA18999	0	NA18999.LILRA7.tsv	0	0	1	JPT	EAS	NA18999	0	0	2	FALSE	haploid	TRUE	unrelated
NA19000	0	NA19000.LILRA7.tsv	0	0	1	JPT	EAS	NA19000	0	0	1	FALSE	haploid	TRUE	unrelated
NA19001	0	NA19001.LILRA7.tsv	0	0	1	JPT	EAS	NA19001	0	0	2	FALSE	haploid	TRUE	unrelated
NA19002	0	NA19002.LILRA7.tsv	0	0	1	JPT	EAS	NA19002	0	0	2	FALSE	haploid	TRUE	unrelated
NA19003	0	NA19003.LILRA7.tsv	0	0	1	JPT	EAS	NA19003	0	0	2	FALSE	haploid	TRUE	unrelated
NA19004	0	NA19004.LILRA7.tsv	0	0	1	JPT	EAS	NA19004	0	0	1	FALSE	haploid	TRUE	unrelated
NA19005	0	NA19005.LILRA7.tsv	0	0	1	JPT	EAS	NA19005	0	0	1	FALSE	haploid	TRUE	unrelated
NA19006	0	NA19006.LILRA7.tsv	0	0	1	JPT	EAS	NA19006	0	0	1	FALSE	haploid	TRUE	unrelated
NA19007	0	NA19007.LILRA7.tsv	0	0	1	JPT	EAS	NA19007	0	0	1	FALSE	haploid	TRUE	unrelated
NA19009	0	NA19009.LILRA7.tsv	0	0	1	JPT	EAS	NA19009	0	0	1	FALSE	haploid	TRUE	unrelated
NA19010	0	NA19010.LILRA7.tsv	0	0	1	JPT	EAS	NA19010	0	0	2	FALSE	haploid	TRUE	unrelated
NA19011	0	NA19011.LILRA7.tsv	0	0	1	JPT	EAS	NA19011	0	0	2	FALSE	haploid	TRUE	unrelated
NA19012	279	NA19012.LILRA7.tsv	5.63479	1	0.999971	JPT	EAS	NA19012	0	0	1	FALSE	haploid	TRUE	unrelated
NA19017	0	NA19017.LILRA7.tsv	0	0	1	LWK	AFR	NA19017	0	0	2	FALSE	haploid	TRUE	unrelated
NA19019	0	NA19019.LILRA7.tsv	0	0	1	LWK	AFR	NA19019	0	0	2	FALSE	haploid	TRUE	unrelated
NA19020	0	NA19020.LILRA7.tsv	0	0	1	LWK	AFR	NA19020	0	0	1	FALSE	haploid	TRUE	unrelated
NA19023	0	NA19023.LILRA7.tsv	0	0	1	LWK	AFR	NA19023	0	0	2	FALSE	haploid	TRUE	unrelated
NA19024	0	NA19024.LILRA7.tsv	0	0	1	LWK	AFR	NA19024	0	0	2	FALSE	haploid	TRUE	unrelated
NA19025	0	NA19025.LILRA7.tsv	0	0	1	LWK	AFR	NA19025	0	0	1	FALSE	haploid	TRUE	unrelated
NA19026	0	NA19026.LILRA7.tsv	0	0	1	LWK	AFR	NA19026	0	0	1	FALSE	haploid	TRUE	unrelated
NA19027	0	NA19027.LILRA7.tsv	0	0	1	LWK	AFR	NA19027	0	0	1	FALSE	haploid	TRUE	unrelated
NA19028	0	NA19028.LILRA7.tsv	0	0	1	LWK	AFR	NA19028	0	0	1	FALSE	haploid	TRUE	unrelated
NA19030	0	NA19030.LILRA7.tsv	0	0	1	LWK	AFR	NA19030	0	0	2	FALSE	haploid	TRUE	unrelated
NA19031	0	NA19031.LILRA7.tsv	0	0	1	LWK	AFR	NA19031	0	0	1	FALSE	haploid	TRUE	unrelated
NA19035	0	NA19035.LILRA7.tsv	0	0	1	LWK	AFR	NA19035	0	0	1	FALSE	haploid	TRUE	unrelated
NA19036	0	NA19036.LILRA7.tsv	0	0	1	LWK	AFR	NA19036	0	0	2	FALSE	haploid	TRUE	unrelated
NA19037	0	NA19037.LILRA7.tsv	0	0	1	LWK	AFR	NA19037	0	0	2	FALSE	haploid	TRUE	unrelated
NA19038	0	NA19038.LILRA7.tsv	0	0	1	LWK	AFR	NA19038	0	0	2	FALSE	haploid	TRUE	unrelated
NA19041	0	NA19041.LILRA7.tsv	0	0	1	LWK	AFR	NA19041	0	0	1	FALSE	haploid	TRUE	unrelated
NA19042	0	NA19042.LILRA7.tsv	0	0	1	LWK	AFR	NA19042	0	0	2	FALSE	haploid	TRUE	unrelated
NA19043	0	NA19043.LILRA7.tsv	0	0	1	LWK	AFR	NA19043	0	0	1	FALSE	haploid	TRUE	unrelated
NA19054	222	NA19054.LILRA7.tsv	5.40717	1	0.999999	JPT	EAS	NA19054	0	0	2	FALSE	haploid	TRUE	unrelated
NA19055	0	NA19055.LILRA7.tsv	0	0	1	JPT	EAS	NA19055	0	0	1	FALSE	haploid	TRUE	unrelated
NA19056	0	NA19056.LILRA7.tsv	0	0	1	JPT	EAS	NA19056	0	0	1	FALSE	haploid	TRUE	unrelated
NA19057	0	NA19057.LILRA7.tsv	0	0	1	JPT	EAS	NA19057	0	0	2	FALSE	haploid	TRUE	unrelated
NA19058	0	NA19058.LILRA7.tsv	0	0	1	JPT	EAS	NA19058	0	0	1	FALSE	haploid	TRUE	unrelated
[truncated: 505 more rows]
